# Supplementary material
Source: MDPI journal article supplement (https://www.mdpi.com/search?q=materials-12-03034)
Supplement: s001 [file materials-12-03034-s001.pdf]

Article

# Comparison of Cinchona Catalysts Containing Ethyl or Vinyl or Ethynyl Group at Their Quinuclidine Ring

Sándor Nagy <sup>1</sup>, Zsuzsanna Fehér <sup>1</sup>, Gergő Dargó <sup>1,2</sup>, Júlia Barabás <sup>3</sup>, Zsófia Garádi <sup>3</sup>, Béla Mátravölgyi <sup>1</sup>, Péter Kisszékelyi <sup>1</sup>, Gyula Dargó <sup>1</sup>, Péter Huszthy <sup>1</sup>, Tibor Höltzl <sup>3,4</sup>, György Tibor Balogh <sup>2,5,\*</sup> and József Kupai <sup>1,\*</sup>

<sup>1</sup> Department of Organic Chemistry & Technology, Budapest University of Technology & Economics, Szent Gellért tér 4, Budapest H-1111, Hungary; nagy.sandor@mail.bme.hu (S.N.); zsuzsi516@gmail.com (Z.F.); dageri15@gmail.com (G.D.); bmatravolgyi@mail.bme.hu (B.M.); pkisszekelyi@mail.bme.hu (P.K.); huszthy@mail.bme.hu (P.H.)

<sup>2</sup> Chemical Department, Chemical Works of Gedeon Richter Plc., P.O. Box 27, Budapest H-1103, Hungary; gytbalogh@mail.bme.hu

<sup>3</sup> Department of Inorganic & Analytical Chemistry, Budapest University of Technology & Economics, Szent Gellért tér 4, Budapest H-1111, Hungary; julia.barabas@mail.bme.hu (J.B.); garadi.zsofia@egis.hu (Z.G.); tibor.holtzl@furukawaelectric.com (T.H.)

<sup>4</sup> Furukawa Electric Institute of Technology, Késmárk utca 28/A, Budapest H-1158, Hungary

<sup>5</sup> Department of Chemical & Environmental Process Engineering, Budapest University of Technology and Economics, Műegyetem rkp. 3., Budapest H-1111, Hungary

\* Correspondence address: jkupati@mail.bme.hu, Tel.: +36-1-463-2229 (J.K.); gytbalogh@mail.bme.hu, Tel.: +36-1-463-2174 (G.T.B.)

Received: 22 August 2019; Accepted: 12 September 2019; Published: date

1. The pK<sub>a</sub> Values of Catalysts Measured in Different SolventsTable S1. The measured pK<sub>a</sub> values of OH derivatives of cinchona in six different solvents.

|                       | HQ               |                  |                  |                  | Q                |                  |                  |                  | DQ               |                  |                  |
|-----------------------|------------------|------------------|------------------|------------------|------------------|------------------|------------------|------------------|------------------|------------------|------------------|
| Water                 | pK <sub>a1</sub> | pK <sub>a2</sub> |                  |                  | pK <sub>a1</sub> | pK <sub>a2</sub> |                  |                  | pK <sub>a1</sub> | pK <sub>a2</sub> |                  |
|                       | 4.36             | 9.10             |                  |                  | 4.34             | 8.52             |                  |                  | 4.34             | 7.40             |                  |
| <b>0% MeOH</b>        | pK <sub>a1</sub> | pK <sub>a2</sub> |                  |                  | pK <sub>a1</sub> | pK <sub>a2</sub> |                  |                  | pK <sub>a1</sub> | pK <sub>a2</sub> |                  |
| Yasuda–Shedlovsky     | 4.27             | 9.20             |                  |                  | 4.24             | 8.66             |                  |                  | 4.23             | 7.53             |                  |
| Linear                | 4.43             | 9.32             |                  |                  | 4.40             | 8.76             |                  |                  | 4.41             | 7.61             |                  |
| <b>98.0% MeOH</b>     | pK <sub>a1</sub> | pK <sub>a2</sub> |                  |                  | pK <sub>a1</sub> | pK <sub>a2</sub> |                  |                  | pK <sub>a1</sub> | pK <sub>a2</sub> |                  |
| Yasuda–Shedlovsky     | 2.45             | 8.01             |                  |                  | 2.40             | 7.74             |                  |                  | 2.20             | 6.93             |                  |
| Linear                | 2.77             | 8.12             |                  |                  | 2.73             | 7.74             |                  |                  | 2.60             | 6.81             |                  |
| <b>99.99% MeOH</b>    | pK <sub>a1</sub> | pK <sub>a2</sub> |                  |                  | pK <sub>a1</sub> | pK <sub>a2</sub> |                  |                  | pK <sub>a1</sub> | pK <sub>a2</sub> |                  |
| Yasuda–Shedlovsky     | 4.55             | 10.15            |                  |                  | 4.5              | 9.89             |                  |                  | 4.29             | 9.10             |                  |
| Linear                | 2.74             | 8.09             |                  |                  | 2.69             | 7.72             |                  |                  | 2.56             | 6.90             |                  |
| <b>0% MeCN</b>        | pK <sub>a1</sub> | pK <sub>a2</sub> |                  |                  | pK <sub>a1</sub> | pK <sub>a2</sub> |                  |                  | pK <sub>a1</sub> | pK <sub>a2</sub> |                  |
| Yasuda–Shedlovsky     | 3.99             | 9.17             |                  |                  | 3.97             | 8.6              |                  |                  | 3.94             | 7.5              |                  |
| Linear                | 4.1              | 9.22             |                  |                  | 4.09             | 8.64             |                  |                  | 4.06             | 7.54             |                  |
| <b>98.0% MeCN</b>     | pK <sub>a1</sub> | pK <sub>a2</sub> |                  |                  | pK <sub>a1</sub> | pK <sub>a2</sub> |                  |                  | pK <sub>a1</sub> | pK <sub>a2</sub> |                  |
| Yasuda–Shedlovsky     | 4.28             | 10.15            |                  |                  | 4.2              | 9.76             |                  |                  | 4.24             | 8.62             |                  |
| Linear                | 3.17             | 9.04             |                  |                  | 3.1              | 8.64             |                  |                  | 3.13             | 7.51             |                  |
| <b>99.99% MeCN</b>    | pK <sub>a1</sub> | pK <sub>a2</sub> |                  |                  | pK <sub>a1</sub> | pK <sub>a2</sub> |                  |                  | pK <sub>a1</sub> | pK <sub>a2</sub> |                  |
| Yasuda–Shedlovsky     | 6.6              | 12.46            |                  |                  | 6.53             | 12.07            |                  |                  | 6.56             | 10.94            |                  |
| Linear                | 3.15             | 9.03             |                  |                  | 3.08             | 8.64             |                  |                  | 3.11             | 7.51             |                  |
| <b>0% Dioxane</b>     | pK <sub>a1</sub> | pK <sub>a2</sub> | pK <sub>a3</sub> | pK <sub>a4</sub> | pK <sub>a1</sub> | pK <sub>a2</sub> | pK <sub>a3</sub> | pK <sub>a4</sub> | pK <sub>a1</sub> | pK <sub>a2</sub> | pK <sub>a3</sub> |
| Yasuda–Shedlovsky     | 3.86             | 6.92             | 9.14             | 11.08            | 3.78             | 6.82             | 8.62             | 11.25            | 3.79             | 7.14             | 11.28            |
| Linear                | 4.17             | 6.91             | 9.27             | 10.85            | 4.1              | 6.75             | 8.76             | 11.12            | 4.13             | 7.17             | 11.17            |
| <b>98.0% Dioxane</b>  | pK <sub>a1</sub> | pK <sub>a2</sub> | pK <sub>a3</sub> | pK <sub>a4</sub> | pK <sub>a1</sub> | pK <sub>a2</sub> | pK <sub>a3</sub> | pK <sub>a4</sub> | pK <sub>a1</sub> | pK <sub>a2</sub> | pK <sub>a3</sub> |
| Yasuda–Shedlovsky     | -12.35           | 6.20             | 1.45             | 20.79            | -11.14           | 8.01             | 1.67             | 15.65            | -12.64           | 4.81             | 14.9             |
| Linear                | 2.68             | 7.32             | 8.82             | 12.54            | 2.70             | 7.42             | 8.36             | 12.18            | 2.58             | 7.36             | 12.12            |
| <b>99.99% Dioxane</b> | pK <sub>a1</sub> | pK <sub>a2</sub> | pK <sub>a3</sub> | pK <sub>a4</sub> | pK <sub>a1</sub> | pK <sub>a2</sub> | pK <sub>a3</sub> | pK <sub>a4</sub> | pK <sub>a1</sub> | pK <sub>a2</sub> | pK <sub>a3</sub> |
| Yasuda–Shedlovsky     | -16.44           | 7.64             | 0.4              | 25.96            | -14.76           | 10.41            | 0.9              | 18.92            | -16.8            | 5.68             | 17.89            |
| Linear                | 2.65             | 7.33             | 8.81             | 12.57            | 2.67             | 7.43             | 8.35             | 12.20            | 2.55             | 7.37             | 12.14            |
| <b>0% THF</b>         | pK <sub>a1</sub> | pK <sub>a2</sub> | pK <sub>a3</sub> |                  | pK <sub>a1</sub> | pK <sub>a2</sub> | pK <sub>a3</sub> |                  | pK <sub>a1</sub> | pK <sub>a2</sub> | pK <sub>a3</sub> |
| Yasuda–Shedlovsky     | 4.02             | 3.23             | 11.82            |                  | 3.98             | 8.74             | 11.78            |                  | 3.95             | 7.57             | 11.74            |
| Linear                | 4.55             | 9.75             | 11.94            |                  | 4.51             | 9.23             | 11.88            |                  | 4.49             | 7.96             | 11.83            |
| <b>98.0% THF</b>      | pK <sub>a1</sub> | pK <sub>a2</sub> | pK <sub>a3</sub> |                  | pK <sub>a1</sub> | pK <sub>a2</sub> | pK <sub>a3</sub> |                  | pK <sub>a1</sub> | pK <sub>a2</sub> | pK <sub>a3</sub> |
| Yasuda–Shedlovsky     | -4.77            | 0.68             | 10.56            |                  | -5.21            | 0.30             | 10.83            |                  | -5.02            | 1.24             | 11.00            |
| Linear                | 1.30             | 6.59             | 11.53            |                  | 1.17             | 6.19             | 11.60            |                  | 1.17             | 5.65             | 11.62            |
| <b>99.99% THF</b>     | pK <sub>a1</sub> | pK <sub>a2</sub> | pK <sub>a3</sub> |                  | pK <sub>a1</sub> | pK <sub>a2</sub> | pK <sub>a3</sub> |                  | pK <sub>a1</sub> | pK <sub>a2</sub> | pK <sub>a3</sub> |
| Yasuda–Shedlovsky     | -3.09            | 2.38             | 12.69            |                  | -3.55            | 2.01             | 12.97            |                  | -3.35            | 3.07             | 13.16            |
| Linear                | 1.23             | 6.52             | 11.52            |                  | 1.10             | 6.13             | 11.60            |                  | 1.10             | 5.60             | 11.61            |
| <b>0% DMSO</b>        | pK <sub>a1</sub> | pK <sub>a2</sub> |                  |                  | pK <sub>a1</sub> | pK <sub>a2</sub> |                  |                  | pK <sub>a1</sub> | pK <sub>a2</sub> |                  |

|                    |                        |                        |                        |                        |                        |                        |
|--------------------|------------------------|------------------------|------------------------|------------------------|------------------------|------------------------|
| Yasuda–Shedlovsky  | 3.99                   | 9.07                   | 3.95                   | 8.52                   | 3.91                   | 7.29                   |
| Linear             | 4.37                   | 9.29                   | 4.36                   | 8.72                   | 4.35                   | 7.47                   |
| <b>98.0% DMSO</b>  | <b>pK<sub>a1</sub></b> | <b>pK<sub>a2</sub></b> | <b>pK<sub>a1</sub></b> | <b>pK<sub>a2</sub></b> | <b>pK<sub>a1</sub></b> | <b>pK<sub>a2</sub></b> |
| Yasuda–Shedlovsky  | −3.04                  | 5.24                   | −3.33                  | 5.14                   | −3.70                  | 4.67                   |
| Linear             | 2.30                   | 8.22                   | 2.17                   | 7.77                   | 2.02                   | 6.74                   |
| <b>99.99% DMSO</b> | <b>pK<sub>a1</sub></b> | <b>pK<sub>a2</sub></b> | <b>pK<sub>a1</sub></b> | <b>pK<sub>a2</sub></b> | <b>pK<sub>a1</sub></b> | <b>pK<sub>a2</sub></b> |
| Yasuda–Shedlovsky  | −1.55                  | 7.03                   | −1.86                  | 6.97                   | −2.26                  | 6.58                   |
| Linear             | <b>2.26</b>            | <b>8.2</b>             | <b>2.13</b>            | <b>7.76</b>            | <b>1.97</b>            | <b>6.72</b>            |

Table S2. The measured pK<sub>a</sub> values of cinchona amine derivatives in six different solvents.

|                       | HQ-N                   |                        |                        |                        |                        | Q-N                    |                        |                        |                        |                        | DQ-N                   |                        |                        |                        |                        |
|-----------------------|------------------------|------------------------|------------------------|------------------------|------------------------|------------------------|------------------------|------------------------|------------------------|------------------------|------------------------|------------------------|------------------------|------------------------|------------------------|
| Water                 | pK <sub>a1</sub>       | pK <sub>a2</sub>       | pK <sub>a3</sub>       |                        |                        | pK <sub>a1</sub>       | pK <sub>a2</sub>       | pK <sub>a3</sub>       |                        |                        | pK <sub>a1</sub>       | pK <sub>a2</sub>       | pK <sub>a3</sub>       |                        |                        |
|                       | <b>2.07</b>            | <b>4.47</b>            | <b>9.71</b>            |                        |                        | <b>2.02</b>            | <b>4.42</b>            | <b>9.10</b>            |                        |                        | <b>1.93</b>            | <b>4.34</b>            | <b>8.10</b>            |                        |                        |
| <b>0% MeOH</b>        | <b>pK<sub>a1</sub></b> | <b>pK<sub>a2</sub></b> | <b>pK<sub>a3</sub></b> |                        |                        | <b>pK<sub>a1</sub></b> | <b>pK<sub>a2</sub></b> | <b>pK<sub>a3</sub></b> |                        |                        | <b>pK<sub>a1</sub></b> | <b>pK<sub>a2</sub></b> | <b>pK<sub>a3</sub></b> |                        |                        |
| Yasuda–Shedlovsky     | 1.98                   | 4.28                   | 9.65                   |                        |                        | 1.94                   | 4.25                   | 9.07                   |                        |                        | 1.87                   | 4.16                   | 8.00                   |                        |                        |
| Linear                | 2.11                   | 4.47                   | 9.84                   |                        |                        | 2.07                   | 4.45                   | 9.24                   |                        |                        | 2.01                   | 4.38                   | 8.13                   |                        |                        |
| <b>98.0% MeOH</b>     |                        |                        |                        |                        |                        |                        |                        |                        |                        |                        |                        |                        |                        |                        |                        |
| Yasuda–Shedlovsky     | 1.05                   | 2.74                   | 8.02                   |                        |                        | 1.05                   | 2.61                   | 7.65                   |                        |                        | 0.87                   | 2.19                   | 7.17                   |                        |                        |
| Linear                | 1.02                   | 2.92                   | 8.24                   |                        |                        | 1.00                   | 2.82                   | 2.79                   |                        |                        | 0.87                   | 2.53                   | 7.09                   |                        |                        |
| <b>99.99% MeOH</b>    |                        |                        |                        |                        |                        |                        |                        |                        |                        |                        |                        |                        |                        |                        |                        |
| Yasuda–Shedlovsky     | 3.20                   | 4.86                   | 10.13                  |                        |                        | 3.20                   | 4.72                   | 9.78                   |                        |                        | 3.02                   | 4.29                   | 9.32                   |                        |                        |
| <b>Linear</b>         | <b>1.00</b>            | <b>2.89</b>            | <b>8.21</b>            |                        |                        | <b>0.98</b>            | <b>2.79</b>            | <b>7.76</b>            |                        |                        | <b>0.84</b>            | <b>2.49</b>            | <b>7.07</b>            |                        |                        |
| <b>0% MeCN</b>        | <b>pK<sub>a1</sub></b> | <b>pK<sub>a2</sub></b> | <b>pK<sub>a3</sub></b> |                        |                        | <b>pK<sub>a1</sub></b> | <b>pK<sub>a2</sub></b> | <b>pK<sub>a3</sub></b> |                        |                        | <b>pK<sub>a1</sub></b> | <b>pK<sub>a2</sub></b> | <b>pK<sub>a3</sub></b> |                        |                        |
| Yasuda–Shedlovsky     | 1.92                   | 4.02                   | 9.49                   |                        |                        | 1.92                   | 4.00                   | 8.93                   |                        |                        | 1.83                   | 3.89                   | 7.83                   |                        |                        |
| Linear                | 2.07                   | 4.15                   | 9.55                   |                        |                        | 2.08                   | 4.14                   | 9.00                   |                        |                        | 1.98                   | 4.02                   | 7.86                   |                        |                        |
| <b>98.0% MeCN</b>     |                        |                        |                        |                        |                        |                        |                        |                        |                        |                        |                        |                        |                        |                        |                        |
| Yasuda–Shedlovsky     | 1.74                   | 4.15                   | 10.33                  |                        |                        | 1.62                   | 4.04                   | 9.73                   |                        |                        | 1.53                   | 3.97                   | 9.00                   |                        |                        |
| Linear                | 0.67                   | 3.05                   | 9.22                   |                        |                        | 0.55                   | 2.94                   | 8.62                   |                        |                        | 0.47                   | 2.86                   | 7.88                   |                        |                        |
| <b>99.99% MeCN</b>    |                        |                        |                        |                        |                        |                        |                        |                        |                        |                        |                        |                        |                        |                        |                        |
| Yasuda–Shedlovsky     | 4.07                   | 6.47                   | 12.65                  |                        |                        | 3.95                   | 6.37                   | 12.05                  |                        |                        | 3.86                   | 6.29                   | 11.31                  |                        |                        |
| <b>Linear</b>         | <b>0.64</b>            | <b>3.02</b>            | <b>9.21</b>            |                        |                        | <b>0.52</b>            | <b>2.91</b>            | <b>8.61</b>            |                        |                        | <b>0.43</b>            | <b>2.84</b>            | <b>7.88</b>            |                        |                        |
| <b>0% Dioxane</b>     | <b>pK<sub>a1</sub></b> | <b>pK<sub>a2</sub></b> | <b>pK<sub>a3</sub></b> | <b>pK<sub>a4</sub></b> | <b>pK<sub>a5</sub></b> | <b>pK<sub>a1</sub></b> | <b>pK<sub>a2</sub></b> | <b>pK<sub>a3</sub></b> | <b>pK<sub>a4</sub></b> | <b>pK<sub>a5</sub></b> | <b>pK<sub>a1</sub></b> | <b>pK<sub>a2</sub></b> | <b>pK<sub>a3</sub></b> | <b>pK<sub>a4</sub></b> | <b>pK<sub>a5</sub></b> |
| Yasuda–Shedlovsky     | 1.8                    | 3.76                   | 6.76                   | 9.55                   | 11.29                  | 1.7                    | 3.69                   | 6.3                    | 8.94                   | 11.4                   | 1.67                   | 3.63                   | 6.47                   | 7.81                   | 11.22                  |
| Linear                | 2.01                   | 3.93                   | 6.62                   | 9.77                   | 11.2                   | 1.84                   | 3.86                   | 5.75                   | 9.1                    | 11.33                  | 1.78                   | 3.86                   | 6.14                   | 7.69                   | 11.07                  |
| <b>98.0% Dioxane</b>  |                        |                        |                        |                        |                        |                        |                        |                        |                        |                        |                        |                        |                        |                        |                        |
| Yasuda–Shedlovsky     | −5.04                  | −1.91                  | 10.32                  | 1.23                   | 14.22                  | −2.66                  | −1.37                  | 19.52                  | 3.33                   | 12.75                  | −2.38                  | −3.62                  | 15.52                  | 11.64                  | 16.36                  |
| Linear                | 1.47                   | 3.56                   | 7.65                   | 9.09                   | 12.06                  | 1.64                   | 3.54                   | 8.37                   | 8.77                   | 12.01                  | 1.68                   | 3.25                   | 8.00                   | 8.68                   | 12.22                  |
| <b>99.99% Dioxane</b> |                        |                        |                        |                        |                        |                        |                        |                        |                        |                        |                        |                        |                        |                        |                        |
| Yasuda–Shedlovsky     | −5.78                  | −2.23                  | 13.29                  | −0.04                  | 16.96                  | −2.51                  | −1.47                  | 25.94                  | 3.03                   | 14.79                  | −2.13                  | −4.51                  | 20.45                  | 14.71                  | 19.89                  |
| <b>Linear</b>         | <b>1.46</b>            | <b>3.55</b>            | <b>7.67</b>            | <b>9.07</b>            | <b>12.08</b>           | <b>1.63</b>            | <b>3.53</b>            | <b>8.42</b>            | <b>8.76</b>            | <b>12.02</b>           | <b>1.67</b>            | <b>3.24</b>            | <b>8.03</b>            | <b>8.70</b>            | <b>12.24</b>           |
| <b>0% THF</b>         | <b>pK<sub>a1</sub></b> | <b>pK<sub>a2</sub></b> | <b>pK<sub>a3</sub></b> | <b>pK<sub>a4</sub></b> |                        | <b>pK<sub>a1</sub></b> | <b>pK<sub>a2</sub></b> | <b>pK<sub>a3</sub></b> | <b>pK<sub>a4</sub></b> |                        | <b>pK<sub>a1</sub></b> | <b>pK<sub>a2</sub></b> | <b>pK<sub>a3</sub></b> | <b>pK<sub>a4</sub></b> |                        |
| Yasuda–Shedlovsky     | 2.09                   | 4.19                   | 9.85                   | 11.87                  |                        | 2.15                   | 4.1                    | 9.2                    | 11.86                  |                        | 2.13                   | 4.04                   | 8.31                   | 11.79                  |                        |
| Linear                | 2.32                   | 4.62                   | 10.34                  | 12                     |                        | 2.4                    | 4.49                   | 9.57                   | 11.99                  |                        | 2.47                   | 4.49                   | 8.69                   | 11.89                  |                        |

|                    |                        |                        |                        |              |                        |                        |                        |              |                        |                        |                        |              |
|--------------------|------------------------|------------------------|------------------------|--------------|------------------------|------------------------|------------------------|--------------|------------------------|------------------------|------------------------|--------------|
| <b>98.0% THF</b>   |                        |                        |                        |              |                        |                        |                        |              |                        |                        |                        |              |
| Yasuda–Shedlovsky  | -1.15                  | -2.74                  | 1.65                   | 10.26        | -1.32                  | -2.33                  | 3.04                   | 10.34        | -3.48                  | -3.47                  | 2.2                    | 10.79        |
| Linear             | 1.16                   | 2.06                   | 7.33                   | 11.46        | 1.12                   | 2.13                   | 7.33                   | 11.49        | 0.45                   | 1.73                   | 6.44                   | 11.59        |
| <b>99.99% THF</b>  |                        |                        |                        |              |                        |                        |                        |              |                        |                        |                        |              |
| Yasuda–Shedlovsky  | 0.86                   | -0.95                  | 3.37                   | 12.36        | 0.68                   | -0.5                   | 4.88                   | 12.45        | -1.61                  | -1.71                  | 4.05                   | 12.94        |
| <b>Linear</b>      | <b>1.13</b>            | <b>2.01</b>            | <b>7.26</b>            | <b>11.45</b> | <b>1.09</b>            | <b>2.08</b>            | <b>7.29</b>            | <b>11.47</b> | <b>0.41</b>            | <b>1.67</b>            | <b>6.4</b>             | <b>11.58</b> |
| <b>0% DMSO</b>     |                        |                        |                        |              |                        |                        |                        |              |                        |                        |                        |              |
| Yasuda–Shedlovsky  | <b>pK<sub>a1</sub></b> | <b>pK<sub>a2</sub></b> | <b>pK<sub>a3</sub></b> |              | <b>pK<sub>a1</sub></b> | <b>pK<sub>a2</sub></b> | <b>pK<sub>a3</sub></b> |              | <b>pK<sub>a1</sub></b> | <b>pK<sub>a2</sub></b> | <b>pK<sub>a3</sub></b> |              |
| Yasuda–Shedlovsky  | 2.01                   | 4.08                   | 9.33                   |              | 1.97                   | 4.04                   | 8.84                   |              | 1.92                   | 3.99                   | 7.89                   |              |
| Linear             | 2.21                   | 4.34                   | 9.47                   |              | 2.17                   | 4.33                   | 9.01                   |              | 2.12                   | 4.35                   | 8.04                   |              |
| <b>98.0% DMSO</b>  |                        |                        |                        |              |                        |                        |                        |              |                        |                        |                        |              |
| Yasuda–Shedlovsky  | -1.44                  | -0.55                  | 6.84                   |              | -1.42                  | -0.93                  | 6.08                   |              | -1.38                  | -2.45                  | 5.41                   |              |
| Linear             | 1.25                   | 2.99                   | 8.84                   |              | 1.23                   | 2.87                   | 8.27                   |              | 1.21                   | 2.44                   | 7.39                   |              |
| <b>99.99% DMSO</b> |                        |                        |                        |              |                        |                        |                        |              |                        |                        |                        |              |
| Yasuda–Shedlovsky  | 0.39                   | 1.16                   | 8.75                   |              | 0.41                   | 0.75                   | 7.97                   |              | 0.46                   | -0.91                  | 7.33                   |              |
| <b>Linear</b>      | <b>1.23</b>            | <b>2.97</b>            | <b>8.82</b>            |              | <b>1.21</b>            | <b>2.84</b>            | <b>8.25</b>            |              | <b>1.19</b>            | <b>2.41</b>            | <b>7.38</b>            |              |

Table S3. The measured pK<sub>a</sub> values of cinchona squaramides in six different solvents.

|                      | HQ–SQ            |                  |                  |                  |                  | Q–SQ             |                  |                  |                  | DQ–SQ            |                  |                  |                  |
|----------------------|------------------|------------------|------------------|------------------|------------------|------------------|------------------|------------------|------------------|------------------|------------------|------------------|------------------|
| Water                | pK <sub>a1</sub> | pK <sub>a2</sub> | pK <sub>a3</sub> | pK <sub>a4</sub> | pK <sub>a5</sub> | pK <sub>a1</sub> | pK <sub>a2</sub> | pK <sub>a3</sub> | pK <sub>a4</sub> | pK <sub>a1</sub> | pK <sub>a2</sub> | pK <sub>a3</sub> | pK <sub>a4</sub> |
|                      | 3.50             | 6.68             | 7.86             | 9.57             | 11.73            | 3.23             | 6.95             | 9.29             |                  | 3.21             | 6.13             | 9.20             |                  |
| <b>0% MeOH</b>       |                  |                  |                  |                  |                  |                  |                  |                  |                  |                  |                  |                  |                  |
| Yasuda–Shedlovsky    | pK <sub>a1</sub> | pK <sub>a2</sub> | pK <sub>a3</sub> | pK <sub>a4</sub> | pK <sub>a5</sub> | pK <sub>a1</sub> | pK <sub>a2</sub> | pK <sub>a3</sub> |                  | pK <sub>a1</sub> | pK <sub>a2</sub> | pK <sub>a3</sub> |                  |
| Yasuda–Shedlovsky    | 3.28             | 6.62             | 7.82             | 9.52             | 11.86            | 3.23             | 6.95             | 9.29             |                  | 3.21             | 6.13             | 9.20             |                  |
| Linear               | 3.50             | 6.68             | 7.86             | 9.57             | 11.73            | 3.45             | 7.12             | 9.29             |                  | 3.43             | 6.30             | 9.19             |                  |
| <b>98.0% MeOH</b>    |                  |                  |                  |                  |                  |                  |                  |                  |                  |                  |                  |                  |                  |
| Yasuda–Shedlovsky    | 1.57             | 6.71             | 8.34             | 9.94             | 14.08            | 1.69             | 6.00             | 10.19            |                  | 1.54             | 5.11             | 10.23            |                  |
| Linear               | 1.82             | 6.30             | 7.77             | 9.40             | 12.93            | 1.83             | 5.95             | 9.49             |                  | 1.74             | 5.08             | 9.48             |                  |
| <b>99.99% MeOH</b>   |                  |                  |                  |                  |                  |                  |                  |                  |                  |                  |                  |                  |                  |
| Yasuda–Shedlovsky    | 3.68             | 8.92             | 10.57            | 12.17            | 16.40            | 3.80             | 8.15             | 12.44            |                  | 3.64             | 7.25             | 12.49            |                  |
| <b>Linear</b>        | <b>1.79</b>      | <b>6.30</b>      | <b>7.77</b>      | <b>9.40</b>      | <b>12.96</b>     | <b>1.79</b>      | <b>5.93</b>      | <b>9.49</b>      |                  | <b>1.71</b>      | <b>5.06</b>      | <b>9.49</b>      |                  |
| <b>0% MeCN</b>       |                  |                  |                  |                  |                  |                  |                  |                  |                  |                  |                  |                  |                  |
| Yasuda–Shedlovsky    | pK <sub>a1</sub> |                  | pK <sub>a2</sub> | pK <sub>a3</sub> |                  | pK <sub>a1</sub> | pK <sub>a2</sub> | pK <sub>a3</sub> |                  | pK <sub>a1</sub> | pK <sub>a2</sub> | pK <sub>a3</sub> |                  |
| Yasuda–Shedlovsky    | 3.06             |                  | 7.61             | 9.38             |                  | 2.95             | 7.17             | 9.18             |                  | 2.91             | 6.17             | 9.08             |                  |
| Linear               | 3.19             |                  | 7.63             | 9.29             |                  | 3.07             | 7.21             | 9.06             |                  | 3.04             | 6.25             | 8.95             |                  |
| <b>98.0% MeCN</b>    |                  |                  |                  |                  |                  |                  |                  |                  |                  |                  |                  |                  |                  |
| Yasuda–Shedlovsky    | 3.14             |                  | 8.85             | 12.01            |                  | 3.17             | 8.27             | 12.15            |                  | 3.04             | 6.90             | 12.22            |                  |
| Linear               | 2.04             |                  | 7.74             | 10.86            |                  | 2.07             | 7.16             | 11.00            |                  | 1.94             | 5.79             | 11.06            |                  |
| <b>99.99% MeCN</b>   |                  |                  |                  |                  |                  |                  |                  |                  |                  |                  |                  |                  |                  |
| Yasuda–Shedlovsky    | 5.47             |                  | 11.16            | 14.30            |                  | 5.50             | 10.58            | 14.44            |                  | 5.36             | 9.21             | 14.51            |                  |
| <b>Linear</b>        | <b>2.01</b>      |                  | <b>7.74</b>      | <b>10.89</b>     |                  | <b>2.05</b>      | <b>7.16</b>      | <b>11.04</b>     |                  | <b>1.91</b>      | <b>5.78</b>      | <b>11.10</b>     |                  |
| <b>0% Dioxane</b>    |                  |                  |                  |                  |                  |                  |                  |                  |                  |                  |                  |                  |                  |
| Yasuda–Shedlovsky    | pK <sub>a1</sub> |                  | pK <sub>a2</sub> | pK <sub>a3</sub> |                  | pK <sub>a1</sub> | pK <sub>a2</sub> | pK <sub>a3</sub> |                  | pK <sub>a1</sub> | pK <sub>a2</sub> | pK <sub>a3</sub> |                  |
| Yasuda–Shedlovsky    | 2.91             |                  | 7.28             | 9.22             |                  | 2.80             | 6.88             | 9.16             |                  | 2.64             | 5.49             | 9.10             |                  |
| Linear               | 3.36             |                  | 7.18             | 8.74             |                  | 3.21             | 6.77             | 8.65             |                  | 2.96             | 5.03             | 8.59             |                  |
| <b>98.0% Dioxane</b> |                  |                  |                  |                  |                  |                  |                  |                  |                  |                  |                  |                  |                  |
| Yasuda–Shedlovsky    | -13.31           |                  | 8.89             | 24.70            |                  | -10.69           | 9.23             | 24.50            |                  | -7.93            | 18.35            | 24.34            |                  |



|                       |             |             |              |             |             |              |             |             |              |
|-----------------------|-------------|-------------|--------------|-------------|-------------|--------------|-------------|-------------|--------------|
| Yasuda–Shedlovsky     | 5.63        | 11.19       | 16.71        | 5.57        | 10.65       | 16.72        | 5.51        | 9.47        | 16.78        |
| <b>Linear</b>         | <b>2.15</b> | <b>7.73</b> | <b>13.36</b> | <b>2.12</b> | <b>7.21</b> | <b>13.33</b> | <b>2.05</b> | <b>6.03</b> | <b>13.39</b> |
| <b>0% Dioxane</b>     |             |             |              |             |             |              |             |             |              |
| Yasuda–Shedlovsky     | 3.15        | 7.69        | 11.03        | 3.11        | 7.74        | 10.96        | 3.20        | 7.79        | 11.15        |
| Linear                | 3.73        | 7.65        | 10.55        | 3.65        | 8.10        | 10.42        | 3.74        | 8.57        | 11.00        |
| <b>98.0% Dioxane</b>  |             |             |              |             |             |              |             |             |              |
| Yasuda–Shedlovsky     | -11.96      | 8.04        | 22.55        | -10.82      | -1.90       | 24.11        | -14.11      | -19.48      | 18.32        |
| Linear                | 1.79        | 8.19        | 12.88        | 1.89        | 7.04        | 12.99        | 1.71        | 5.26        | 12.30        |
| <b>99.99% Dioxane</b> |             |             |              |             |             |              |             |             |              |
| Yasuda–Shedlovsky     | -15.65      | 9.87        | 28.36        | -14.09      | -3.64       | 30.50        | -18.59      | -27.51      | 22.58        |
| <b>Linear</b>         | <b>1.75</b> | <b>8.20</b> | <b>12.93</b> | <b>1.85</b> | <b>7.02</b> | <b>13.04</b> | <b>1.67</b> | <b>5.20</b> | <b>12.33</b> |
| <b>0% THF</b>         |             |             |              |             |             |              |             |             |              |
| Yasuda–Shedlovsky     | 2.96        | 7.95        | 11.06        | 2.87        | 7.47        | 11.03        | 2.64        | 6.79        | 10.87        |
| Linear                | 3.50        | 8.44        | 10.74        | 3.37        | 8.02        | 10.72        | 3.50        | 7.56        | 10.44        |
| <b>98.0% THF</b>      |             |             |              |             |             |              |             |             |              |
| Yasuda–Shedlovsky     | -3.53       | 1.86        | 16.46        | -3.03       | 0.80        | 16.28        | -1.46       | -3.14       | 17.69        |
| Linear                | 0.81        | 5.95        | 13.00        | 0.91        | 5.26        | 12.93        | 1.22        | 3.48        | 13.32        |
| <b>99.99% THF</b>     |             |             |              |             |             |              |             |             |              |
| Yasuda–Shedlovsky     | -1.70       | 3.71        | 18.97        | -1.17       | 2.61        | 18.79        | 0.31        | -1.52       | 20.28        |
| <b>Linear</b>         | <b>0.75</b> | <b>5.90</b> | <b>13.05</b> | <b>0.86</b> | <b>5.20</b> | <b>12.97</b> | <b>1.18</b> | <b>3.40</b> | <b>13.38</b> |
| <b>0% DMSO</b>        |             |             |              |             |             |              |             |             |              |
| Yasuda–Shedlovsky     | 3.22        | 8.30        | 10.52        | 3.30        | 7.77        | 10.65        | 3.32        | 6.82        | 10.51        |
| Linear                | 3.78        | 8.55        | 10.35        | 3.72        | 7.98        | 10.65        | 3.74        | 7.07        | 10.46        |
| <b>98.0% DMSO</b>     |             |             |              |             |             |              |             |             |              |
| Yasuda–Shedlovsky     | -2.98       | 5.87        | 13.17        | -3.82       | 5.01        | 11.27        | -4.65       | 2.29        | 12.10        |
| Linear                | 1.45        | 7.67        | 11.44        | 1.52        | 7.14        | 10.95        | 1.37        | 5.78        | 11.07        |
| <b>99.99% DMSO</b>    |             |             |              |             |             |              |             |             |              |
| Yasuda–Shedlovsky     | -1.41       | 7.79        | 15.56        | -2.34       | 6.90        | 13.48        | -3.24       | 4.01        | 14.39        |
| <b>Linear</b>         | <b>1.41</b> | <b>7.66</b> | <b>11.46</b> | <b>1.47</b> | <b>7.12</b> | <b>10.96</b> | <b>1.33</b> | <b>5.76</b> | <b>11.09</b> |

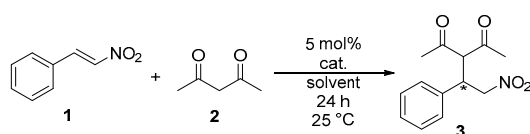

Scheme S1. Michael Addition of pentane-2,4-dione (2) to trans-β-nitrostyrene (1)

**Table S5.** Catalysts applied in Michael addition using *trans*-β-nitrostyrene (1) and pentane-2,4-dione (2)<sup>a</sup>.

| Entry | Catalyst | Solvent | Yield [%] <sup>b</sup> | ee [%] <sup>c</sup> |
|-------|----------|---------|------------------------|---------------------|
| 1     | HQ       | DCM     | 98                     | -16                 |
| 2     | HQ       | MTBE    | 99                     | -8                  |
| 3     | HQ       | toluene | 98                     | -21                 |
| 4     | HQ       | MeCN    | 97                     | 4                   |

| 5     | <b>HQ</b>   | EtOAc   | 99                     | −8                  |
|-------|-------------|---------|------------------------|---------------------|
| 6     | <b>HQ</b>   | MeOH    | 91                     | −3                  |
| 7     | <b>HQ</b>   | THF     | 96                     | −18                 |
| 8     | <b>Q</b>    | DCM     | 98                     | −15                 |
| 9     | <b>Q</b>    | MTBE    | 99                     | −6                  |
| 10    | <b>Q</b>    | toluene | 99                     | −14                 |
| 11    | <b>Q</b>    | MeCN    | 97                     | 1                   |
| 12    | <b>Q</b>    | EtOAc   | 97                     | 2                   |
| 13    | <b>Q</b>    | MeOH    | 91                     | −2                  |
| 14    | <b>Q</b>    | THF     | 93                     | −8                  |
| 15    | <b>DQ</b>   | DCM     | 99                     | −13                 |
| 16    | <b>DQ</b>   | MTBE    | 98                     | 7                   |
| 17    | <b>DQ</b>   | toluene | 87                     | −15                 |
| 18    | <b>DQ</b>   | MeCN    | 99                     | 1                   |
| 19    | <b>DQ</b>   | EtOAc   | 100                    | 9                   |
| 20    | <b>DQ</b>   | MeOH    | 82                     | 0                   |
| 21    | <b>DQ</b>   | THF     | 97                     | −7                  |
| Entry | Catalyst    | Solvent | Yield [%] <sup>b</sup> | ee [%] <sup>c</sup> |
| 1     | <b>HQ-N</b> | DCM     | 99                     | 6                   |
| 2     | <b>HQ-N</b> | MTBE    | 98                     | 5                   |
| 3     | <b>HQ-N</b> | toluene | 99                     | 11                  |
| 4     | <b>HQ-N</b> | MeCN    | 99                     | 4                   |
| 5     | <b>HQ-N</b> | EtOAc   | 99                     | 6                   |
| 6     | <b>HQ-N</b> | MeOH    | 95                     | 5                   |
| 7     | <b>HQ-N</b> | THF     | 97                     | 15                  |
| 8     | <b>Q-N</b>  | DCM     | 86                     | 12                  |
| 9     | <b>Q-N</b>  | MTBE    | 92                     | 7                   |
| 10    | <b>Q-N</b>  | toluene | 71                     | 11                  |
| 11    | <b>Q-N</b>  | MeCN    | 91                     | 7                   |
| 12    | <b>Q-N</b>  | EtOAc   | 88                     | 10                  |
| 13    | <b>Q-N</b>  | MeOH    | 87                     | 4                   |
| 14    | <b>Q-N</b>  | THF     | 94                     | 9                   |
| 15    | <b>DQ-N</b> | DCM     | 85                     | 5                   |
| 16    | <b>DQ-N</b> | MTBE    | 83                     | 7                   |
| 17    | <b>DQ-N</b> | toluene | 89                     | 34                  |
| 18    | <b>DQ-N</b> | MeCN    | 97                     | 3                   |
| 19    | <b>DQ-N</b> | EtOAc   | 74                     | 6                   |
| 20    | <b>DQ-N</b> | MeOH    | 87                     | 3                   |
| 21    | <b>DQ-N</b> | THF     | 90                     | 3                   |

<sup>a</sup> Reaction conditions: Pentane-2,4-dione (**2**) (0.41 mmol) was added to the solution of *trans*- $\beta$ -nitrostyrene (**1**) (0.16 mmol) and 5 mol% catalysts in 1 mL of solvent, then the resulting

mixture was stirred at room temperature for 24 hours.<sup>b</sup> Isolated yields. <sup>c</sup> Determined by chiral HPLC (plus marks *S* enantiomer, minus marks *R* enantiomer).

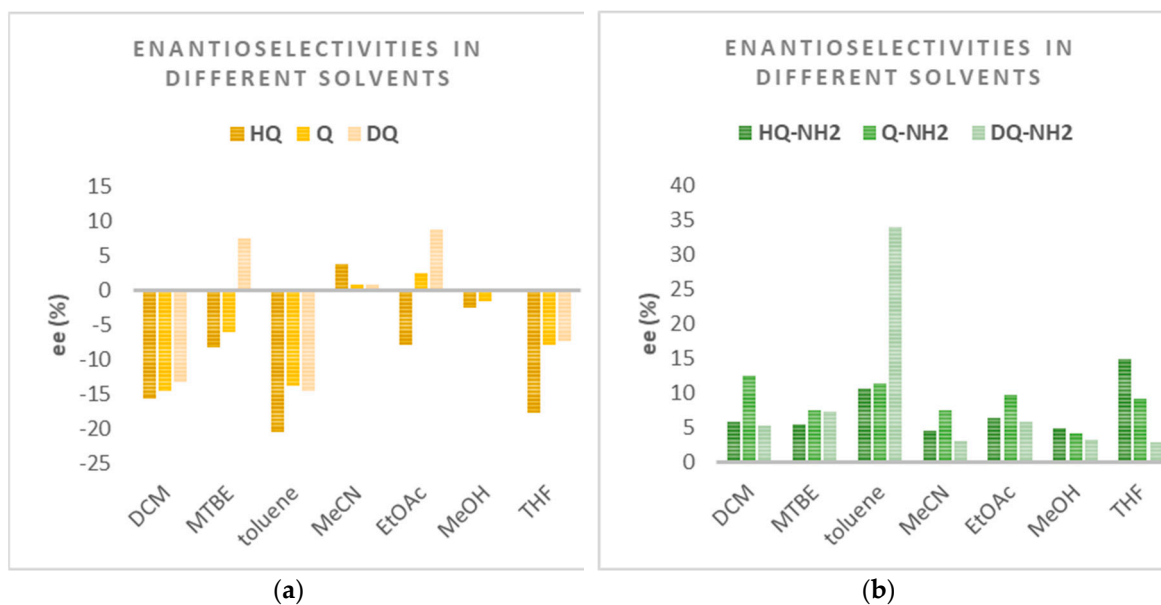

**Figure S1.** The dependence of enantiomeric excesses in different solvents when hydroxyl (a) or amino derivatives (b) were applied in Michael addition determined by chiral HPLC (plus marks *S* enantiomer, minus marks *R* enantiomer).

## 2. FT-IR Spectra of the New Compounds



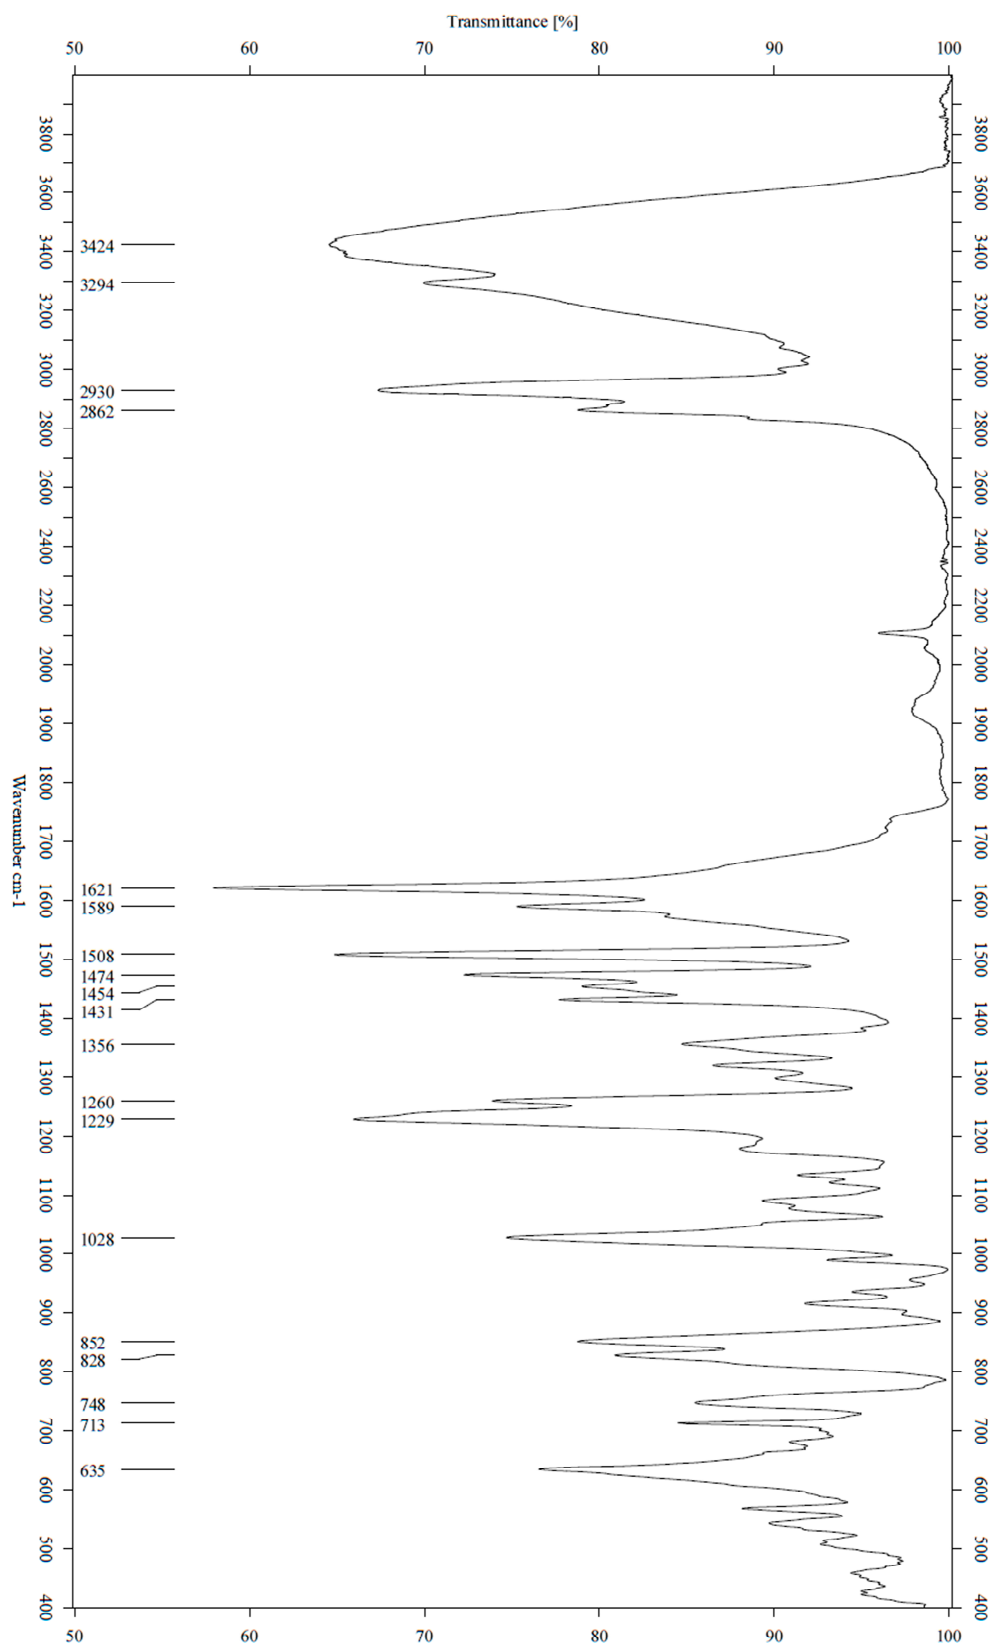

Figure S2. FT-IR Spectrum of DQ-NH (in KBr).

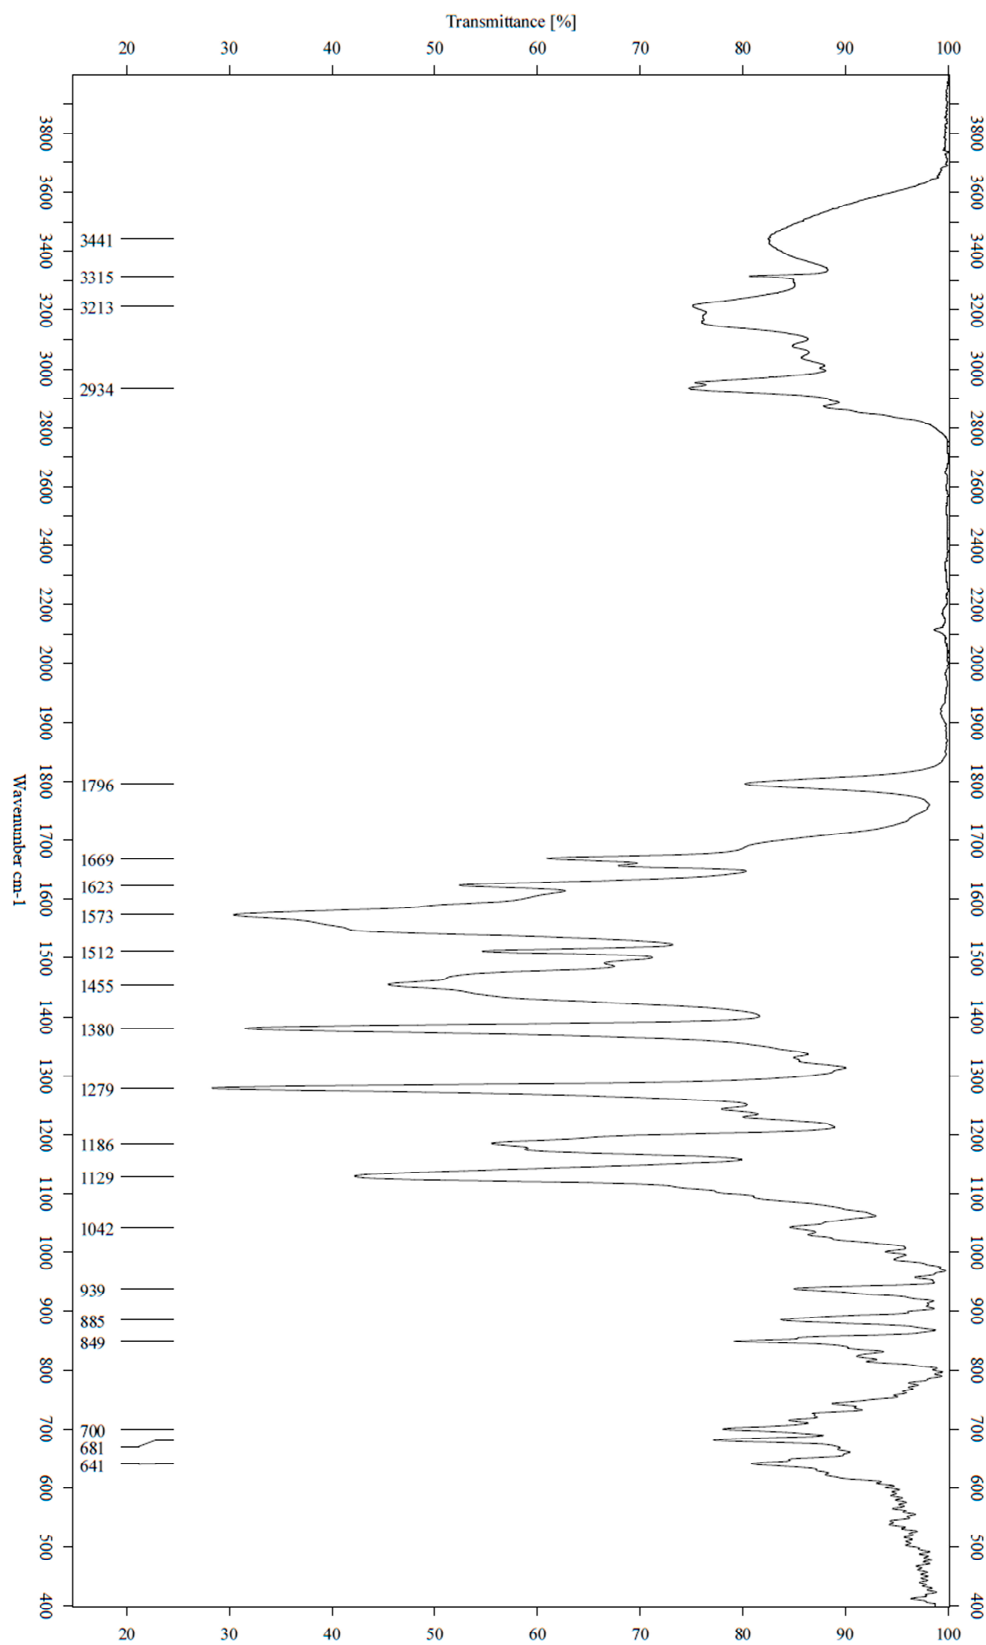

Figure S3. FT-IR Spectrum of DQ-SQ (in KBr).

### 3. NMR Spectra of the New Compounds

#### 3.1. NMR Spectra of DQ-N

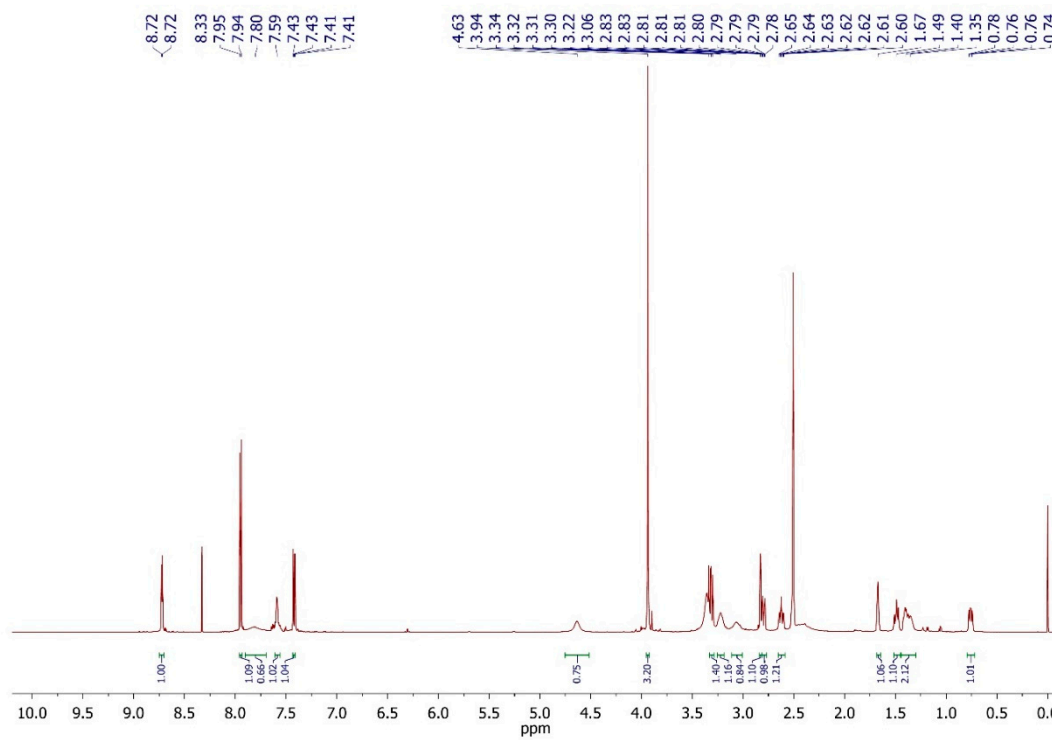

Figure S4a.  $^1\text{H}$  NMR Spectrum of DQ-N (600 MHz, DMSO, 25 °C).

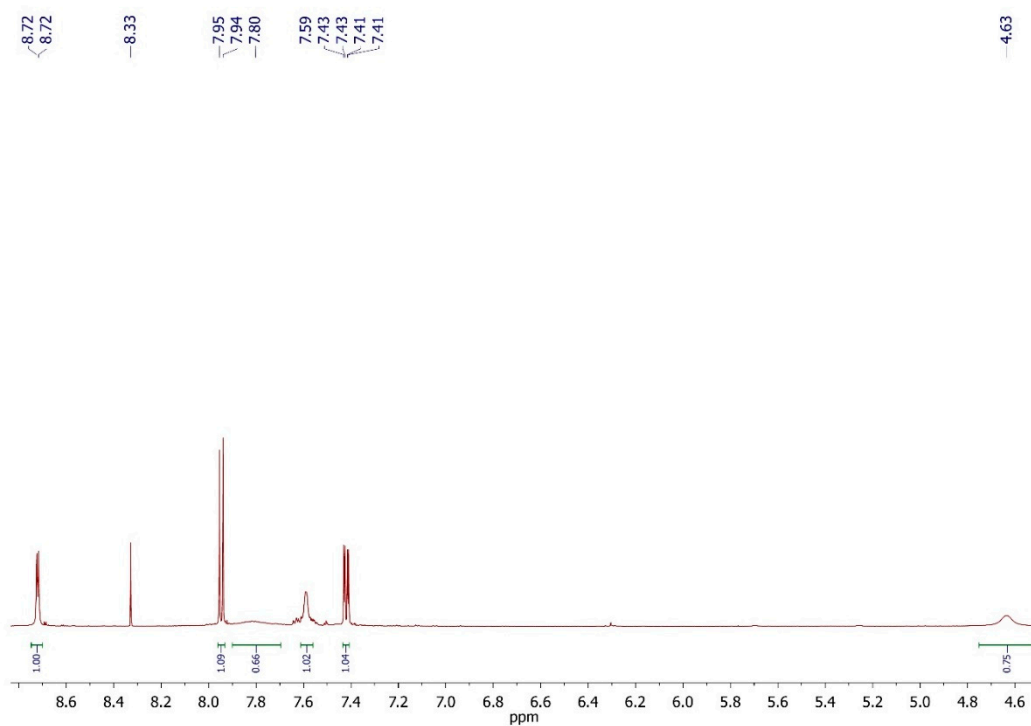

Figure S4b.  $^1\text{H}$  NMR Spectrum of DQ-N in a range between 8.8 and 4.5 ppm (600 MHz, DMSO, 25°C).

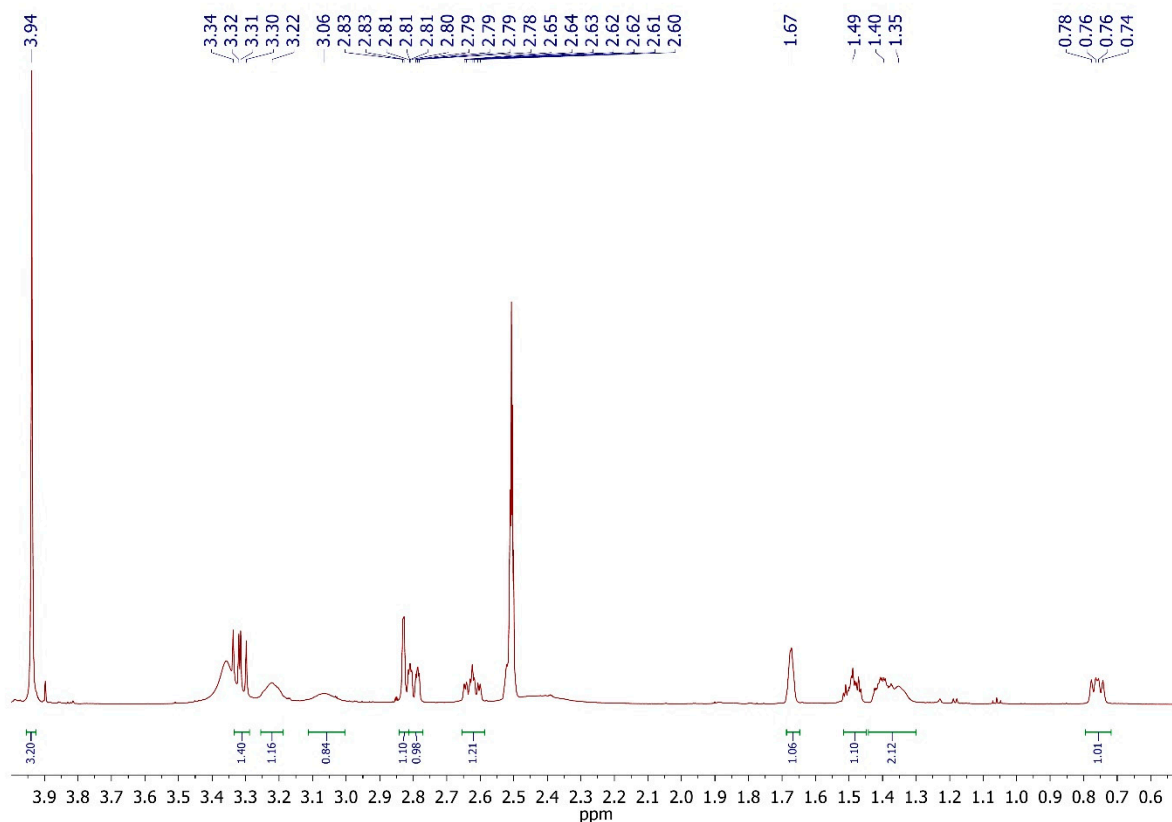

Figure S4c. <sup>1</sup>H NMR Spectrum of DQ-N in a range between 4.0 and 0.5 ppm (600 MHz, DMSO, 25°C).

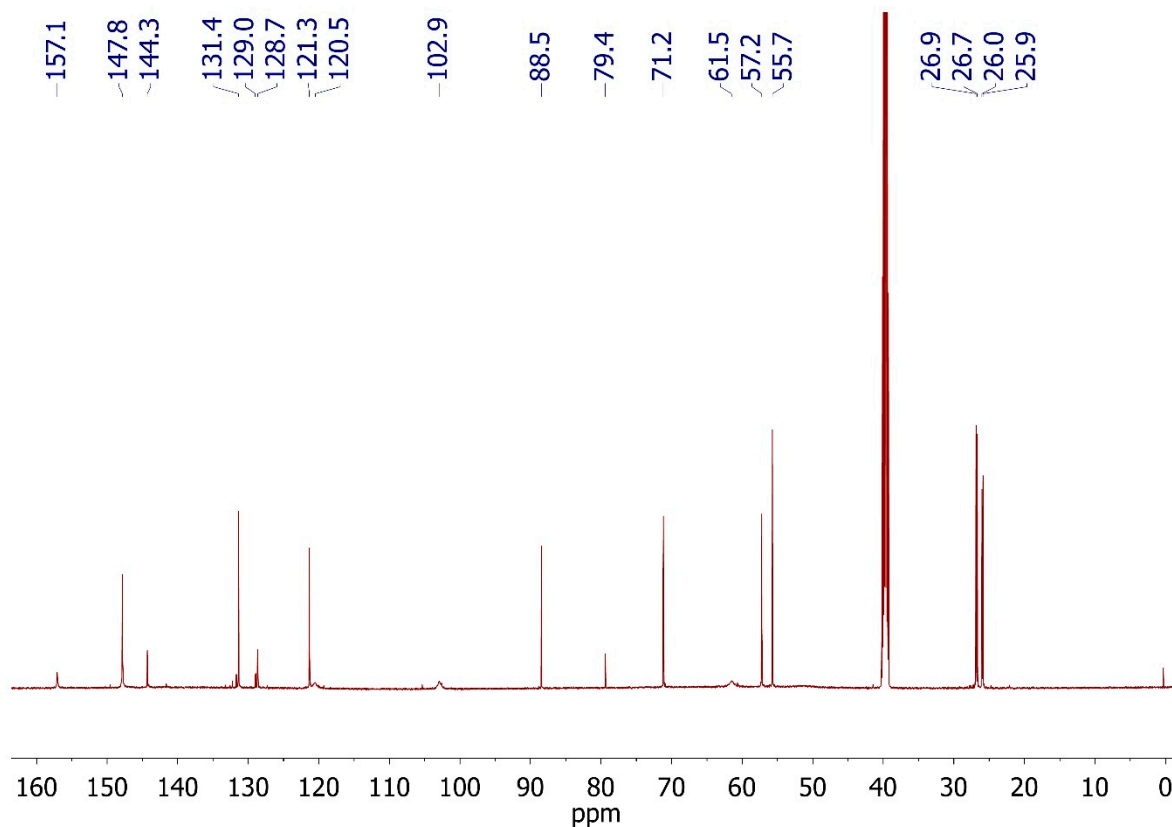

**Figure S5.**  $^{13}\text{C}$  NMR Spectrum of DQ-N (150 MHz, DMSO, 25 °C).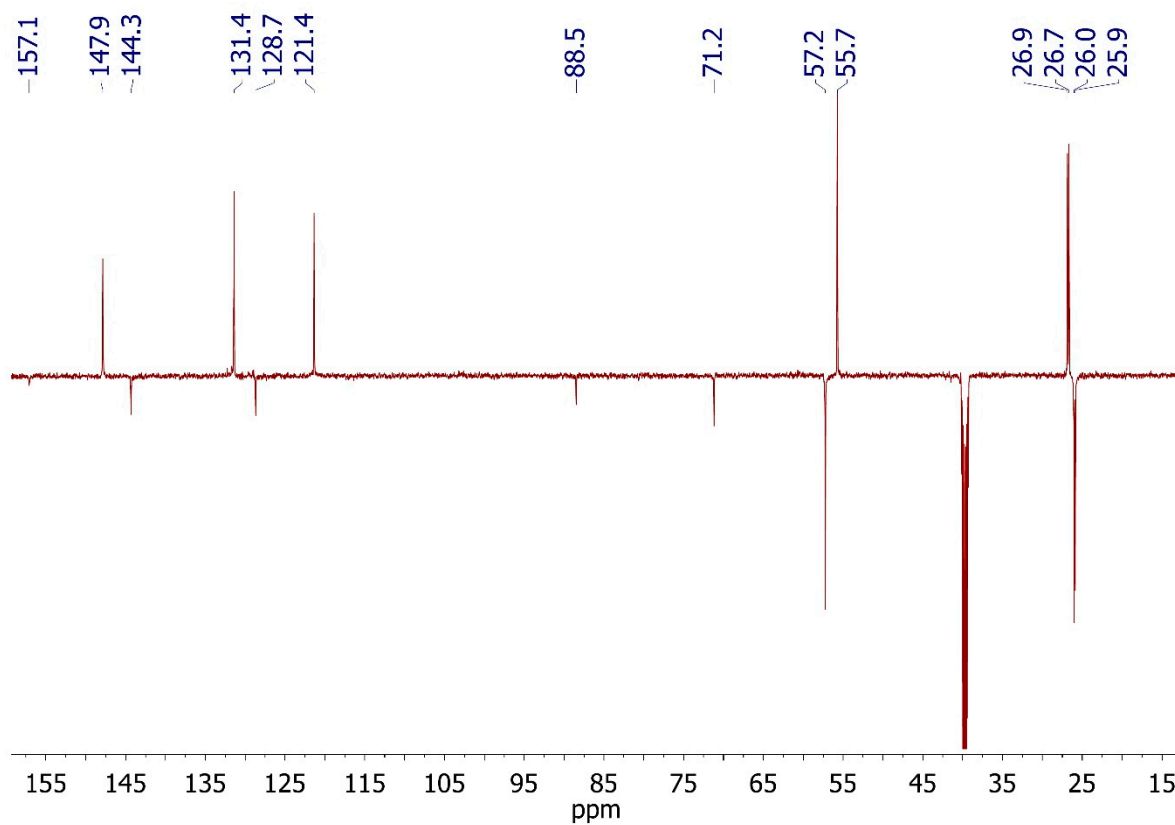**Figure S6.**  $^{13}\text{C}$  DEPT NMR Spectrum of DQ-N (150 MHz, DMSO, 25 °C).

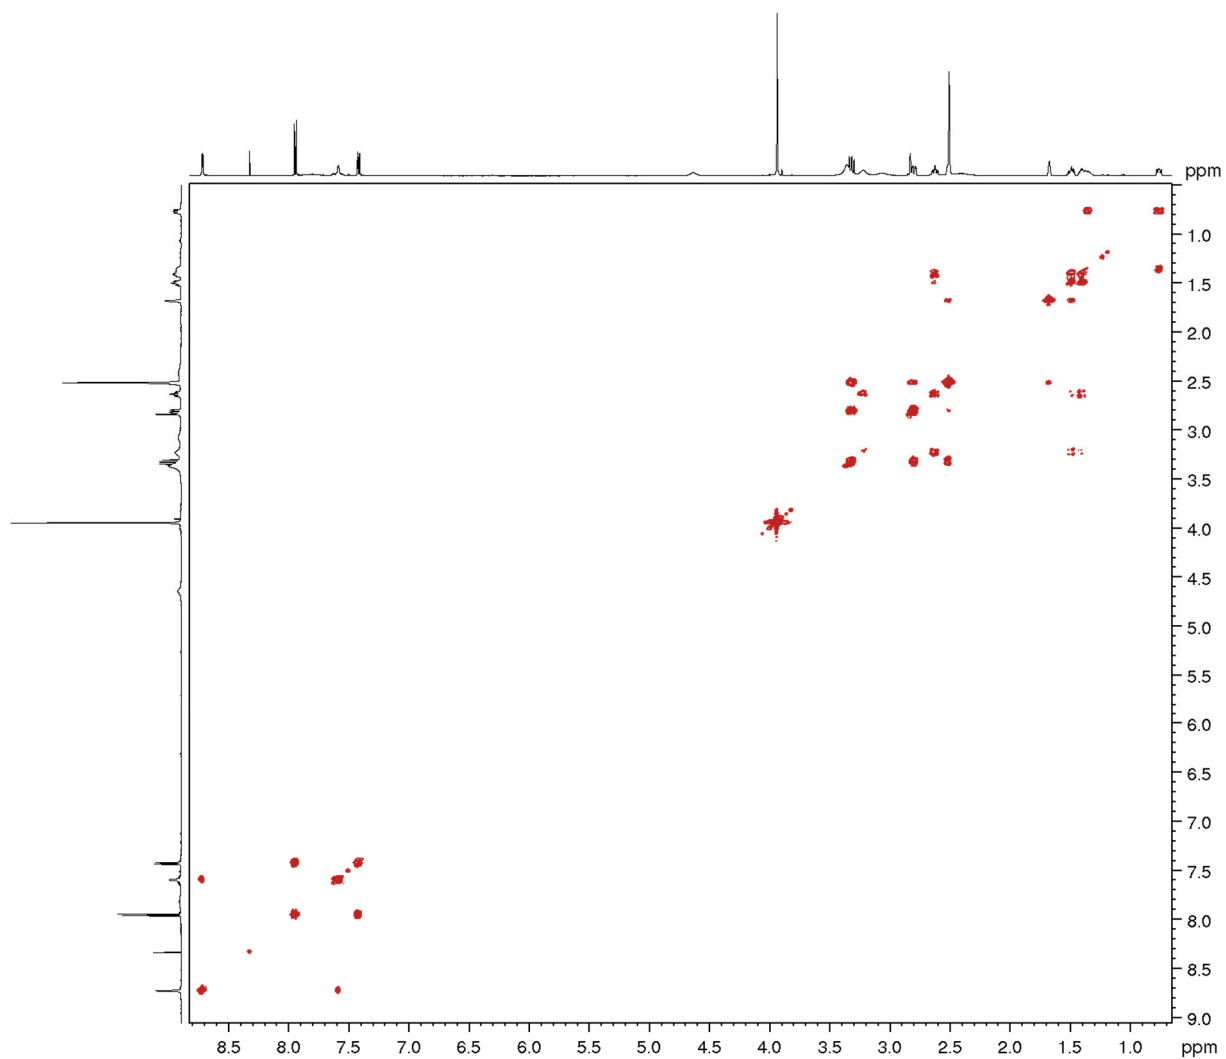

Figure S7. COSY NMR Spectrum of DQ-N (DMSO, 25 °C).

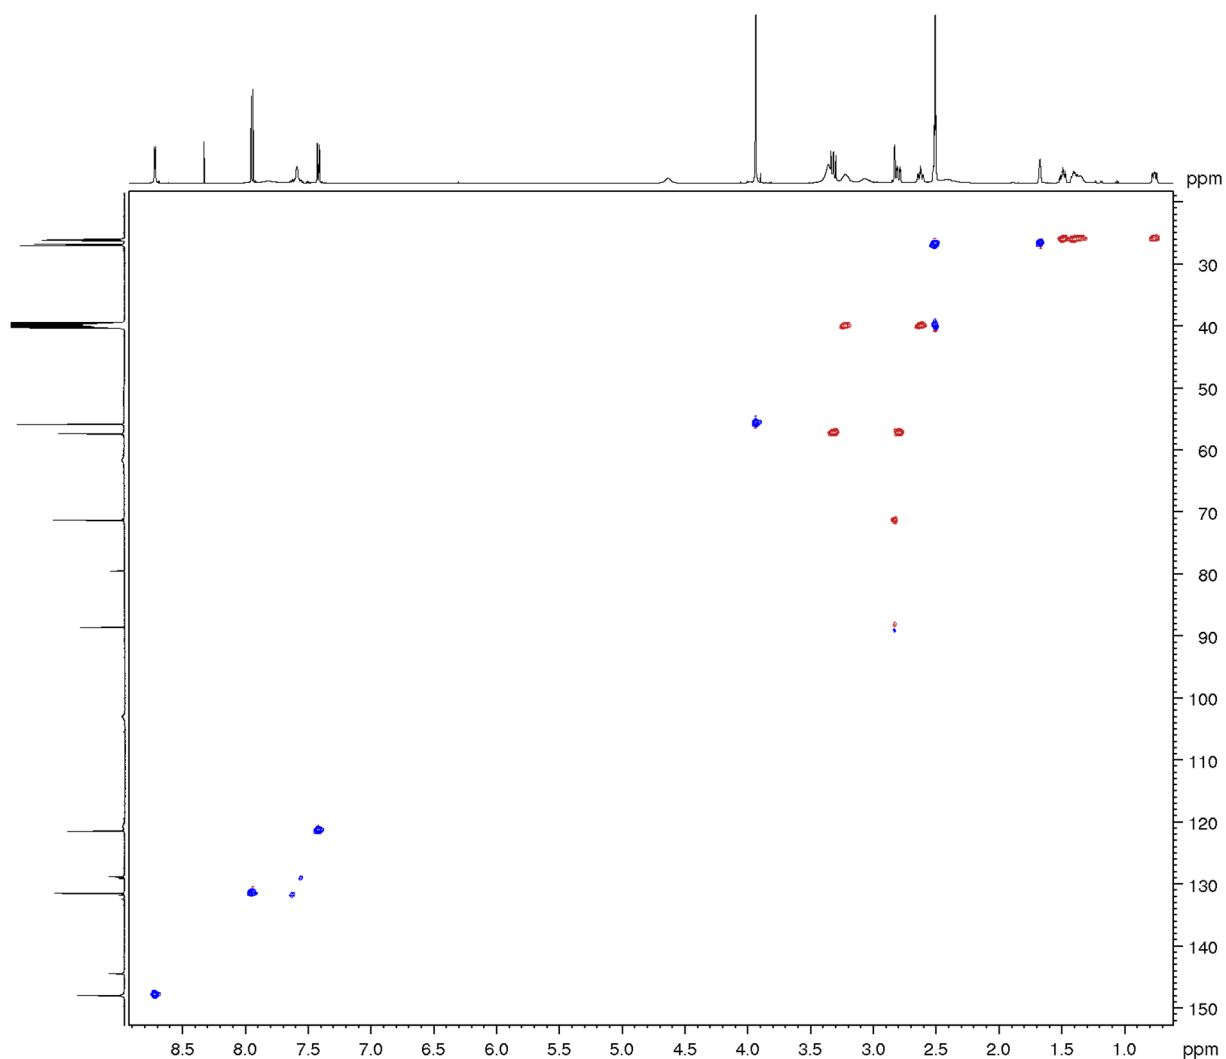

Figure S8. Edited HSQC NMR Spectrum of DQ-N (DMSO, 25 °C).

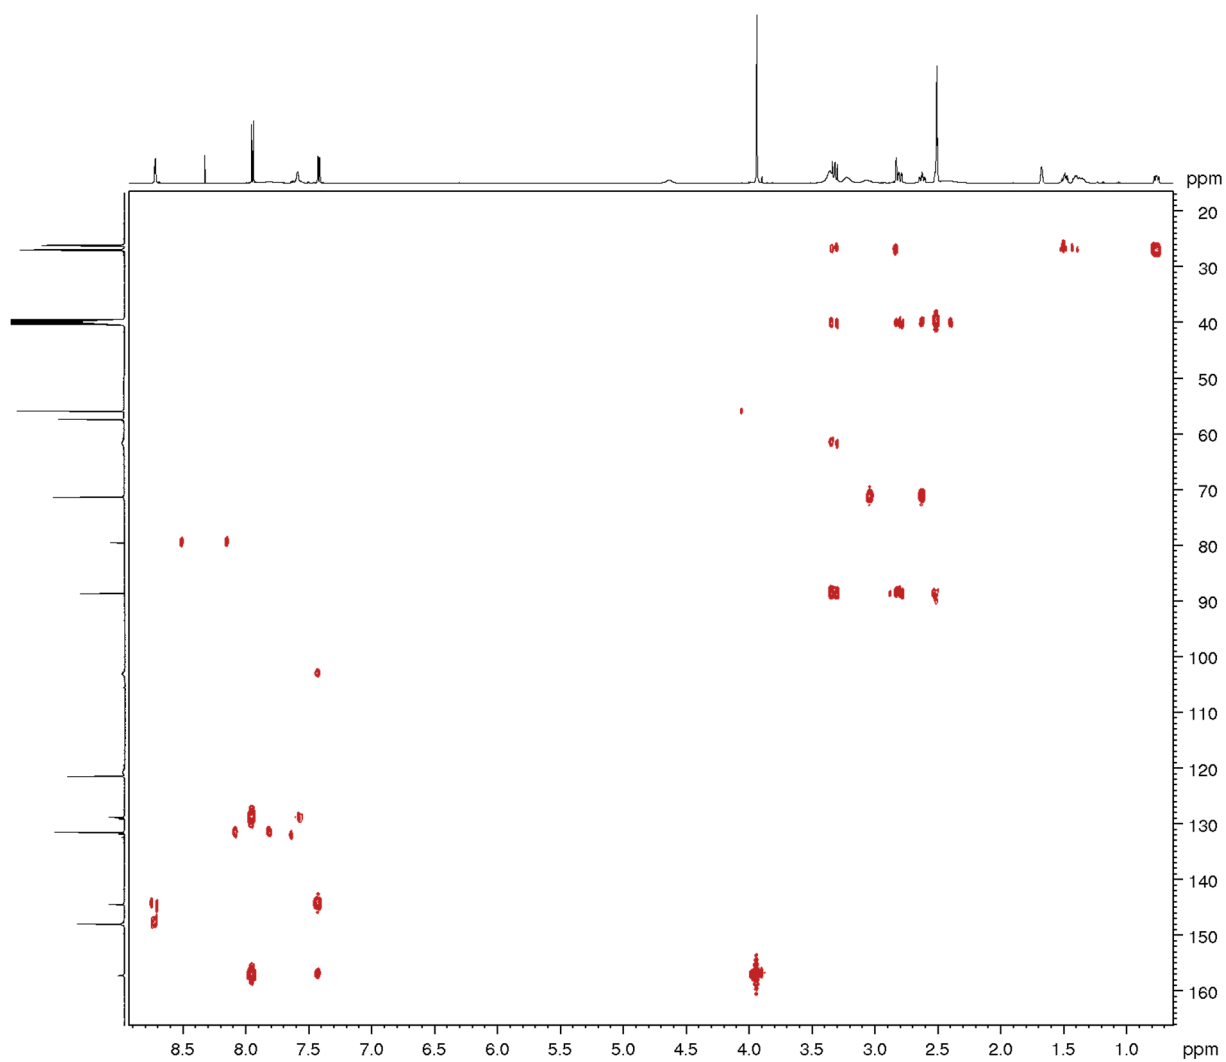

Figure S9. HMBC NMR Spectrum of DQ-N (DMSO, 25 °C).



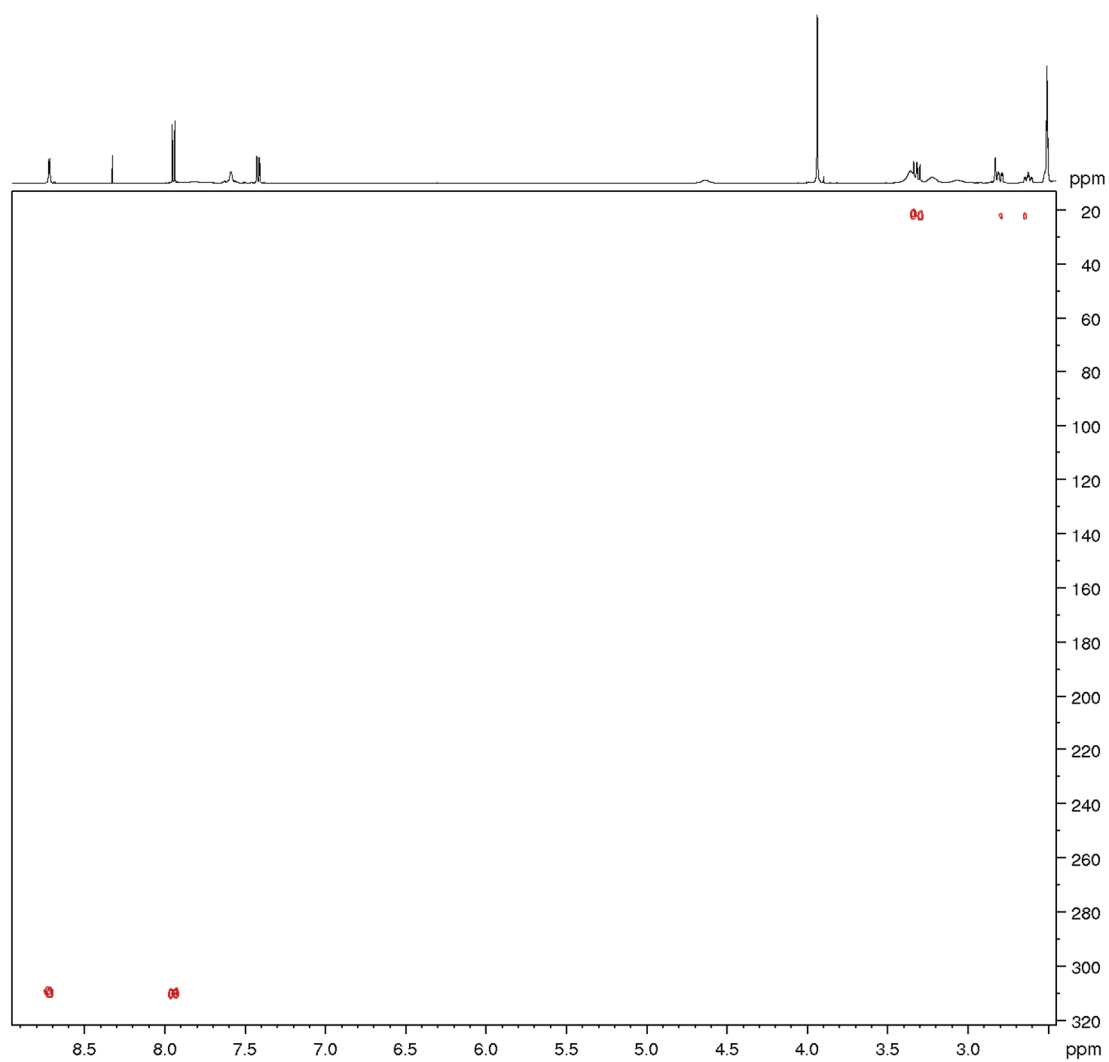

**Figure S10.** <sup>15</sup>N HMBC NMR Spectrum of DQ-N (DMSO, 25 °C).

### 3.2. NMR Spectra of DQ-SQ

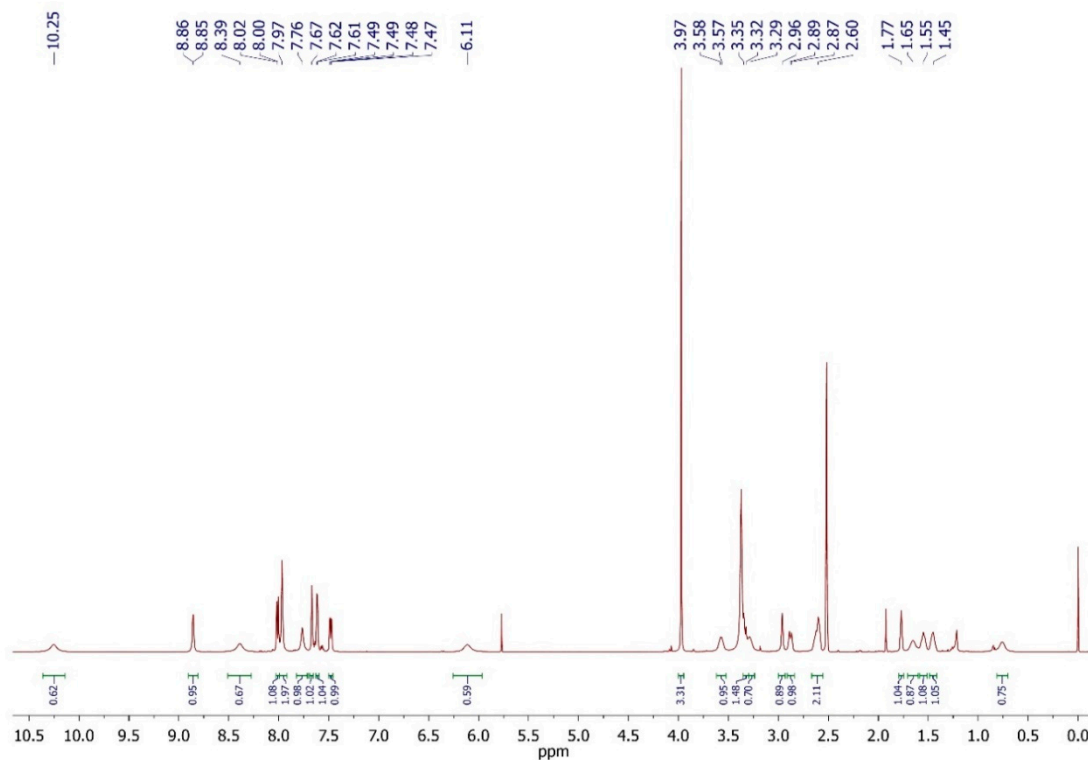

Figure S11a. NMR Spectrum of DQ-SQ (600 MHz, DMSO, 25 °C).

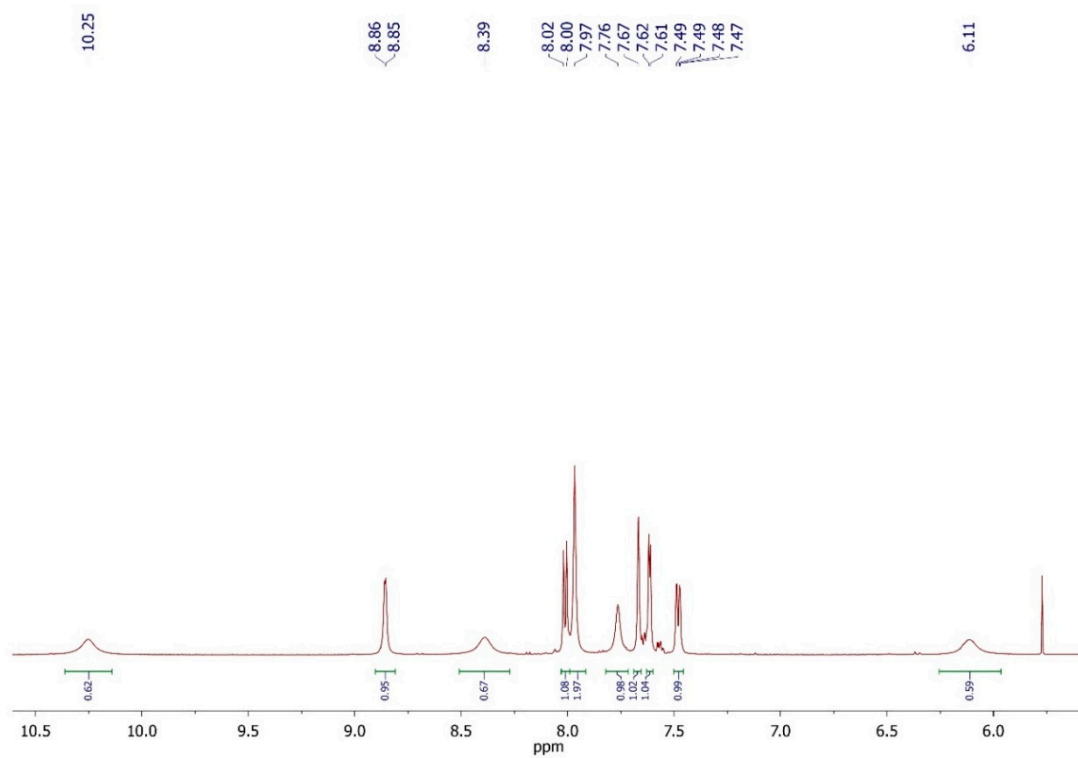

Figure S11b. NMR Spectrum of DQ-SQ in a range between 10.5 and 5.0 ppm (600 MHz, DMSO, 25 °C).

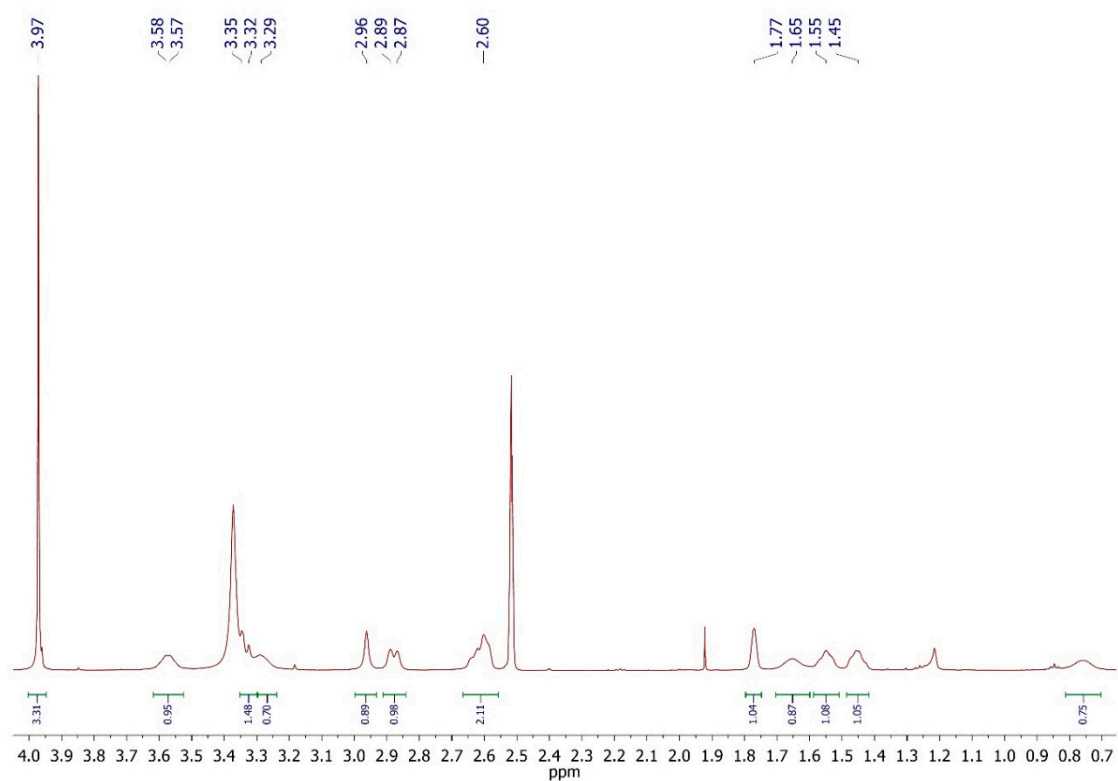

Figure S11c. NMR Spectrum of DQ-SQ in a range between 4.1 and 0.7 ppm (600 MHz, DMSO, 25°C).

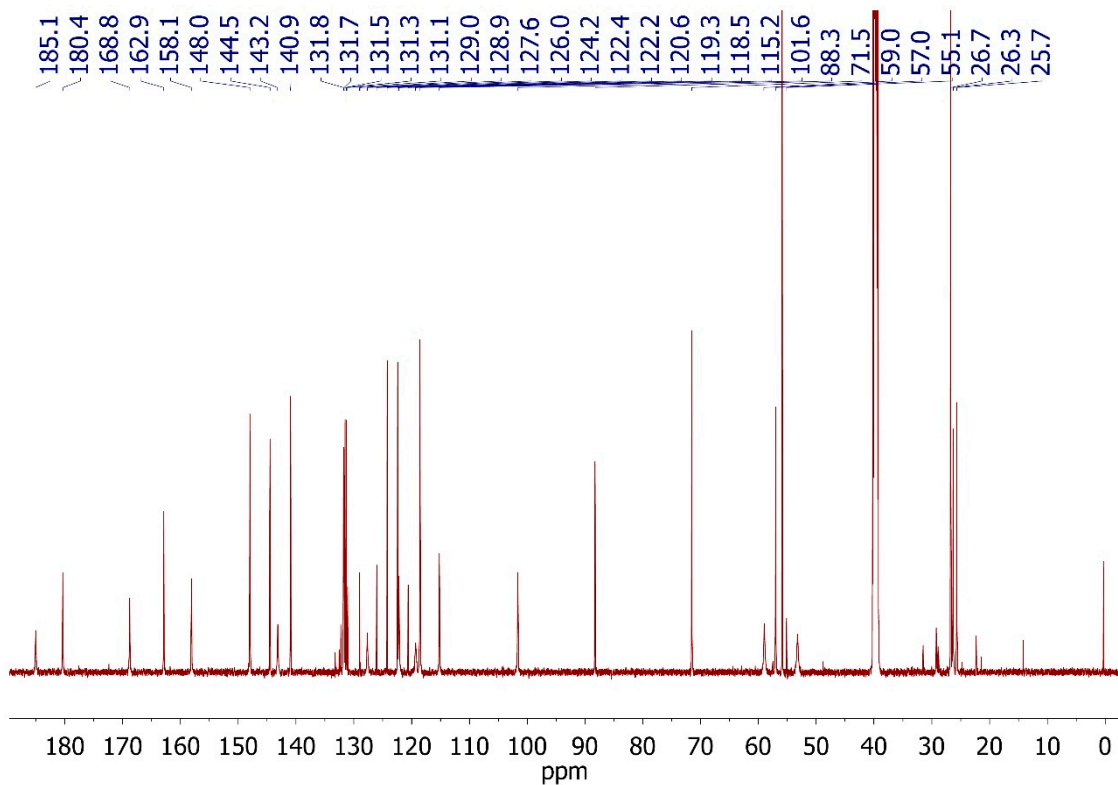

Figure S12a.  $^{13}\text{C}$  NMR Spectrum of DQ-SQ (150 MHz, DMSO, 25 °C).

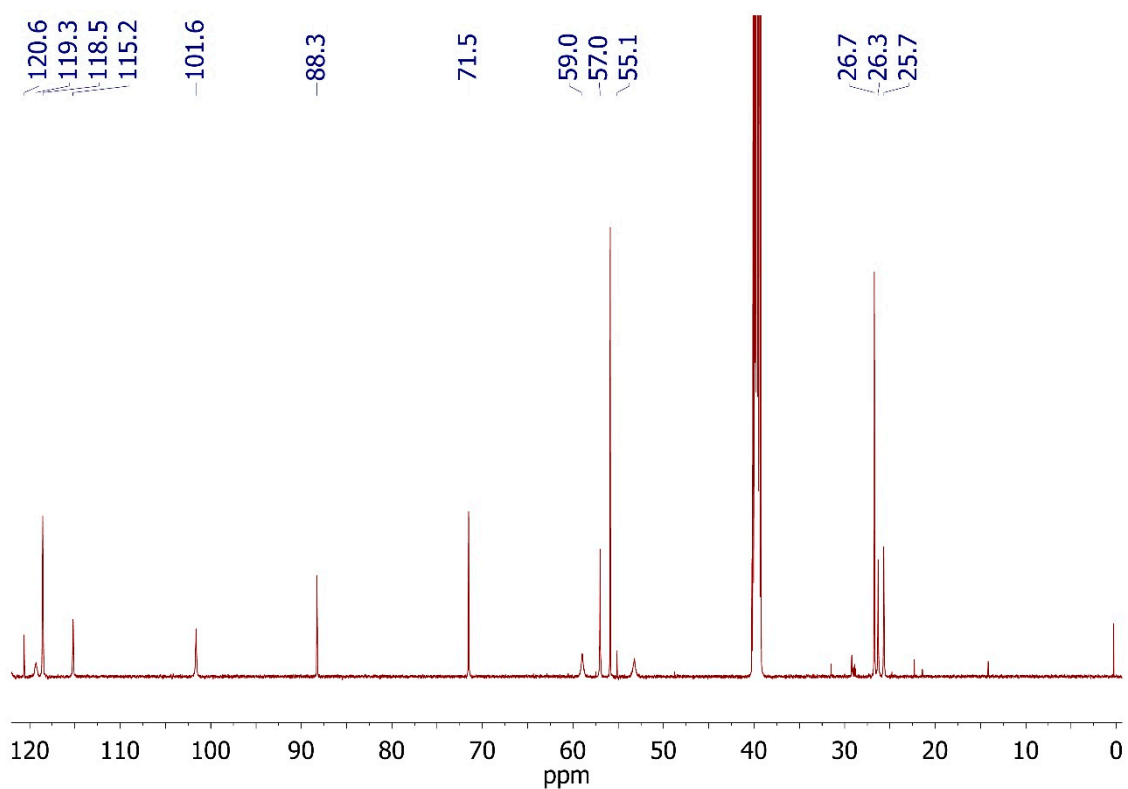

**Figure S12b.** <sup>13</sup>C NMR Spectrum of DQ-SQ in a range between 120.0 and 0.0 ppm (150 MHz, DMSO, 25 °C).

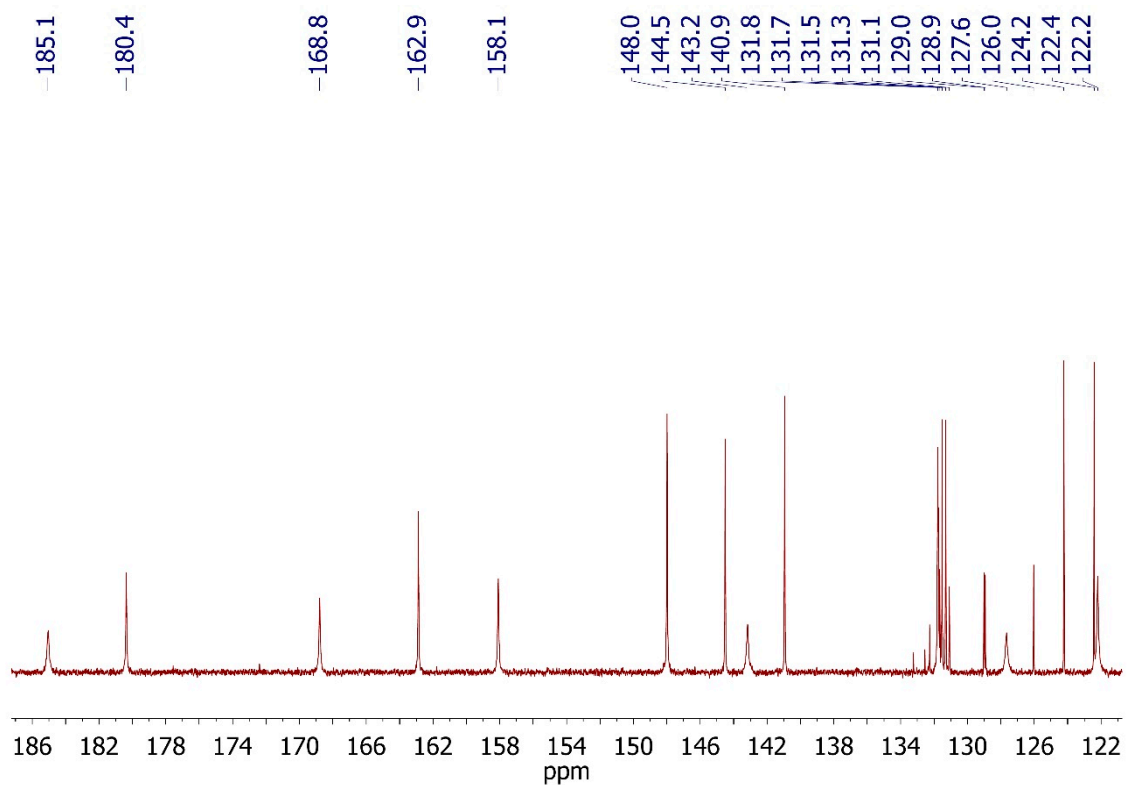

**Figure S12c.** <sup>13</sup>C NMR Spectrum of DQ-SQ in a range between 186.0 and 122.0 ppm (150 MHz, DMSO, 25 °C).

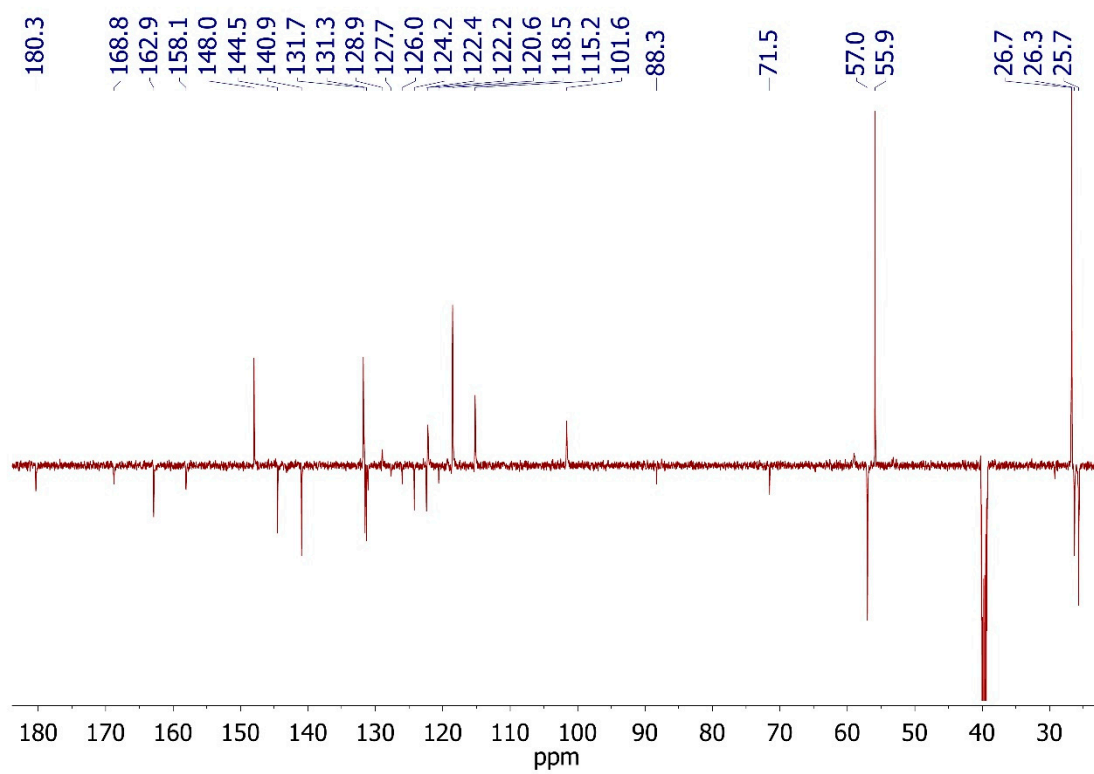

Figure S13.  $^{13}\text{C}$  DEPT NMR Spectrum of DQ-SQ (150 MHz, DMSO, 25 °C).

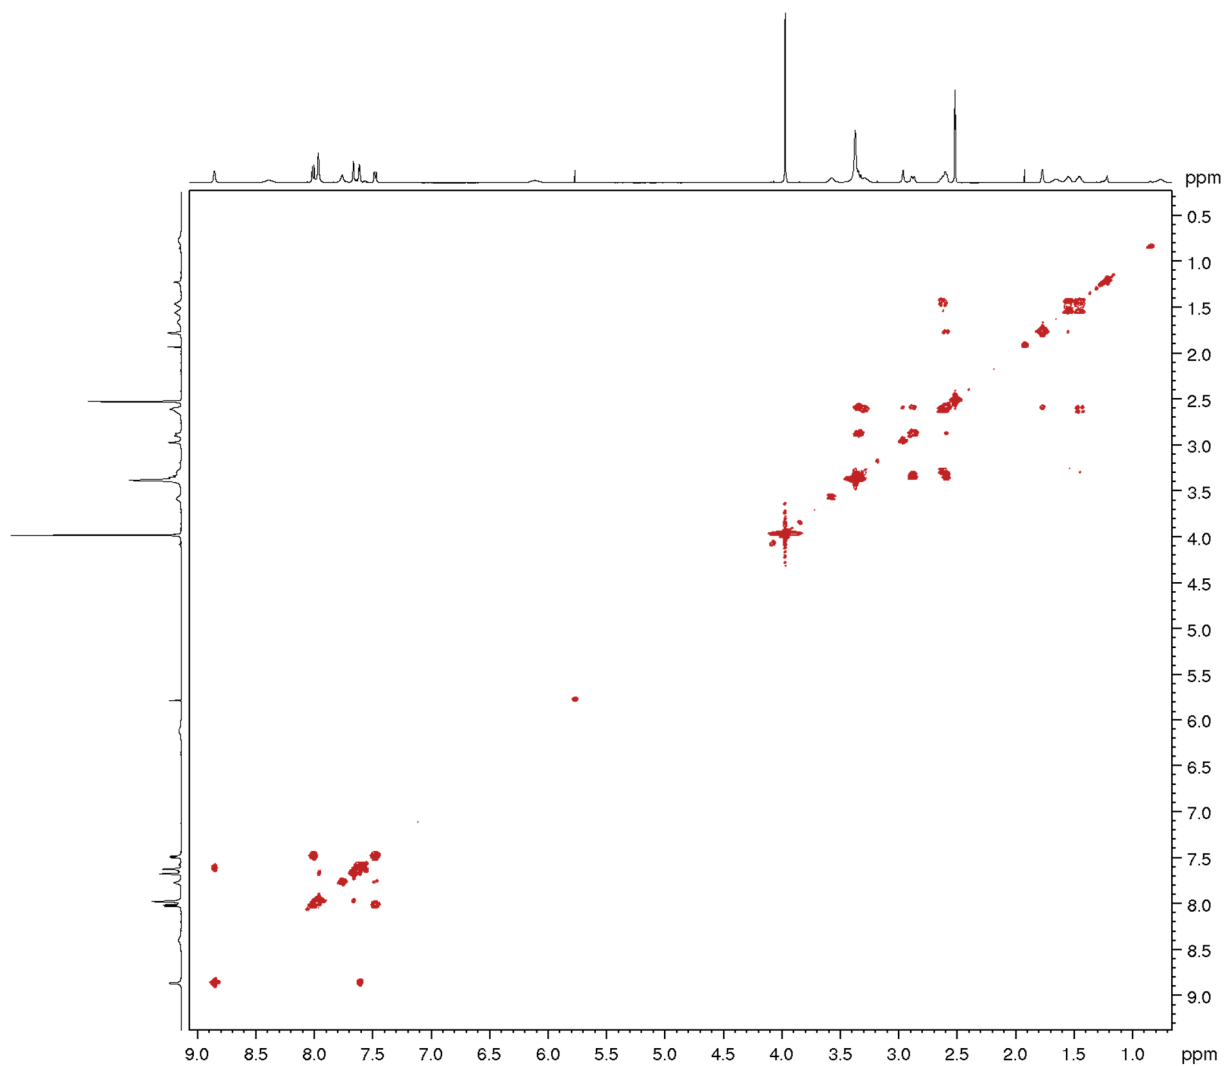

Figure S14. COSY NMR Spectrum of DQ-SQ (DMSO, 25 °C).

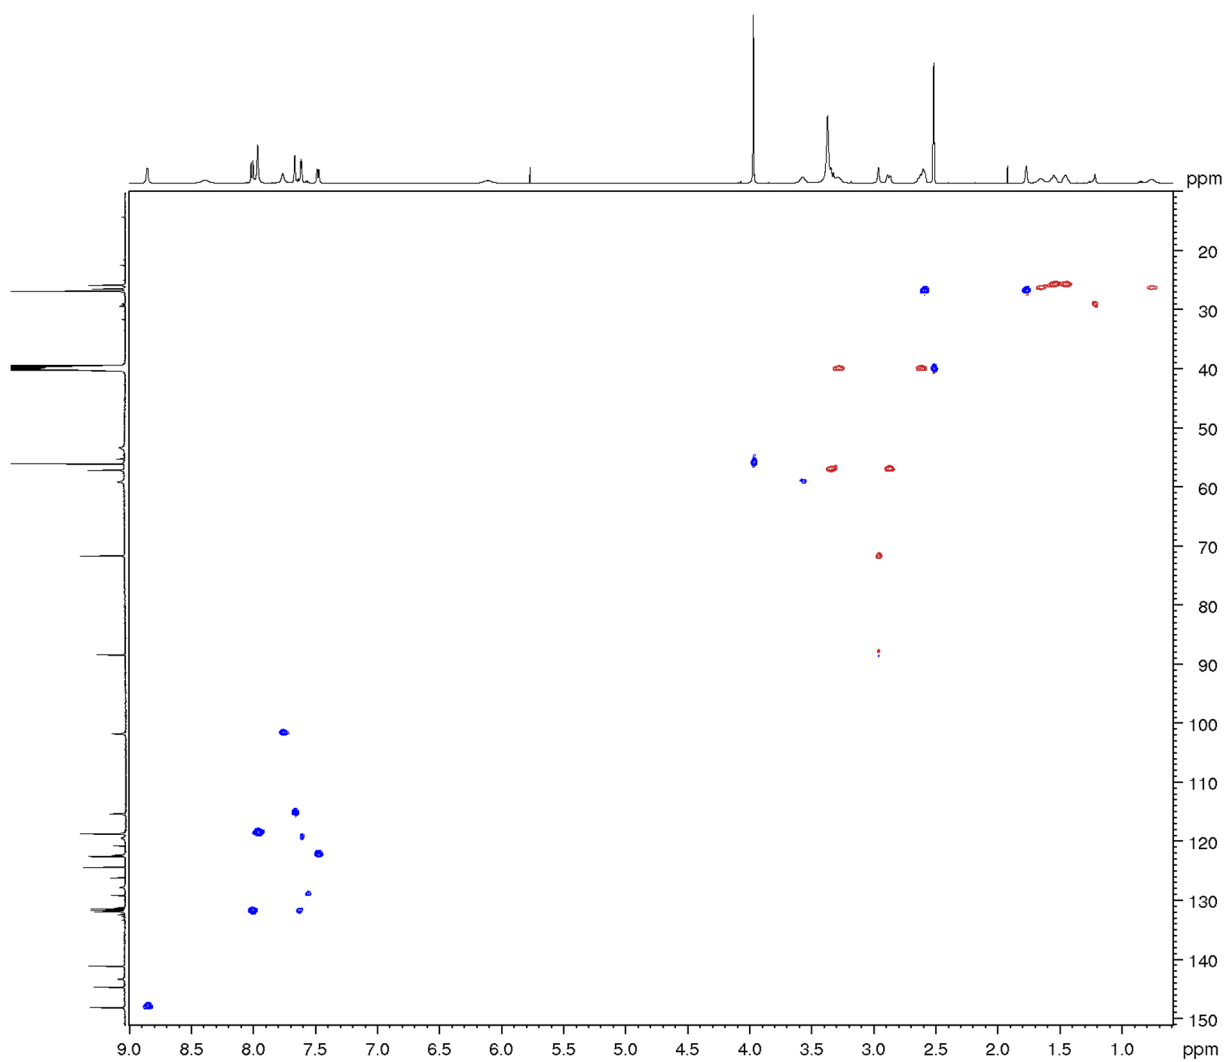

Figure S15. Edited HSQC NMR Spectrum of DQ-SQ (DMSO, 25 °C).

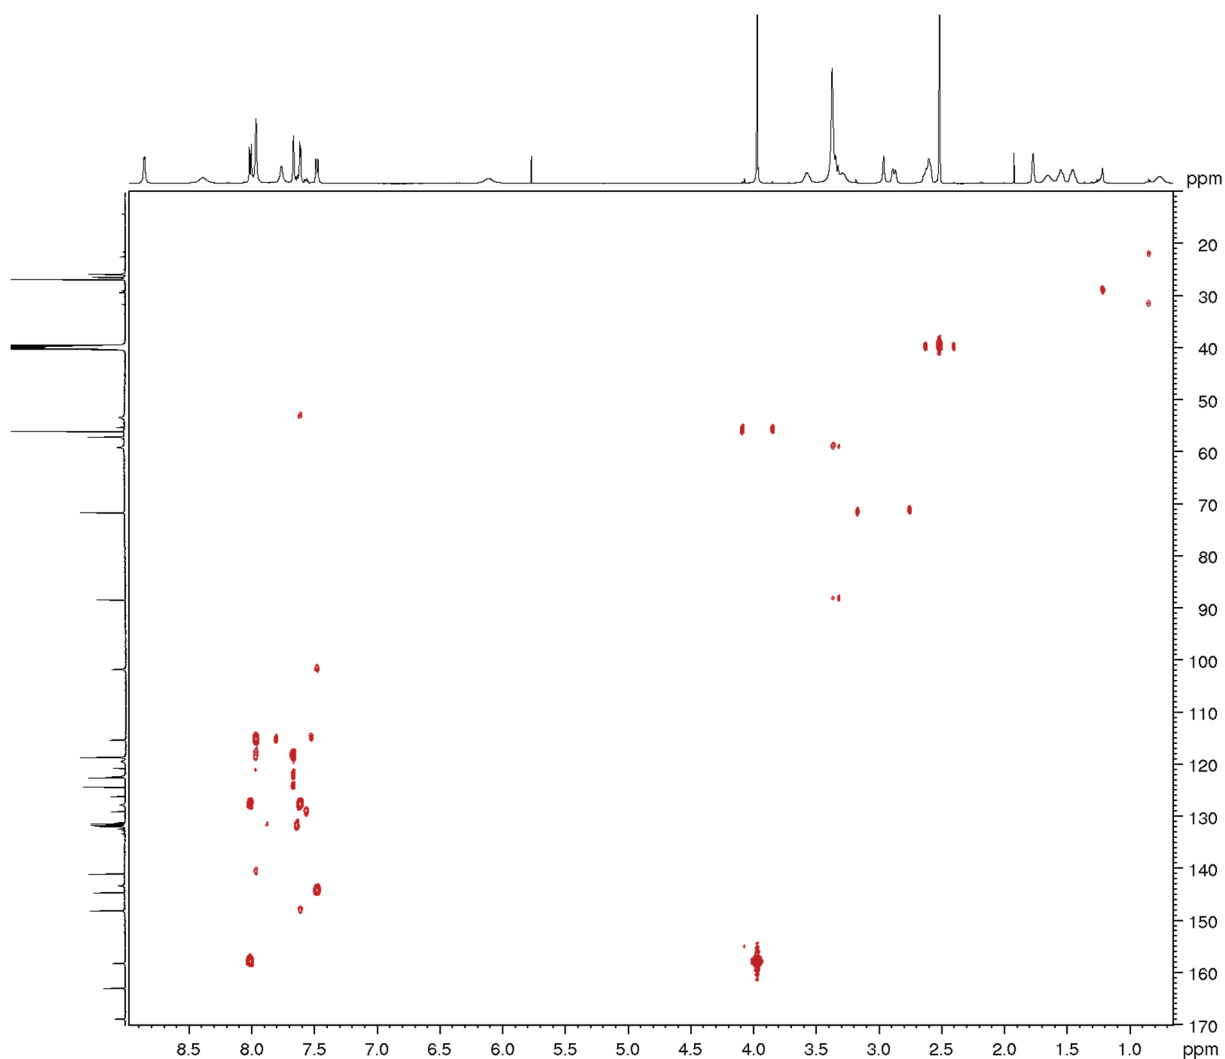

Figure S16. HMBC NMR Spectrum of DQ-SQ (DMSO, 25 °C).

#### 4. Chiral HPLC Profiles of Michael Adducts 3

HPLC: Phenomenex Lux Cellulose-3 column (3  $\mu\text{m}$ , 250  $\times$  4.6 mm), eluent  $\text{CH}_3\text{CN}/20 \text{ mM NH}_4\text{OAc}$  in  $\text{H}_2\text{O}$  = 40/60, isocratic mode; 0.6  $\text{mL}\cdot\text{min}^{-1}$ ; UV detector 222 nm, 5  $\mu\text{L}$  or 10  $\mu\text{L}$  injection, 20 °C. Retention time for (S)-3: 11.94 min, for (R)-3: 14.20 min.



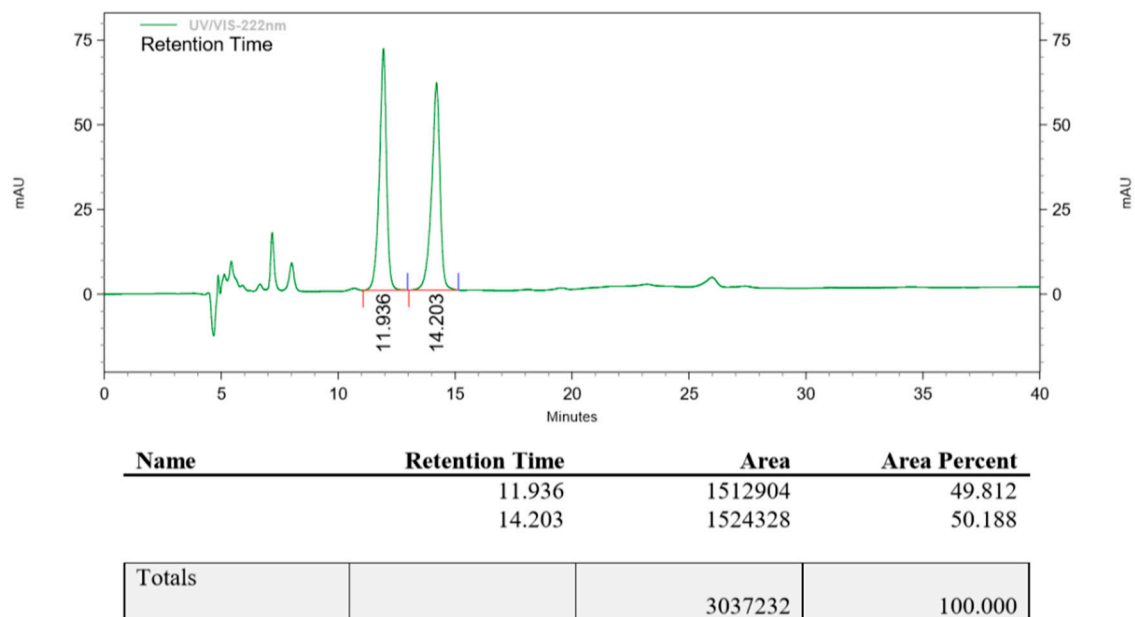

Figure S17. HPLC Chromatogram of racemic 3.

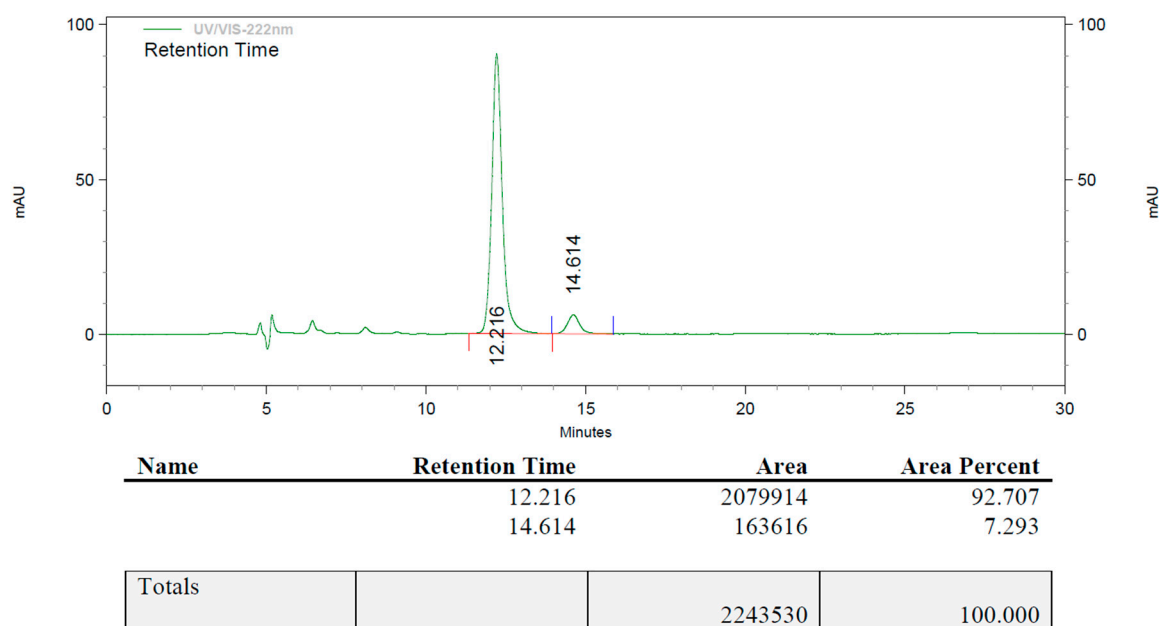

Figure S18. HPLC Chromatogram of enantiomeric enriched 3 (Table 3, Entry 1).

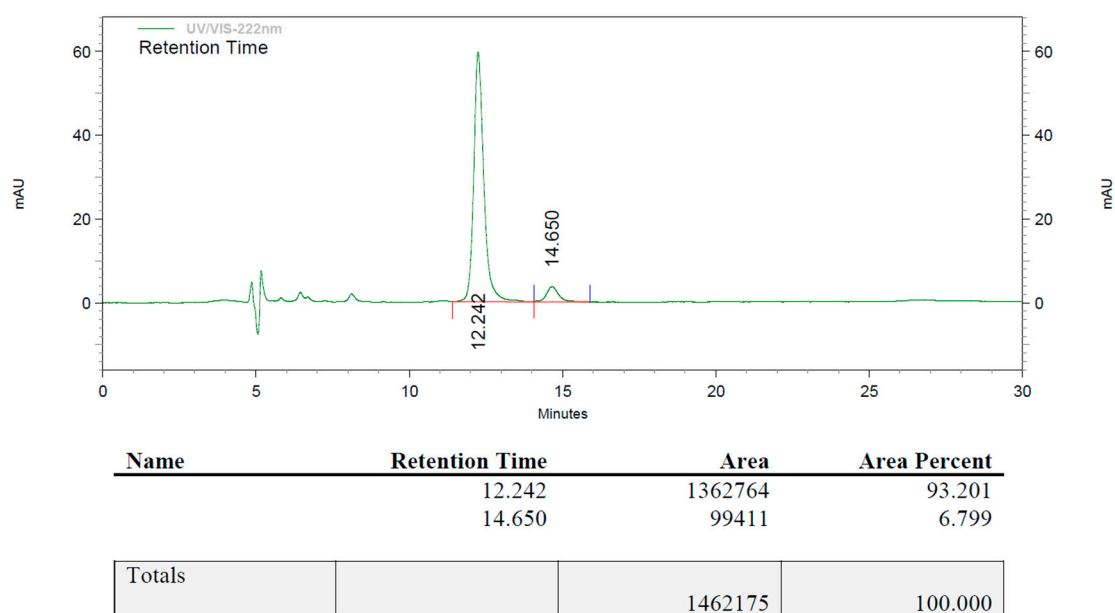

Figure S19. HPLC Chromatogram of enantiomeric enriched 3 (Table 3, Entry 26).

## 5. HRMS Spectra of New Compounds

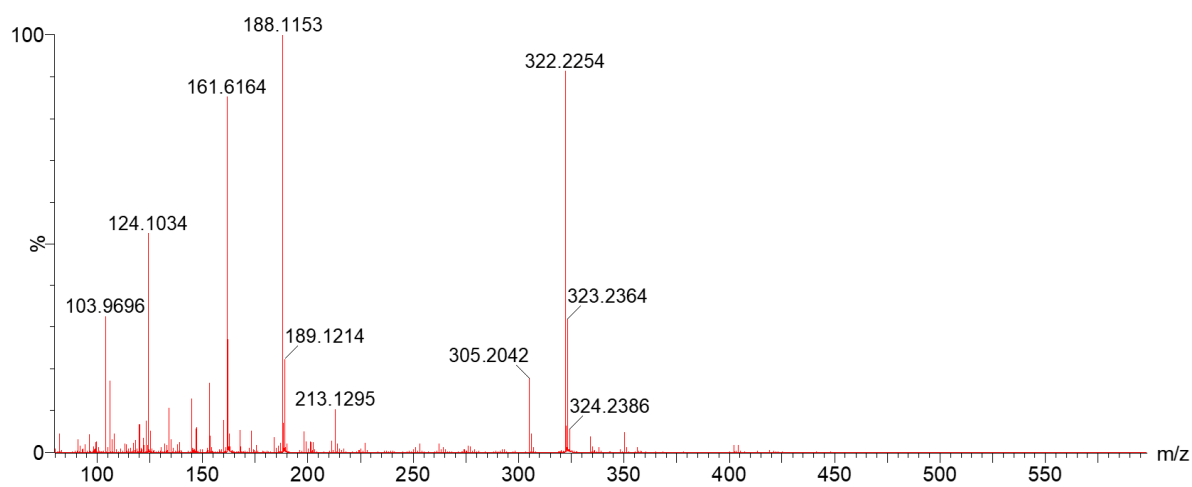

Figure S20. HRMS Spectrum of DQ-N.

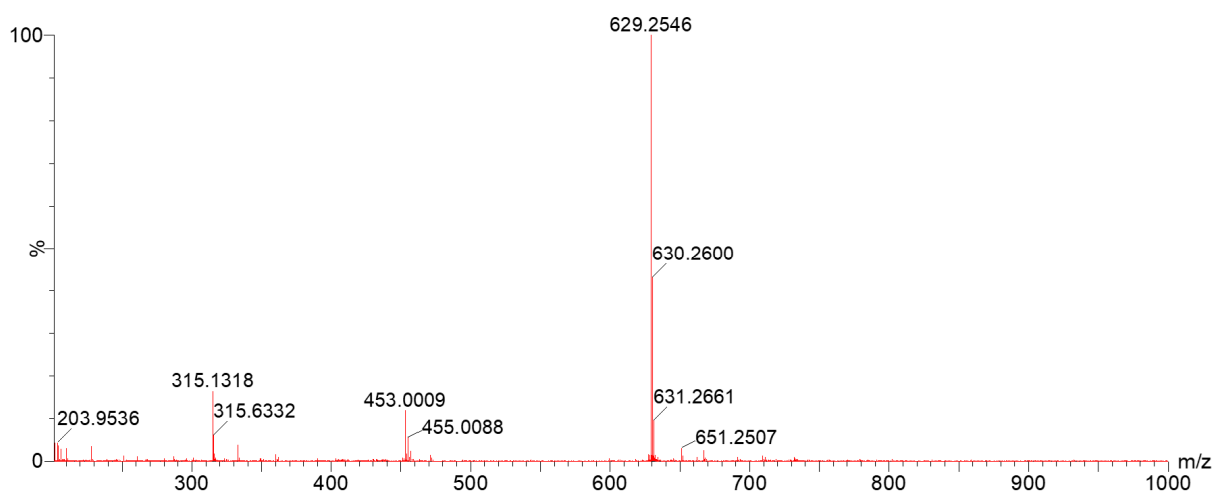

Figure S21. HRMS Spectrum of DQ-SQ.

## 6. Quantum Chemical Computations

**Table S6.** Relative free-energies ( $G_{rel}$ ) in THF solvent and relative energies ( $E_{rel}$ ) in the gas phase (both in  $\text{kJ}\cdot\text{mol}^{-1}$ ) compared to the lowest energy tautomers using two different solvent models (SMx and SS(V)PE) on three different level of theories ( $\omega\text{B97X-D}/6-31\text{G}^*$  and  $\omega\text{B97X-D}/6-31+\text{G}^{**}/\omega\text{B97X-D}/6-31\text{G}^*$  using SM8 and SS(V)PE and  $\omega\text{B97X-D}/6-311++\text{G}^{**}/\omega\text{B97X-D}/6-31\text{G}^*$  using SM12 solvent model).

|                           | $G_{rel}$ SM8 |          | $G_{rel}$ SM12 | $G_{rel}$ SS(V)PE |          | $E_{rel}$ gas |
|---------------------------|---------------|----------|----------------|-------------------|----------|---------------|
|                           | 6-31G*        | 6-31+G** | 6-311++G**     | 6-31G*            | 6-31+G** | 6-31+G**      |
| <b>Neutral</b>            |               |          |                |                   |          |               |
| HQ-TU_i                   | 0             | 0        | 0              | 0                 | 0        | 0             |
| HQ-TU_ii                  | 28            | 35       | 32             | 42                | 34       | 79            |
| HQ-TU_iii                 | 60            | 64       | 59             | 61                | 56       | 118           |
| HQ-TU_iv                  | 74            | 65       | 64             | 69                | 67       | 50            |
| HQ-TU_v                   | 88            | 76       | 79             | 85                | 85       | 68            |
| HQ-TU_vi                  | 88            | 79       | 87             | 100               | 90       | 161           |
| HQ-TU_vii                 | 110           | 90       | 94             | 101               | 90       | 96            |
| HQ-TU_viii                | 125           | 133      | 129            | 134               | 132      | 204           |
| HQ-TU_ix                  | 137           | 136      | 146            | 122               | 130      | 129           |
| HQ-TU_x                   | 188           | 194      | 187            | 181               | 191      | 178           |
| Q-TU_i                    | 0             | 0        | 0              | 0                 | 0        | 0             |
| Q-TU_ii                   | 27            | 34       | 32             | 41                | 34       | 78            |
| Q-TU_iii                  | 64            | 66       | 63             | 66                | 61       | 123           |
| Q-TU_iv                   | 75            | 70       | 65             | 70                | 67       | 52            |
| DQ-TU_i                   | 0             | 0        | 0              | 0                 | 0        | 0             |
| DQ-TU_ii                  | 32            | 42       | 40             | 49                | 42       | 86            |
| DQ-TU_iii                 | 68            | 66       | 66             | 69                | 67       | 120           |
| DQ-TU_iv                  | 74            | 69       | 70             | 72                | 68       | 53            |
| <b>Deprotonated anion</b> |               |          |                |                   |          |               |
| HQ-TU_anion_1             | 0             | 0        | 0              | 0                 | 0        | 0             |
| HQ-TU_anion_2             | 12            | 16       | 9              | 4                 | 3        | 26            |
| Q-TU_anion_1              | 0             | 0        | 0              | 0                 | 0        | 0             |
| Q-TU_anion_2              | 14            | 18       | 10             | 7                 | 9        | 28            |
| DQ-TU_anion_1             | 0             | 0        | 0              | 0                 | 0        | 0             |
| DQ-TU_anion_2             | 13            | 19       | 12             | 7                 | 5        | 29            |
| <b>Protonated cation</b>  |               |          |                |                   |          |               |
| HQ-TU_cation_1            | 0             | 0        | 0              | 0                 | 0        | 0             |
| HQ-TU_cation_2            | 78            | 65       | 62             | 67                | 58       | 50            |
| Q-TU_cation_1             | 0             | 0        | 0              | 0                 | 0        | 0             |

|                |    |    |    |    |    |    |
|----------------|----|----|----|----|----|----|
| Q-TU_cation_2  | 83 | 71 | 69 | 69 | 59 | 51 |
| DQ-TU_cation_1 | 0  | 0  | 0  | 0  | 0  | 0  |
| DQ-TU_cation_2 | 71 | 66 | 64 | 77 | 69 | 50 |

**Table S7.** Protonation and deprotonation free energies ( $\Delta G$ ) in THF solvent and energies in the gas phase ( $\Delta E$ ) (in  $\text{kJ}\cdot\text{mol}^{-1}$ ) using two different solvent models (SMx and SS(V)PE) on three different level of theories ( $\omega\text{B97X-D}/6-31\text{G}^*$  and  $\omega\text{B97X-D}/6-31+\text{G}^{**}$ //  $\omega\text{B97X-D}/6-31\text{G}^*$  using SM8 and SS(V)PE and  $\omega\text{B97X-D}/6-311++\text{G}^{**}$ //  $\omega\text{B97X-D}/6-31\text{G}^*$  using SM12 solvent model).

|                           | $\Delta G$ SM8 |          | $\Delta G$ SM12 | $\Delta G$ SS(V)PE |          | $\Delta E$ gas |
|---------------------------|----------------|----------|-----------------|--------------------|----------|----------------|
|                           | 6-31G*         | 6-31+G** | 6-311++G**      | 6-31G*             | 6-31+G** | 6-31+G**       |
| <b>Deprotonated anion</b> |                |          |                 |                    |          |                |
| HQ-TU_anion_1             | 156            | 132      | 150             | 195                | 178      | 1406           |
| HQ-TU_anion_2             | 168            | 148      | 159             | 199                | 181      | 1432           |
| Q-TU_anion_1              | 155            | 128      | 148             | 192                | 177      | 1402           |
| Q-TU_anion_2              | 168            | 146      | 157             | 198                | 181      | 1430           |
| DQ-TU_anion_1             | 154            | 125      | 144             | 189                | 172      | 1398           |
| DQ-TU_anion_2             | 167            | 145      | 157             | 197                | 178      | 1427           |
| <b>Protonated cation</b>  |                |          |                 |                    |          |                |
| HQ-TU_cation_1            | -74            | -41      | -44             | -38                | -32      | -1029          |
| HQ-TU_cation_2            | -24            | -11      | -14             | -13                | -8       | -1057          |
| Q-TU_cation_1             | -77            | -42      | -46             | -37                | -29      | -1023          |
| Q-TU_cation_2             | -20            | -5       | -9              | -9                 | -4       | -1050          |
| DQ-TU_cation_1            | -59            | -36      | -40             | -36                | -29      | -961           |
| DQ-TU_cation_2            | -21            | -6       | -9              | -8                 | -2       | -950           |
| <b>THF</b>                |                |          |                 |                    |          |                |
| Monomer THF-H             | -1078          | -1079    | -1078           | -1059              | -1059    |                |
| Dimer THF-H               | -1162          | -1163    | -1158           | -1131              | -1131    |                |
| Dimer H-THF               | -1162          | -1163    | -1158           | -1130              | -1130    |                |
| Dimer THF-2H              | -1069          | -1072    | -1067           | -1028              | -1030    |                |

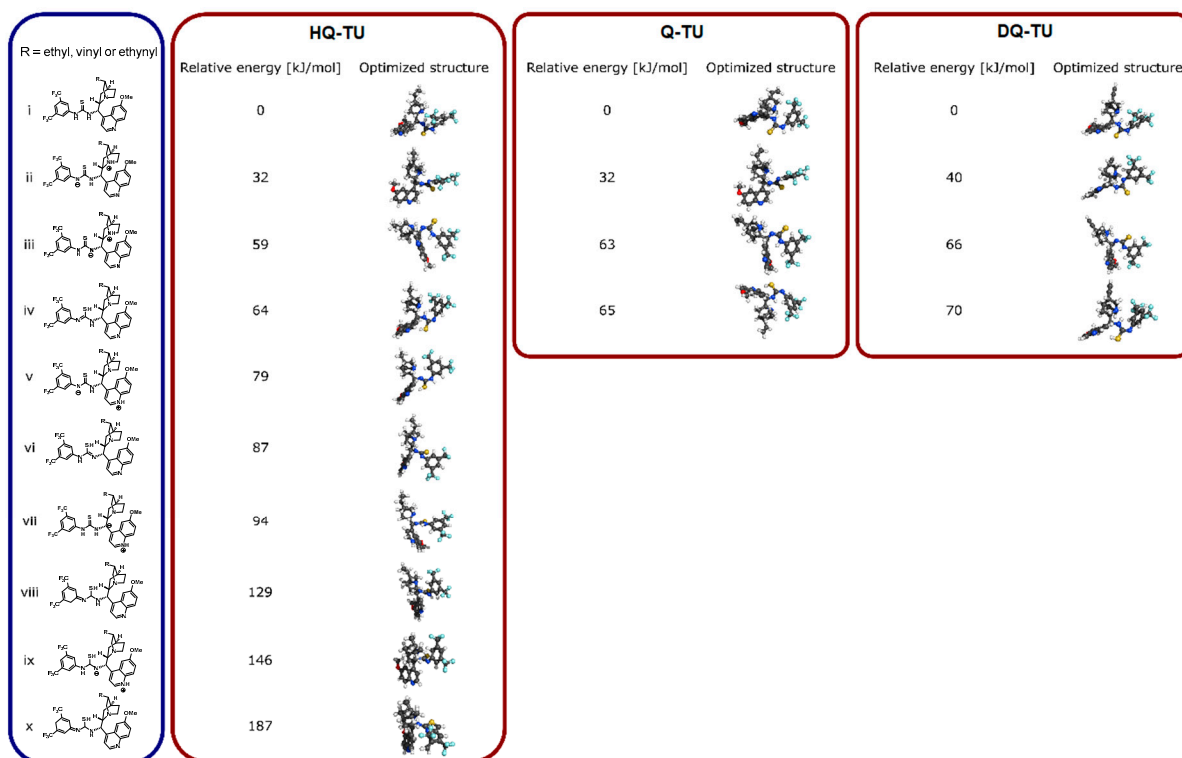

**Figure S22.** Geometric structures of the studied tautomers and their relative Gibbs free energies in THF, computed using the  $\omega$ B97X-D/6-311++G\*\*+SM12 method (for higher resolution see below: Figure S22a-c).

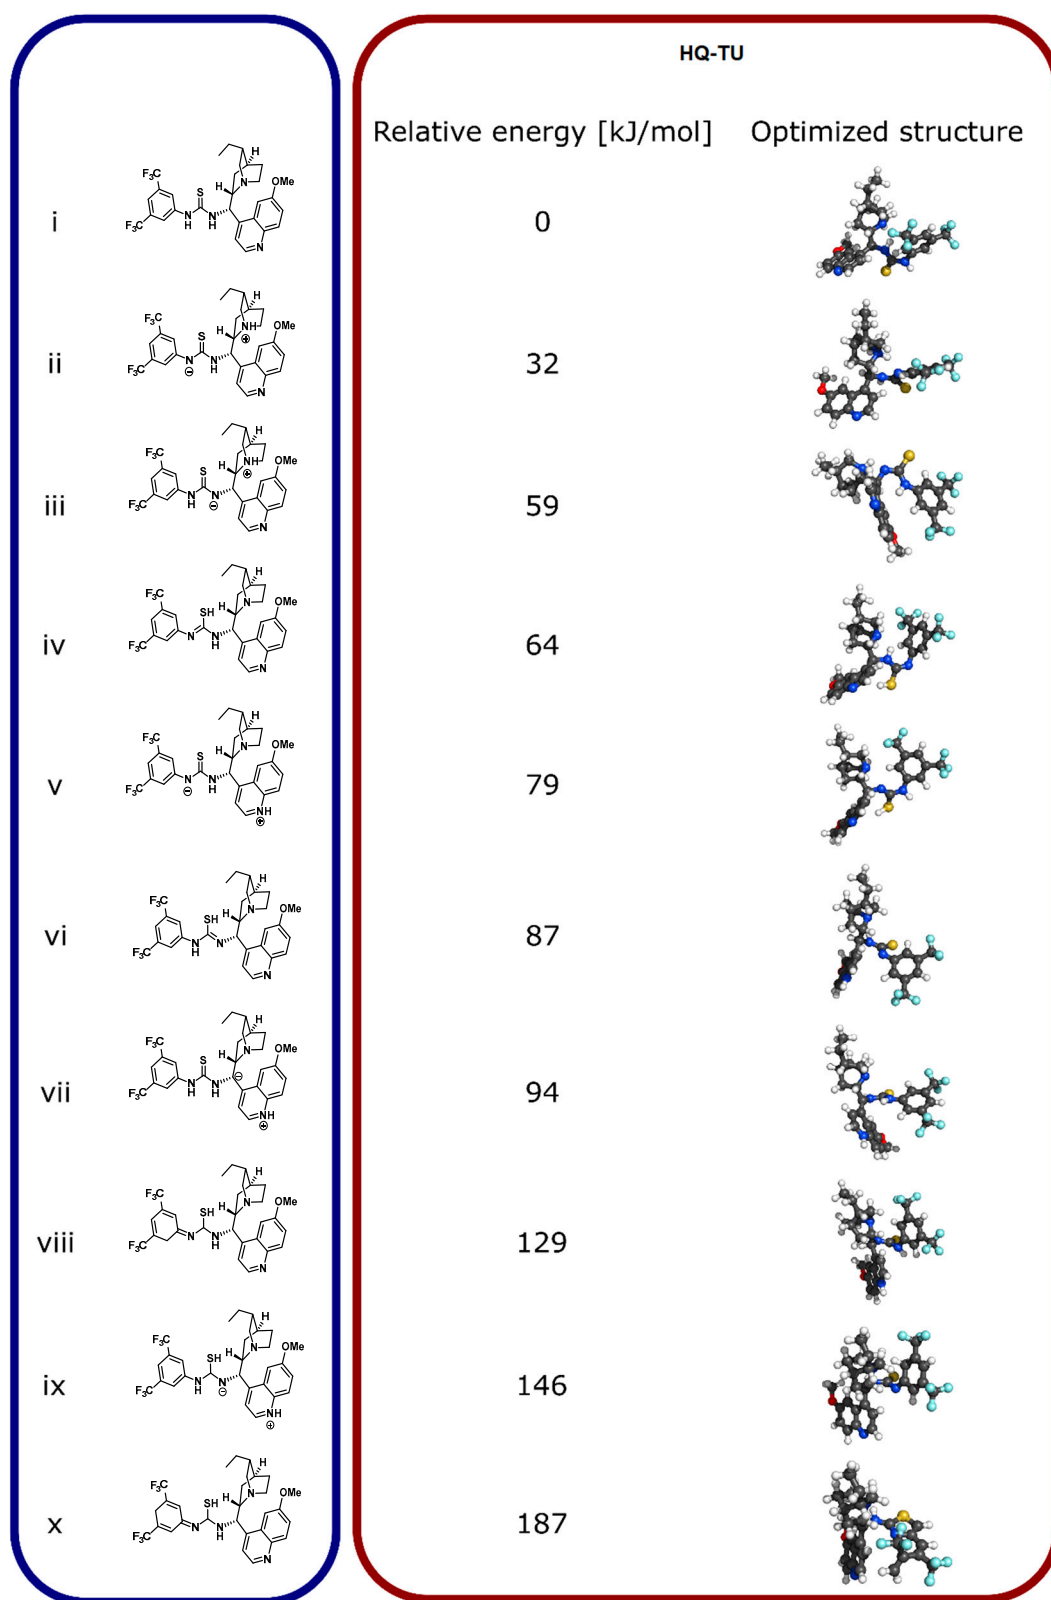

**Figure S22a.** Geometric structures of the studied tautomers of HQ-TU and their relative Gibbs free energies in THF, computed using the  $\omega$ B97X-D/6-311++G\*\*+SM12(THF)// $\omega$ B97X-D/6-31G\*\*+SM8(THF) method.

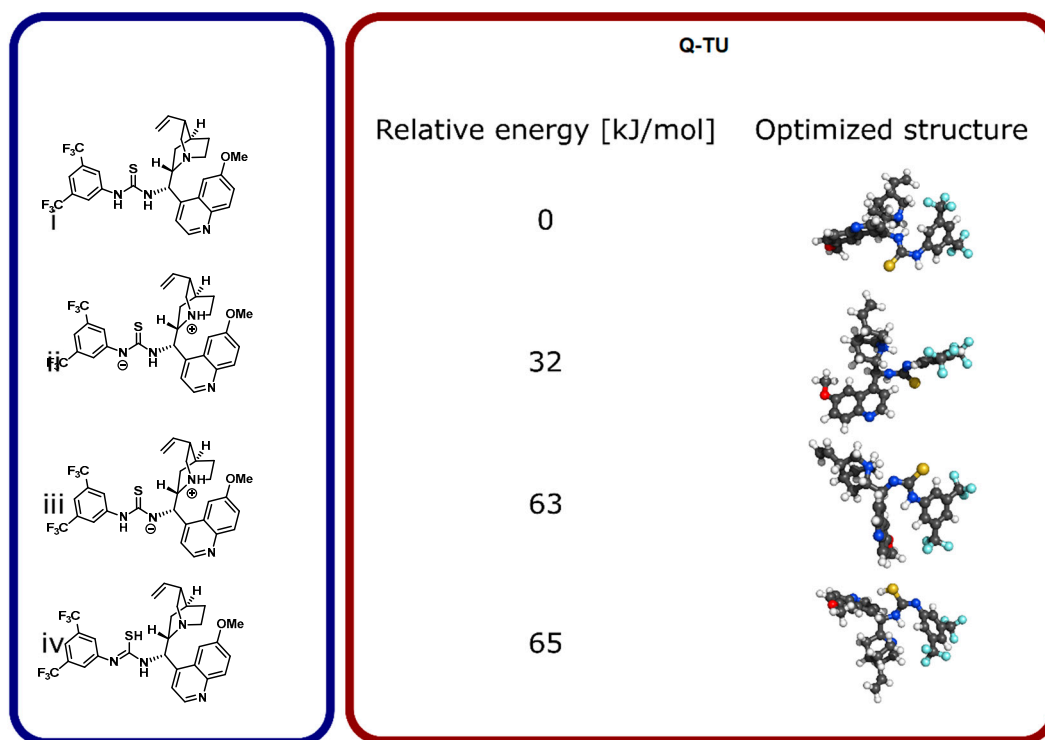

**Figure s22b.** Geometric structures of the studied tautomers of Q-TU and their relative Gibbs free energies in THF, computed using the  $\omega$ B97X-D/6-311++G\*\*+SM12(THF)// $\omega$ B97X-D/6-31G\*\*+SM8(THF) method.

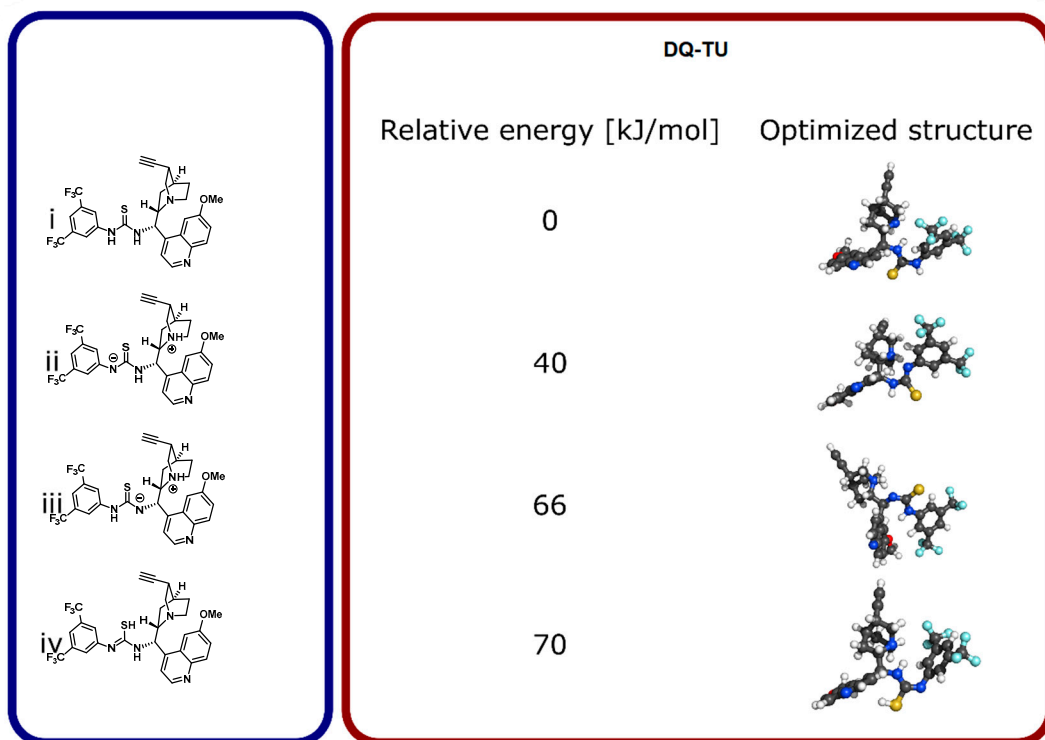

**Figure S22c.** Geometric structures of the studied tautomers of DQ-TU and their relative Gibbs free energies in THF, computed using the  $\omega$ B97X-D/6-311++G\*\*+SM12(THF)// $\omega$ B97X-D/6-31G\*\*+SM8(THF) method.

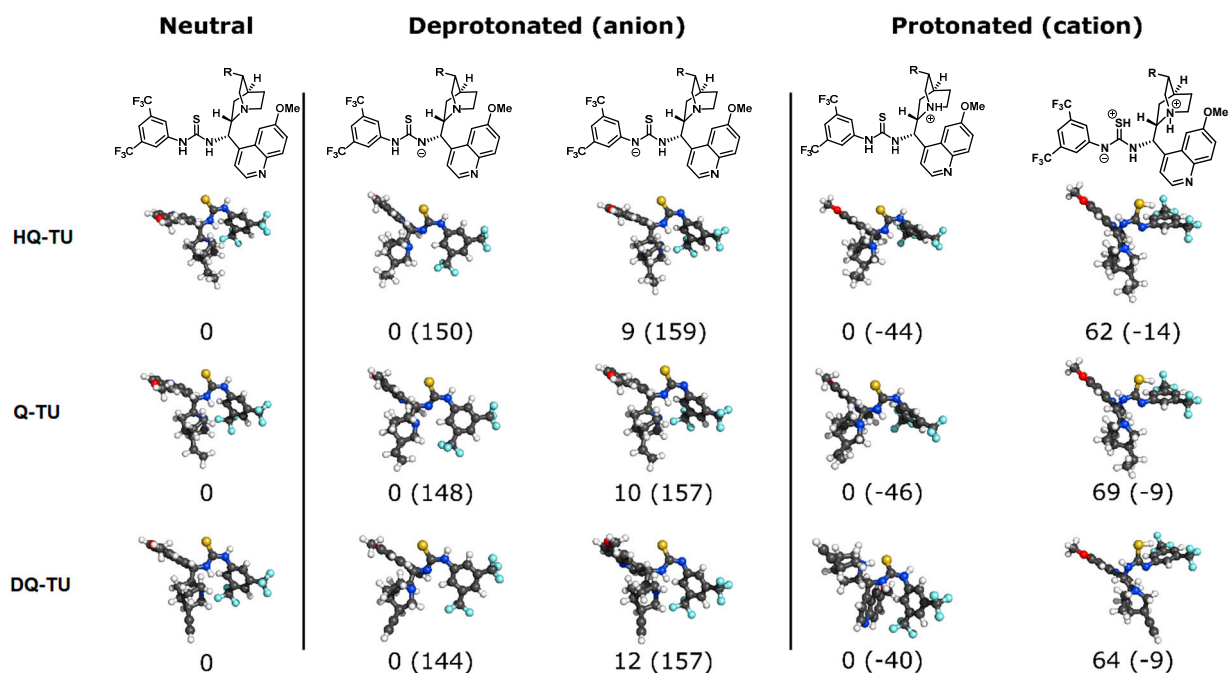

**Figure s23.** Geometric structures of the neutral, deprotonated and protonated form of *i* and their relative Gibbs free energies in THF. Protonation and deprotonation Gibbs free energies of the corresponding neutral tautomer are indicated in parenthesis. ( $\omega$ B97X-D/6-311++G\*\*+SM12(THF)// $\omega$ B97X-D/6-31G\*+SM8(THF) method).

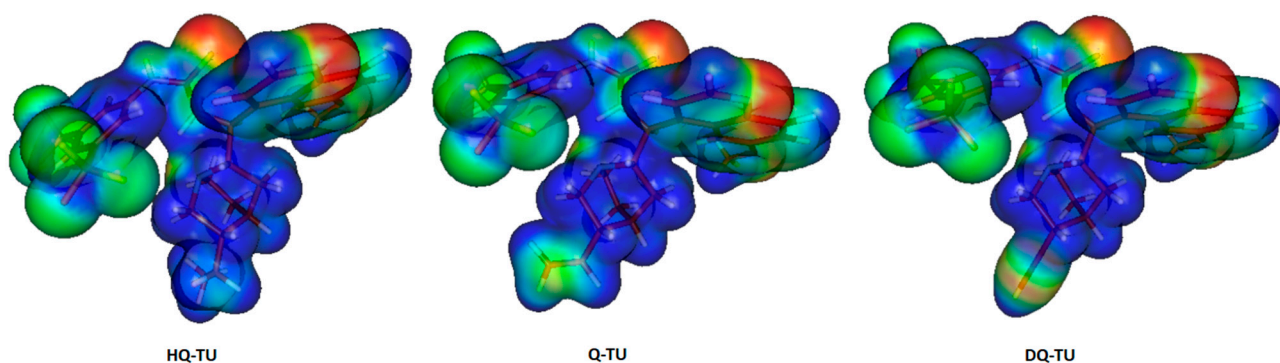

**Figure s24.** Electrostatic potentials (ESP) mapped onto the 0.01 a.u. electron density isosurface of HQ-TU, Q-TU and DQ-TU. Colors: ESP < -0.05 a.u. – red, ESP = -0.02 a.u. – yellow, ESP = 0.0 a.u. – green, ESP = 0.02 a.u. – light blue, ESP > 0.05 a.u. blue.

**Table S8a.** Total energies in Hartree and optimized coordinates of the different neutral, protonated and deprotonated HQ-TU, Q-TU and DQ-TU tautomers. ( $\omega$ B97X-D/6-31G\* +SM8(THF) level of theory).

| HQ-TU <sub>i</sub>    |   |               |              |               |
|-----------------------|---|---------------|--------------|---------------|
| E = -2414.09342337501 |   |               |              |               |
| 1                     | C | -8.7444564215 | 3.1770499741 | -2.7908482866 |
| 2                     | O | -9.2837799595 | 2.3728726280 | -1.7546787932 |
| 3                     | C | -9.0796747534 | 1.2692310323 | 0.2960376298  |
| 4                     | C | -7.1618716773 | 2.4545667292 | -0.5948919635 |
| 5                     | C | -6.3933723983 | 2.0757456347 | 0.5401771850  |
| 6                     | C | -8.3591627578 | 0.8836464631 | 1.3868054472  |
| 7                     | C | -6.9994136245 | 1.2690466449 | 1.5431715495  |



---

|    |   |                |               |               |
|----|---|----------------|---------------|---------------|
| 8  | C | -5.0326876157  | 2.4549357953  | 0.7413317708  |
| 9  | C | -4.4022855729  | 2.0059696556  | 1.8769897698  |
| 10 | C | -5.0920777244  | 1.2006355988  | 2.8003481001  |
| 11 | N | -6.3485242623  | 0.8374733486  | 2.6588865347  |
| 12 | C | -4.2978863978  | 3.4035368124  | -0.1900331641 |
| 13 | C | -4.2645557980  | 4.8197653246  | 0.4448364776  |
| 14 | C | -5.6360188728  | 5.5367036797  | 0.4878915909  |
| 15 | C | -5.3740569479  | 7.0274759556  | 0.2001747762  |
| 16 | C | -4.2383561448  | 7.4821518018  | 1.1489204412  |
| 17 | C | -2.9389792770  | 6.7941565013  | 0.6541757471  |
| 18 | C | -4.0847474527  | 8.9903628153  | 1.3985665593  |
| 19 | C | -3.8887693695  | 9.9037804877  | 0.1887537871  |
| 20 | N | -3.2501608509  | 5.6556592599  | -0.2205555501 |
| 21 | N | -2.9044866749  | 3.0515207725  | -0.3861964882 |
| 22 | C | -2.4373220030  | 2.0296908034  | -1.1192347440 |
| 23 | N | -1.0793728948  | 2.0141383577  | -1.2934263989 |
| 24 | C | -0.1460769185  | 2.9616669989  | -0.8197189804 |
| 25 | C | -0.1437984935  | 3.3802484746  | 0.5132054814  |
| 26 | C | 0.7661931161   | 4.3401340550  | 0.9353805586  |
| 27 | C | 1.7163241439   | 4.8593193004  | 0.0631136841  |
| 28 | C | 0.8050822766   | 3.4759571617  | -1.6997877522 |
| 29 | C | 1.7354119767   | 4.4072828063  | -1.2498478773 |
| 30 | C | 0.7431276875   | 4.7682179767  | 2.3782509739  |
| 31 | C | 2.7560284441   | 4.9278105558  | -2.2262349129 |
| 32 | F | 1.4039727697   | 5.9196886323  | 2.5745210328  |
| 33 | F | 1.3067311652   | 3.8429329996  | 3.1762235657  |
| 34 | F | -0.5147293542  | 4.9449686823  | 2.8223846884  |
| 35 | F | 3.5937643366   | 3.9526624625  | -2.6227410437 |
| 36 | F | 3.5053986728   | 5.9110210300  | -1.7027689567 |
| 37 | F | 2.1731755878   | 5.4129060650  | -3.3358983313 |
| 38 | S | -3.4036043985  | 0.8185394520  | -1.8026838659 |
| 39 | H | -8.4282101374  | 4.1559896596  | -2.4113259272 |
| 40 | H | -9.5500314046  | 3.3172443953  | -3.5119771598 |
| 41 | H | -7.9013214005  | 2.6805198022  | -3.2856225463 |
| 42 | C | -8.4737087763  | 2.0626308880  | -0.7146413831 |
| 43 | H | -10.1174079505 | 0.9790063126  | 0.1707189995  |
| 44 | H | -8.7985888250  | 0.2724650105  | 2.1681464520  |
| 45 | H | -6.6996532623  | 3.0377692470  | -1.3785028736 |
| 46 | H | -4.5837893912  | 0.8476021060  | 3.6951578694  |
| 47 | H | -3.3660473985  | 2.2663217289  | 2.0678144228  |
| 48 | H | -4.7950981170  | 9.9744159866  | -0.4209058362 |
| 49 | H | -3.0698277308  | 9.5727816794  | -0.4603890282 |
| 50 | H | -3.6453119424  | 10.9190887468 | 0.5193064266  |
| 51 | H | -3.2326452080  | 9.1225541808  | 2.0794430850  |
| 52 | H | -4.9648655928  | 9.3372703857  | 1.9550210199  |
| 53 | C | -4.9602986112  | 7.1202088962  | -1.2797591853 |
| 54 | C | -3.7607729445  | 6.1630393691  | -1.5017853796 |
| 55 | H | -4.4784591589  | 7.0568228903  | 2.1336118123  |
| 56 | H | -2.3139132527  | 7.4865048395  | 0.0784380554  |
| 57 | H | -2.3328797769  | 6.4391067240  | 1.4937846554  |
| 58 | H | -6.2808120284  | 7.6146742021  | 0.3818102421  |
| 59 | H | -4.6959219601  | 8.1420660838  | -1.5575318543 |

---

|    |   |               |              |               |
|----|---|---------------|--------------|---------------|
| 60 | H | -5.8081291174 | 6.8322313241 | -1.9114014138 |
| 61 | H | -2.9355063849 | 6.6668535831 | -2.0137016995 |
| 62 | H | -4.0374162451 | 5.3067538464 | -2.1250530478 |
| 63 | H | -6.3228657701 | 5.1289417732 | -0.2627395776 |
| 64 | H | -6.1112251504 | 5.3912483851 | 1.4627866342  |
| 65 | H | -3.8981749310 | 4.6803109897 | 1.4694162548  |
| 66 | H | -4.7967999523 | 3.4319599939 | -1.1637764115 |
| 67 | H | -2.3366347074 | 3.9048100874 | -0.3346648979 |
| 68 | H | -0.7430711081 | 1.3422100417 | -1.9725613763 |
| 69 | H | -0.8582172711 | 2.9627255351 | 1.2124910416  |
| 70 | H | 0.8026170389  | 3.1590553994 | -2.7379984107 |
| 71 | H | 2.4251969082  | 5.6048731768 | 0.3990707954  |

---

**HQ-TU\_ii**


---

$$E = -2414.08284281588$$


---

|    |   |               |               |               |
|----|---|---------------|---------------|---------------|
| 1  | C | -6.6869281877 | 1.6305948211  | 1.8965226655  |
| 2  | O | -6.8091197761 | 2.4543796116  | 0.7474237074  |
| 3  | C | -5.9259955170 | 3.3810039171  | -1.2082245915 |
| 4  | C | -4.5108996635 | 1.9722696460  | 0.1666282123  |
| 5  | C | -3.4345339960 | 2.1466111440  | -0.7484645599 |
| 6  | C | -4.9091999578 | 3.5690256308  | -2.0955600739 |
| 7  | C | -3.6391352613 | 2.9599694621  | -1.8984865136 |
| 8  | C | -2.1488723754 | 1.5438970169  | -0.5942721708 |
| 9  | C | -1.2024734170 | 1.7882736537  | -1.5635603425 |
| 10 | C | -1.5104574838 | 2.6152011723  | -2.6583039573 |
| 11 | N | -2.6799638094 | 3.1906476309  | -2.8373597583 |
| 12 | C | -1.7968186159 | 0.6426242938  | 0.5891769328  |
| 13 | C | -1.6635065131 | -0.8038239191 | 0.0704756755  |
| 14 | C | -3.0331709622 | -1.4596911257 | -0.2208086023 |
| 15 | C | -3.0227309098 | -2.8881755698 | 0.3483695273  |
| 16 | C | -1.7841804045 | -3.5943354512 | -0.2470583530 |
| 17 | C | -0.5398053136 | -2.9630467093 | 0.4042352968  |
| 18 | C | -1.7541761847 | -5.1309927401 | -0.2145161445 |
| 19 | C | -1.9259807722 | -5.8223664157 | 1.1377942696  |
| 20 | N | -0.9252400970 | -1.6672496560 | 1.0501089340  |
| 21 | N | -0.6935359117 | 1.1535145108  | 1.4159504488  |
| 22 | C | 0.6651606471  | 1.1835198679  | 1.1202759995  |
| 23 | N | 1.0761229174  | 0.1610111431  | 0.4012776649  |
| 24 | C | 2.3904535908  | -0.1144190048 | 0.0626787773  |
| 25 | C | 2.6190429293  | -0.6784871916 | -1.1992608944 |
| 26 | C | 3.8880758178  | -1.0925831617 | -1.5894195834 |
| 27 | C | 4.9706873759  | -0.9707909163 | -0.7303812989 |
| 28 | C | 3.4917013325  | 0.0060569498  | 0.9289487623  |
| 29 | C | 4.7510340679  | -0.4210689927 | 0.5305770926  |
| 30 | C | 4.0556675886  | -1.6834676940 | -2.9607211174 |
| 31 | C | 5.9180775519  | -0.2468207869 | 1.4619583228  |
| 32 | F | 5.3145145962  | -2.0954419995 | -3.1928032034 |
| 33 | F | 3.7462274559  | -0.7949927251 | -3.9259197552 |
| 34 | F | 3.2507866175  | -2.7437057775 | -3.1487174019 |
| 35 | F | 6.5508911321  | 0.9269239895  | 1.2590953274  |
| 36 | F | 6.8412015749  | -1.2123242712 | 1.2951216160  |
| 37 | F | 5.5480155078  | -0.2705477601 | 2.7529333067  |
| 38 | S | 1.5583353483  | 2.5218350254  | 1.7623662894  |

---

|                       |   |               |               |               |
|-----------------------|---|---------------|---------------|---------------|
| 39                    | H | -7.6600956575 | 1.6538669455  | 2.3869845418  |
| 40                    | H | -5.9289717305 | 2.0178429762  | 2.5873416410  |
| 41                    | H | -6.4496940339 | 0.5965137602  | 1.6198776580  |
| 42                    | C | -5.7279844244 | 2.5697867795  | -0.0589550766 |
| 43                    | H | -6.8977187594 | 3.8402850230  | -1.3550712744 |
| 44                    | H | -5.0355252472 | 4.1841479887  | -2.9802108258 |
| 45                    | H | -4.3713148743 | 1.3687296390  | 1.0521357644  |
| 46                    | H | -0.7547190101 | 2.8060691880  | -3.4173138633 |
| 47                    | H | -0.2111725766 | 1.3536369735  | -1.4852447429 |
| 48                    | H | -1.7242718197 | -6.8939538628 | 1.0398076484  |
| 49                    | H | -2.9461487800 | -5.7250749880 | 1.5213723095  |
| 50                    | H | -1.2379373159 | -5.4393537008 | 1.9001809777  |
| 51                    | H | -0.8008189443 | -5.4499131336 | -0.6558356932 |
| 52                    | H | -2.5323774507 | -5.4965682047 | -0.8951137147 |
| 53                    | C | -2.9570667099 | -2.7674065773 | 1.8833170108  |
| 54                    | C | -1.7257761053 | -1.9298201761 | 2.2820682000  |
| 55                    | H | -1.7644318755 | -3.3307312405 | -1.3113759464 |
| 56                    | H | -0.1166735390 | -3.5861158966 | 1.1953125841  |
| 57                    | H | 0.2508425155  | -2.7418903616 | -0.3146560673 |
| 58                    | H | -3.9352083217 | -3.4149730341 | 0.0548393964  |
| 59                    | H | -2.9147800246 | -3.7465972981 | 2.3595045601  |
| 60                    | H | -3.8674499418 | -2.2793144437 | 2.2422504443  |
| 61                    | H | -1.0689739721 | -2.4486367495 | 2.9812248342  |
| 62                    | H | -1.9739569890 | -0.9623272627 | 2.7179743104  |
| 63                    | H | -3.8426864742 | -0.8809076947 | 0.2355925050  |
| 64                    | H | -3.2142453510 | -1.4612828165 | -1.2983146133 |
| 65                    | H | -1.0281477003 | -0.8011495596 | -0.8146131726 |
| 66                    | H | -2.6371696552 | 0.6472433173  | 1.2837359415  |
| 67                    | H | 1.7780594393  | -0.7885192425 | -1.8776049061 |
| 68                    | H | 3.3490281045  | 0.4342290209  | 1.9122543215  |
| 69                    | H | 5.9565685073  | -1.3059910673 | -1.0263213152 |
| 70                    | H | -0.0515584793 | -1.1454417001 | 1.2375251852  |
| 71                    | H | -0.9833837251 | 1.9564497803  | 1.9567308706  |
| <b>HQ-TU_iii</b>      |   |               |               |               |
| E = -2414.07045087777 |   |               |               |               |
| 1                     | C | -2.0472176723 | 2.7391297619  | 4.3388877056  |
| 2                     | O | -1.9177478688 | 1.7519447045  | 3.3296379966  |
| 3                     | C | -2.9302395540 | 3.2813845434  | 1.7142749142  |
| 4                     | C | -2.0197256849 | 1.1229423093  | 1.0977799259  |
| 5                     | C | -2.3347132812 | 1.3560610595  | -0.2633050401 |
| 6                     | C | -3.2673263215 | 3.5162843101  | 0.4075224712  |
| 7                     | C | -2.9784821317 | 2.5798741770  | -0.6136882266 |
| 8                     | C | -1.9929820076 | 0.4641263545  | -1.3317564238 |
| 9                     | C | -2.3207259237 | 0.8446959699  | -2.6100774604 |
| 10                    | C | -2.9945383730 | 2.0611296750  | -2.8404761637 |
| 11                    | N | -3.3160804872 | 2.9124305596  | -1.8930633778 |
| 12                    | C | -1.2279218710 | -0.8403157032 | -1.1177963799 |
| 13                    | C | -2.1364668550 | -2.0233120037 | -1.4997799659 |
| 14                    | C | -3.2943029849 | -2.3338939798 | -0.5369332600 |
| 15                    | C | -3.4090602689 | -3.8653722774 | -0.4090469374 |
| 16                    | C | -3.4214142573 | -4.4432286578 | -1.8445418861 |
| 17                    | C | -1.9953168176 | -4.2985127428 | -2.4152148201 |

---

|    |   |               |               |               |
|----|---|---------------|---------------|---------------|
| 18 | C | -3.9973330748 | -5.8557421601 | -2.0333455431 |
| 19 | C | -3.3954809233 | -6.9940971062 | -1.2097057605 |
| 20 | N | -1.2779625473 | -3.2519285887 | -1.6203494796 |
| 21 | N | -0.0284118661 | -0.9644666659 | -1.9385795856 |
| 22 | C | 1.0862848458  | -0.3963263291 | -1.5644775176 |
| 23 | N | 1.0252656255  | 0.5070649830  | -0.4899366592 |
| 24 | C | 1.9545976204  | 1.0458829315  | 0.3907376774  |
| 25 | C | 3.2744200169  | 0.6104442600  | 0.5490518441  |
| 26 | C | 4.0768014662  | 1.1889143997  | 1.5281290252  |
| 27 | C | 3.6093077967  | 2.1884327466  | 2.3715467437  |
| 28 | C | 1.4821632943  | 2.0627929888  | 1.2363244900  |
| 29 | C | 2.2946845679  | 2.6140364381  | 2.2120944763  |
| 30 | C | 5.5112584096  | 0.7481816240  | 1.6371722054  |
| 31 | C | 1.7243388214  | 3.6301434932  | 3.1623161153  |
| 32 | F | 6.0035374459  | 0.9405044648  | 2.8740164255  |
| 33 | F | 6.3073878917  | 1.4334276682  | 0.7932020541  |
| 34 | F | 5.6647387360  | -0.5538403269 | 1.3463163831  |
| 35 | F | 0.6796432320  | 4.2919704214  | 2.6331193336  |
| 36 | F | 2.6391143793  | 4.5489484554  | 3.5217395421  |
| 37 | F | 1.2844094597  | 3.0588365344  | 4.2983524221  |
| 38 | S | 2.5837348643  | -0.6958710690 | -2.3847376632 |
| 39 | H | -1.6191003060 | 2.2996349625  | 5.2396625371  |
| 40 | H | -3.0988236086 | 2.9827193058  | 4.5290932020  |
| 41 | H | -1.4906550413 | 3.6476062607  | 4.0876738548  |
| 42 | C | -2.2916625413 | 2.0657894113  | 2.0674640736  |
| 43 | H | -3.1522871391 | 4.0297893124  | 2.4654994084  |
| 44 | H | -3.7558357756 | 4.4395769845  | 0.1141245571  |
| 45 | H | -1.5290485928 | 0.2118873092  | 1.4197295374  |
| 46 | H | -3.2637862355 | 2.3426257129  | -3.8563427205 |
| 47 | H | -2.0310644253 | 0.2288891366  | -3.4557140419 |
| 48 | H | -3.6303579682 | -6.8983468684 | -0.1451549668 |
| 49 | H | -2.3065607645 | -7.0631004043 | -1.3124567519 |
| 50 | H | -3.8055018823 | -7.9534552150 | -1.5415134309 |
| 51 | H | -3.9114717919 | -6.1073911648 | -3.0986180667 |
| 52 | H | -5.0731115446 | -5.8079621019 | -1.8264488116 |
| 53 | C | -2.1836043806 | -4.3446278828 | 0.3891111206  |
| 54 | C | -0.9069872659 | -3.8053705725 | -0.2812531021 |
| 55 | H | -4.0748983905 | -3.7885968740 | -2.4341079744 |
| 56 | H | -1.4094914516 | -5.2163920496 | -2.3295405146 |
| 57 | H | -1.9926961958 | -3.9843132880 | -3.4598357798 |
| 58 | H | -4.3294529028 | -4.1351522875 | 0.1164097787  |
| 59 | H | -2.1468147355 | -5.4323433685 | 0.4478871060  |
| 60 | H | -2.2451916995 | -3.9709825534 | 1.4146952162  |
| 61 | H | -0.1569444814 | -4.5776679450 | -0.4550475883 |
| 62 | H | -0.4299350165 | -3.0037284522 | 0.2820639205  |
| 63 | H | -3.1087206280 | -1.8824678480 | 0.4444693818  |
| 64 | H | -4.2162333675 | -1.8938670328 | -0.9248931612 |
| 65 | H | -2.5041749932 | -1.8506519368 | -2.5141767247 |
| 66 | H | -0.9886892604 | -0.9372590897 | -0.0503945595 |
| 67 | H | 3.6607531397  | -0.1657197225 | -0.0976640917 |
| 68 | H | 0.4608772045  | 2.4151313355  | 1.1291933539  |
| 69 | H | 4.2477459394  | 2.6213699238  | 3.1316459359  |

---

|                       |   |               |               |               |
|-----------------------|---|---------------|---------------|---------------|
| 70                    | H | 0.1022825223  | 0.8816107255  | -0.3191077238 |
| 71                    | H | -0.4277241216 | -2.9062109457 | -2.1016125745 |
| <b>HQ-TU_iv</b>       |   |               |               |               |
| E = -2414.06531469050 |   |               |               |               |
| 1                     | C | -5.3083540352 | 1.7418740968  | 3.0718930307  |
| 2                     | O | -6.0575336090 | 2.3074431382  | 2.0072976050  |
| 3                     | C | -6.3116416872 | 2.8673585677  | -0.2468412052 |
| 4                     | C | -4.2511234995 | 1.8127165469  | 0.4776748277  |
| 5                     | C | -3.7570269912 | 1.8552394466  | -0.8562370984 |
| 6                     | C | -5.8544676846 | 2.9297443025  | -1.5287759338 |
| 7                     | C | -4.5669149393 | 2.4335369695  | -1.8743401813 |
| 8                     | C | -2.4721664134 | 1.3673211132  | -1.2457093178 |
| 9                     | C | -2.0966882486 | 1.5104149854  | -2.5615871448 |
| 10                    | C | -2.9786234196 | 2.0988812925  | -3.4863415205 |
| 11                    | N | -4.1765702539 | 2.5449475085  | -3.1734317875 |
| 12                    | C | -1.5317619152 | 0.6678700846  | -0.2755217424 |
| 13                    | C | -1.6115024236 | -0.8654284745 | -0.4955866583 |
| 14                    | C | -2.9634956876 | -1.5044737526 | -0.0870371147 |
| 15                    | C | -2.6450720794 | -2.8395646758 | 0.6142964012  |
| 16                    | C | -1.7089775320 | -3.6410308376 | -0.3222123661 |
| 17                    | C | -0.3523811960 | -2.8863071648 | -0.3614438264 |
| 18                    | C | -1.5619387145 | -5.1487674211 | -0.0641109750 |
| 19                    | C | -1.0543128133 | -5.6001668147 | 1.3064558254  |
| 20                    | N | -0.4852711021 | -1.5295664501 | 0.1784330803  |
| 21                    | N | -0.1280313086 | 1.0206196985  | -0.4769332976 |
| 22                    | C | 0.5194954957  | 2.1061807942  | 0.0273259355  |
| 23                    | N | 1.7790539423  | 2.1785829836  | 0.2803958329  |
| 24                    | C | 2.5554862873  | 1.0128756447  | 0.2157501521  |
| 25                    | C | 3.4856199233  | 0.8421279490  | -0.8119363439 |
| 26                    | C | 4.2861344630  | -0.2961980217 | -0.8540425684 |
| 27                    | C | 4.1840117806  | -1.2793859281 | 0.1210990970  |
| 28                    | C | 2.4553841159  | 0.0215983788  | 1.2030379816  |
| 29                    | C | 3.2615186987  | -1.1068147164 | 1.1490539989  |
| 30                    | C | 5.3157219506  | -0.4264800428 | -1.9434601986 |
| 31                    | C | 3.1289677631  | -2.1899800896 | 2.1844810804  |
| 32                    | F | 5.6804761628  | -1.7039943552 | -2.1434250795 |
| 33                    | F | 6.4361472936  | 0.2602019380  | -1.6486104002 |
| 34                    | F | 4.8652665470  | 0.0506423563  | -3.1161079497 |
| 35                    | F | 2.4457618688  | -1.7851423198 | 3.2668473842  |
| 36                    | F | 4.3306603061  | -2.6225507281 | 2.6067386646  |
| 37                    | F | 2.4854786173  | -3.2717132027 | 1.6984900839  |
| 38                    | S | -0.3910042748 | 3.5990779502  | 0.3856218307  |
| 39                    | H | -5.0961463397 | 0.6817768187  | 2.8893011994  |
| 40                    | H | -5.9342404015 | 1.8320340810  | 3.9596635959  |
| 41                    | H | -4.3718085684 | 2.2872456075  | 3.2356630480  |
| 42                    | C | -5.4999019699 | 2.3048270604  | 0.7753783925  |
| 43                    | H | -7.2916419786 | 3.2452180154  | 0.0241031868  |
| 44                    | H | -6.4542890086 | 3.3607553072  | -2.3233200164 |
| 45                    | H | -3.6364656878 | 1.3952373924  | 1.2627714746  |
| 46                    | H | -2.6790020510 | 2.2036151833  | -4.5266637031 |
| 47                    | H | -1.1157004113 | 1.1791839466  | -2.8873548808 |
| 48                    | H | -0.8173331584 | -6.6692186222 | 1.2862850704  |

|    |   |               |               |               |
|----|---|---------------|---------------|---------------|
| 49 | H | -1.8053313629 | -5.4556968563 | 2.0892889227  |
| 50 | H | -0.1419575977 | -5.0747315263 | 1.6115020667  |
| 51 | H | -0.8819641456 | -5.5415537324 | -0.8325574544 |
| 52 | H | -2.5306561811 | -5.6293596786 | -0.2520456879 |
| 53 | C | -1.9644897065 | -2.4791889304 | 1.9460283644  |
| 54 | C | -0.7209351492 | -1.6111568696 | 1.6252949260  |
| 55 | H | -2.1553819689 | -3.5689963027 | -1.3240321596 |
| 56 | H | 0.4138942753  | -3.3950982518 | 0.2307160523  |
| 57 | H | 0.0299750675  | -2.8211683490 | -1.3858459168 |
| 58 | H | -3.5688597630 | -3.3992441541 | 0.7969436347  |
| 59 | H | -1.6789105153 | -3.3700541226 | 2.5078480079  |
| 60 | H | -2.6726195673 | -1.9266814572 | 2.5738291766  |
| 61 | H | 0.1796543062  | -2.0245725055 | 2.0841505387  |
| 62 | H | -0.8299135575 | -0.5943870546 | 2.0171397482  |
| 63 | H | -3.5241661909 | -0.8565545094 | 0.5959253211  |
| 64 | H | -3.5953069816 | -1.6552057047 | -0.9675632155 |
| 65 | H | -1.4446715430 | -1.0244307903 | -1.5678880229 |
| 66 | H | -1.8191771451 | 0.9027199635  | 0.7539715614  |
| 67 | H | 3.5693436349  | 1.6069678312  | -1.5762415472 |
| 68 | H | 1.7442868182  | 0.1496046445  | 2.0111490604  |
| 69 | H | 4.8124005807  | -2.1612086012 | 0.0849219456  |
| 70 | H | -1.4786919454 | 3.3144060272  | -0.3481382024 |
| 71 | H | 0.4305128259  | 0.1628453899  | -0.4458345897 |

---

**HQ-TU\_v**

---

E = -2414.05993970912

---

|    |   |               |               |               |
|----|---|---------------|---------------|---------------|
| 1  | C | -4.3522472976 | 3.7655586654  | 2.3319203383  |
| 2  | O | -4.3617685898 | 4.3477653915  | 1.0368755022  |
| 3  | C | -3.8393039982 | 4.2880077731  | -1.2355535177 |
| 4  | C | -3.2605946743 | 2.3862216524  | 0.1544253959  |
| 5  | C | -2.6913439994 | 1.7323106780  | -0.9675911834 |
| 6  | C | -3.2985230383 | 3.6865701013  | -2.3334713108 |
| 7  | C | -2.7176774260 | 2.4060429555  | -2.2093360875 |
| 8  | C | -2.1099476381 | 0.4226044699  | -0.9064080653 |
| 9  | C | -1.5847181332 | -0.1132462675 | -2.0695408112 |
| 10 | C | -1.6257810861 | 0.5914559878  | -3.2620444655 |
| 11 | N | -2.1778028712 | 1.7975344907  | -3.3029362457 |
| 12 | C | -2.1911510965 | -0.3746488459 | 0.3897094157  |
| 13 | C | -1.8039024702 | -1.8664104639 | 0.2677578497  |
| 14 | C | -2.7169009201 | -2.6818016590 | -0.6972042912 |
| 15 | C | -2.9912141057 | -4.0516025102 | -0.0503888589 |
| 16 | C | -1.6159940334 | -4.6372710692 | 0.3465924212  |
| 17 | C | -1.0852971420 | -3.7657528615 | 1.5175978719  |
| 18 | C | -1.5327993529 | -6.1495723861 | 0.6058772923  |
| 19 | C | -2.4656168350 | -6.7523340421 | 1.6562247431  |
| 20 | N | -1.7991372653 | -2.4899636490 | 1.6064526557  |
| 21 | N | -1.5211067080 | 0.3126019830  | 1.4896786847  |
| 22 | C | -0.1718184459 | 0.6273269388  | 1.4602467867  |
| 23 | N | 0.3487430750  | 0.6181996210  | 0.2633879858  |
| 24 | C | 1.6716303716  | 0.8279551583  | -0.0450766716 |
| 25 | C | 1.9730673636  | 1.6304148175  | -1.1555906128 |
| 26 | C | 3.2807818792  | 1.7910619078  | -1.5995966314 |
| 27 | C | 4.3332687600  | 1.1472563912  | -0.9627272658 |

---

|                       |   |               |               |               |
|-----------------------|---|---------------|---------------|---------------|
| 28                    | C | 2.7456296462  | 0.1865823748  | 0.6011066275  |
| 29                    | C | 4.0439535159  | 0.3449675493  | 0.1393597800  |
| 30                    | C | 3.5394089858  | 2.6163190049  | -2.8285295738 |
| 31                    | C | 5.1826527296  | -0.3223890113 | 0.8582007930  |
| 32                    | F | 4.8153318995  | 3.0414528985  | -2.8978251541 |
| 33                    | F | 2.7549963962  | 3.7075738816  | -2.8766338664 |
| 34                    | F | 3.3006710364  | 1.9245706236  | -3.9582429245 |
| 35                    | F | 5.7981336749  | 0.5180542725  | 1.7143489066  |
| 36                    | F | 6.1294964070  | -0.7519396503 | 0.0023650115  |
| 37                    | F | 4.7859984995  | -1.3870400978 | 1.5751195681  |
| 38                    | S | 0.5493429962  | 1.0629768273  | 2.9839289528  |
| 39                    | H | -3.3304884977 | 3.5620414994  | 2.6720321702  |
| 40                    | H | -4.9418316257 | 2.8419692459  | 2.3541840467  |
| 41                    | H | -4.8126010964 | 4.4995811111  | 2.9929255754  |
| 42                    | C | -3.8149374566 | 3.6384293507  | 0.0258807249  |
| 43                    | H | -4.2887479564 | 5.2722896699  | -1.2995587924 |
| 44                    | H | -3.3118594636 | 4.1866483177  | -3.2967460174 |
| 45                    | H | -3.1875000895 | 1.9059305432  | 1.1188913060  |
| 46                    | H | -1.2203371441 | 0.2024745170  | -4.1877098928 |
| 47                    | H | -1.0961760831 | -1.0755256467 | -2.0687960710 |
| 48                    | H | -3.5088558174 | -6.7496015491 | 1.3253448680  |
| 49                    | H | -2.4135511292 | -6.2254651041 | 2.6161470783  |
| 50                    | H | -2.1932246167 | -7.7957785568 | 1.8471871994  |
| 51                    | H | -0.4948463495 | -6.3744338219 | 0.8878370583  |
| 52                    | H | -1.7017831522 | -6.6714597311 | -0.3447416552 |
| 53                    | C | -3.8886265361 | -3.7947857398 | 1.1706877618  |
| 54                    | C | -3.1667642430 | -2.7586630702 | 2.0700943605  |
| 55                    | H | -0.9526851934 | -4.4638989170 | -0.5128907983 |
| 56                    | H | -1.2076296173 | -4.2784669229 | 2.4799081876  |
| 57                    | H | -0.0131361860 | -3.5656258517 | 1.4043173705  |
| 58                    | H | -3.4954992753 | -4.7130409462 | -0.7635194707 |
| 59                    | H | -4.0936853442 | -4.7140718554 | 1.7228224153  |
| 60                    | H | -4.8571048507 | -3.4097571015 | 0.8317915621  |
| 61                    | H | -3.0992962332 | -3.1088503980 | 3.1054385852  |
| 62                    | H | -3.7185334169 | -1.8141573233 | 2.1075258588  |
| 63                    | H | -3.6652169310 | -2.1582304538 | -0.8787533191 |
| 64                    | H | -2.2406205675 | -2.8234860739 | -1.6716287592 |
| 65                    | H | -0.7609758215 | -1.9003474523 | -0.0695587811 |
| 66                    | H | -3.2581088917 | -0.3478559230 | 0.6540514835  |
| 67                    | H | 1.1554610078  | 2.1369122459  | -1.6581203160 |
| 68                    | H | 2.5449912096  | -0.4336411034 | 1.4652035926  |
| 69                    | H | 5.3516498172  | 1.2603860584  | -1.3134896052 |
| 70                    | H | -1.8406131730 | 0.0162732556  | 2.3999061060  |
| 71                    | H | -2.2142853853 | 2.2860838254  | -4.2009728778 |
| <b>HQ-TU_vi</b>       |   |               |               |               |
| E = -2414.06002676725 |   |               |               |               |
| 1                     | C | -7.1689617693 | 2.7020958911  | 2.2136538698  |
| 2                     | O | -5.9059250172 | 2.1023866264  | 1.9660443978  |
| 3                     | C | -5.8242459232 | 3.2189221949  | -0.2060401674 |
| 4                     | C | -4.0739768375 | 1.7420738816  | 0.5838968042  |
| 5                     | C | -3.3404507301 | 1.9418532077  | -0.6100684167 |
| 6                     | C | -5.1297346355 | 3.4281505092  | -1.3681981556 |

---

|    |   |               |               |               |
|----|---|---------------|---------------|---------------|
| 7  | C | -3.8803315424 | 2.8077768775  | -1.6066259767 |
| 8  | C | -2.0713475435 | 1.3388742454  | -0.8838656015 |
| 9  | C | -1.4614722775 | 1.6407027929  | -2.0768255273 |
| 10 | C | -2.0892175638 | 2.5066031238  | -2.9966341443 |
| 11 | N | -3.2542162421 | 3.0763834129  | -2.7889417449 |
| 12 | C | -1.3755318140 | 0.3913321598  | 0.0839406740  |
| 13 | C | -1.4668928695 | -1.0623176598 | -0.4210678521 |
| 14 | C | -2.9274692525 | -1.5737034526 | -0.5619434090 |
| 15 | C | -2.9507154621 | -3.0427101180 | -0.1027214500 |
| 16 | C | -1.8229147704 | -3.7690586036 | -0.8708241761 |
| 17 | C | -0.4819096309 | -3.2276406937 | -0.3094044927 |
| 18 | C | -1.8881048328 | -5.3020543796 | -0.9503312506 |
| 19 | C | -1.9347851482 | -6.0896236068 | 0.3589552737  |
| 20 | N | -0.6721548545 | -1.9687963179 | 0.4236986826  |
| 21 | N | 0.0231521929  | 0.7323400520  | 0.2058763088  |
| 22 | C | 0.4627430366  | 1.4967011876  | 1.1132173601  |
| 23 | N | 1.8129509750  | 1.6239924724  | 1.3570183497  |
| 24 | C | 2.8190300762  | 0.7597135344  | 0.9127510306  |
| 25 | C | 2.5815251960  | -0.5819312694 | 0.5854153408  |
| 26 | C | 3.6531636304  | -1.3875028492 | 0.2216069264  |
| 27 | C | 4.9564310793  | -0.9035694640 | 0.1688469041  |
| 28 | C | 4.1234344462  | 1.2547761023  | 0.8627127891  |
| 29 | C | 5.1776014862  | 0.4259753900  | 0.4969981801  |
| 30 | C | 3.3698637121  | -2.8183133788 | -0.1487980466 |
| 31 | C | 6.5653096049  | 1.0047872957  | 0.4722841310  |
| 32 | F | 4.4905162785  | -3.5599088924 | -0.2045796907 |
| 33 | F | 2.7806135886  | -2.9127929278 | -1.3569102362 |
| 34 | F | 2.5477415244  | -3.4093956545 | 0.7336830844  |
| 35 | F | 6.6351007052  | 2.0868065958  | -0.3245541134 |
| 36 | F | 7.4781248090  | 0.1241725273  | 0.0305862618  |
| 37 | F | 6.9560806029  | 1.4039282347  | 1.6964889368  |
| 38 | S | -0.4956603488 | 2.4784735491  | 2.2956974533  |
| 39 | H | -7.9156097102 | 2.3875463925  | 1.4761013783  |
| 40 | H | -7.0993577191 | 3.7954600323  | 2.2332227773  |
| 41 | H | -7.4748472733 | 2.3497709628  | 3.1989574343  |
| 42 | C | -5.2885952578 | 2.3622053321  | 0.7887160423  |
| 43 | H | -6.7771237847 | 3.7131520536  | -0.0591713321 |
| 44 | H | -5.5191307391 | 4.0809090769  | -2.1425575458 |
| 45 | H | -3.7101244120 | 1.0882649424  | 1.3680786887  |
| 46 | H | -1.5991682778 | 2.7335773432  | -3.9410474867 |
| 47 | H | -0.4854189872 | 1.2269924362  | -2.3090174356 |
| 48 | H | -2.8903598115 | -5.9628424244 | 0.8775171624  |
| 49 | H | -1.1341518322 | -5.8015844551 | 1.0498828942  |
| 50 | H | -1.8176946920 | -7.1599770826 | 0.1587928537  |
| 51 | H | -1.0134337161 | -5.6336964021 | -1.5270213485 |
| 52 | H | -2.7633665217 | -5.5791179720 | -1.5522281464 |
| 53 | C | -2.7008182752 | -3.0306398287 | 1.4163713889  |
| 54 | C | -1.3759646725 | -2.2663102139 | 1.6765943418  |
| 55 | H | -1.9026663851 | -3.4304854461 | -1.9140916680 |
| 56 | H | -0.0219397192 | -3.9420123343 | 0.3820809457  |
| 57 | H | 0.2432711634  | -3.0618778109 | -1.1121425662 |
| 58 | H | -3.9222774788 | -3.4976033028 | -0.3263778388 |

---



|                       |   |               |               |               |
|-----------------------|---|---------------|---------------|---------------|
| 59                    | H | -2.6501671829 | -4.0431402269 | 1.8213734114  |
| 60                    | H | -3.5405644637 | -2.5338558815 | 1.9156930105  |
| 61                    | H | -0.6966474838 | -2.8510673736 | 2.3052266492  |
| 62                    | H | -1.5556068684 | -1.3278602770 | 2.2106216035  |
| 63                    | H | -3.6157325395 | -0.9846082996 | 0.0570588676  |
| 64                    | H | -3.2697527384 | -1.4722340193 | -1.5971245800 |
| 65                    | H | -0.9789799489 | -1.0725015274 | -1.4036478556 |
| 66                    | H | -1.8710299984 | 0.4458339131  | 1.0609394625  |
| 67                    | H | 2.1269902899  | 2.4935462249  | 1.7735467056  |
| 68                    | H | 1.5731969323  | -0.9882786219 | 0.6075430832  |
| 69                    | H | 4.3173528291  | 2.2952881523  | 1.1075623206  |
| 70                    | H | 5.7772558027  | -1.5473165031 | -0.1177971570 |
| 71                    | H | -1.5213804070 | 2.7251405444  | 1.4668356318  |
| <b>HQ-TU_vii</b>      |   |               |               |               |
| E = -2414.05158183387 |   |               |               |               |
| 1                     | C | -2.6541411399 | 5.6105818238  | 1.4862387194  |
| 2                     | O | -2.7741919033 | 4.2025455741  | 1.4258906569  |
| 3                     | C | -2.5351549061 | 4.3086108619  | -1.0016436028 |
| 4                     | C | -2.7803465315 | 2.2261755777  | 0.1874033153  |
| 5                     | C | -2.7227587402 | 1.4856996911  | -0.9989564360 |
| 6                     | C | -2.5160700650 | 3.6030270903  | -2.1917136399 |
| 7                     | C | -2.6340891208 | 2.2125540070  | -2.2107201080 |
| 8                     | C | -2.7402118458 | -0.0037469405 | -1.0623402676 |
| 9                     | C | -3.1375538903 | -0.5232859594 | -2.3689672912 |
| 10                    | C | -3.0708091909 | 0.2415452921  | -3.4782117285 |
| 11                    | N | -2.7041842293 | 1.5507370660  | -3.4249626704 |
| 12                    | C | -2.3676321007 | -0.8550900645 | -0.0619767435 |
| 13                    | C | -2.3231398596 | -2.3606397773 | -0.2597032708 |
| 14                    | C | -3.6396050833 | -3.1101950826 | 0.0935515340  |
| 15                    | C | -3.2572375563 | -4.5462299371 | 0.5023026415  |
| 16                    | C | -2.2533268063 | -5.0690712651 | -0.5523520129 |
| 17                    | C | -0.9341526787 | -4.2767651681 | -0.3384158629 |
| 18                    | C | -2.0595725253 | -6.5896481606 | -0.6564695979 |
| 19                    | C | -1.6571262177 | -7.3558420706 | 0.6034806594  |
| 20                    | N | -1.1716375181 | -3.0248064557 | 0.3997003245  |
| 21                    | N | -1.9847763424 | -0.3854046647 | 1.2328711537  |
| 22                    | C | -0.7604807442 | 0.0616177292  | 1.5924711412  |
| 23                    | N | 0.1042580955  | 0.1807203386  | 0.5543453650  |
| 24                    | C | 1.3878784346  | 0.7415105306  | 0.5056004585  |
| 25                    | C | 1.7086850306  | 1.5061418381  | -0.6161947201 |
| 26                    | C | 2.9823816369  | 2.0448549839  | -0.7541110748 |
| 27                    | C | 3.9479849993  | 1.8401109424  | 0.2222781709  |
| 28                    | C | 2.3558233921  | 0.5183072993  | 1.4856937554  |
| 29                    | C | 3.6194500313  | 1.0756576145  | 1.3368303928  |
| 30                    | C | 3.3239342390  | 2.8189534836  | -1.9981732159 |
| 31                    | C | 4.6439993686  | 0.8839377375  | 2.4218532022  |
| 32                    | F | 4.3428703389  | 3.6725004581  | -1.7941407516 |
| 33                    | F | 2.2806840529  | 3.5377633678  | -2.4414993507 |
| 34                    | F | 3.6910035214  | 2.0037592320  | -3.0037115734 |
| 35                    | F | 4.6059028978  | 1.8839851400  | 3.3217183248  |
| 36                    | F | 5.8937839640  | 0.8554545024  | 1.9265083916  |
| 37                    | F | 4.4544224201  | -0.2607170575 | 3.0979479914  |

|    |   |               |               |               |
|----|---|---------------|---------------|---------------|
| 38 | S | -0.4364988211 | 0.4736601664  | 3.2050044025  |
| 39 | H | -3.4618756165 | 6.1113874064  | 0.9381511334  |
| 40 | H | -1.6833350717 | 5.9520335822  | 1.1062782571  |
| 41 | H | -2.7292833728 | 5.8731256516  | 2.5421322614  |
| 42 | C | -2.6943443658 | 3.6136667328  | 0.1998444080  |
| 43 | H | -2.4457524425 | 5.3879704200  | -1.0238446672 |
| 44 | H | -2.4280337721 | 4.1432542722  | -3.1300957310 |
| 45 | H | -2.8885804945 | 1.7350751046  | 1.1430325884  |
| 46 | H | -3.3032638125 | -0.1470779859 | -4.4623510308 |
| 47 | H | -3.4719388403 | -1.5454332189 | -2.4771889233 |
| 48 | H | -2.4632047497 | -7.3766336034 | 1.3438429511  |
| 49 | H | -0.7671905916 | -6.9348632008 | 1.0852048986  |
| 50 | H | -1.4251120066 | -8.3963219770 | 0.3522308580  |
| 51 | H | -1.3017698751 | -6.7689046023 | -1.4317209189 |
| 52 | H | -2.9890700783 | -7.0276984700 | -1.0426687334 |
| 53 | C | -2.6041477939 | -4.4386072753 | 1.8902132875  |
| 54 | C | -1.4639982694 | -3.3913142818 | 1.7937611312  |
| 55 | H | -2.6577247976 | -4.7741963589 | -1.5313595292 |
| 56 | H | -0.2085388831 | -4.8663856424 | 0.2354600305  |
| 57 | H | -0.4613622606 | -4.0447019470 | -1.2997290053 |
| 58 | H | -4.1443188280 | -5.1890833249 | 0.5419631573  |
| 59 | H | -2.2206290979 | -5.4032769866 | 2.2292604986  |
| 60 | H | -3.3547945687 | -4.1249148425 | 2.6247940937  |
| 61 | H | -0.5364898331 | -3.7768336028 | 2.2312478092  |
| 62 | H | -1.7063444770 | -2.4893994556 | 2.3556709711  |
| 63 | H | -4.1668811358 | -2.6135343609 | 0.9190258750  |
| 64 | H | -4.3199141096 | -3.1018810374 | -0.7659986366 |
| 65 | H | -2.1358361267 | -2.5111304639 | -1.3260421530 |
| 66 | H | 0.9517520032  | 1.6945983876  | -1.3711352550 |
| 67 | H | 2.1173143735  | -0.0824925832 | 2.3518222542  |
| 68 | H | 4.9386511476  | 2.2650579755  | 0.1171693392  |
| 69 | H | -2.7093779052 | 2.0992332647  | -4.2772837748 |
| 70 | H | -0.2904039195 | -0.0721686720 | -0.3483963974 |
| 71 | H | -2.6359150340 | -0.4800686486 | 2.0026522703  |

---

**HQ-TU\_viii**


---

E = -2414.04582841145

---

|    |   |               |               |               |
|----|---|---------------|---------------|---------------|
| 1  | C | -5.6814036148 | 2.8211006917  | 2.6814418451  |
| 2  | O | -5.9915749194 | 3.5409848181  | 1.4985783150  |
| 3  | C | -5.6043331072 | 4.0565241109  | -0.7463924193 |
| 4  | C | -4.2136200973 | 2.3878513662  | 0.3300159700  |
| 5  | C | -3.4895029580 | 2.2016322381  | -0.8791552359 |
| 6  | C | -4.9238366357 | 3.8956903376  | -1.9161265468 |
| 7  | C | -3.8498875613 | 2.9700185111  | -2.0188798015 |
| 8  | C | -2.4075509317 | 1.2754838880  | -1.0199293860 |
| 9  | C | -1.7917155409 | 1.1988078132  | -2.2449456267 |
| 10 | C | -2.2289178752 | 2.0101232776  | -3.3115859793 |
| 11 | N | -3.2179060708 | 2.8700234372  | -3.2217227435 |
| 12 | C | -1.9552530417 | 0.4402582782  | 0.1768001035  |
| 13 | C | -1.3142259853 | -0.9030425997 | -0.2180556664 |
| 14 | C | -2.3876815514 | -1.8449522806 | -0.8464402789 |
| 15 | C | -2.2362675684 | -3.2295104464 | -0.1942117193 |
| 16 | C | -0.7725981726 | -3.6684757066 | -0.4240373688 |

---

---

|    |   |               |               |               |
|----|---|---------------|---------------|---------------|
| 17 | C | 0.1228016903  | -2.6949378925 | 0.3896115116  |
| 18 | C | -0.4227554610 | -5.1487637533 | -0.2043084941 |
| 19 | C | -0.6824478164 | -5.7546591945 | 1.1755269638  |
| 20 | N | -0.6329530837 | -1.5494239547 | 0.9108452080  |
| 21 | N | -1.1846212250 | 1.2687072981  | 1.1169209464  |
| 22 | C | 0.0558535616  | 1.7480664241  | 1.0124810054  |
| 23 | N | 0.7687038937  | 1.3520859205  | -0.0976332779 |
| 24 | C | 1.7581507472  | 0.5368126180  | -0.0538174829 |
| 25 | C | 2.4287953052  | 0.2390418673  | -1.3154836791 |
| 26 | C | 3.3941464002  | -0.6937362003 | -1.3762226712 |
| 27 | C | 3.8282136299  | -1.4420356752 | -0.2022544225 |
| 28 | C | 2.2248850998  | -0.1513867274 | 1.2023028622  |
| 29 | C | 3.2840239071  | -1.1858175886 | 0.9912289085  |
| 30 | C | 4.0746614410  | -1.0308841502 | -2.6746221107 |
| 31 | C | 3.6989187892  | -1.9536655359 | 2.2123569662  |
| 32 | F | 5.4020816312  | -0.8322421423 | -2.5799831629 |
| 33 | F | 3.6262678741  | -0.3017658651 | -3.7024267759 |
| 34 | F | 3.8939431099  | -2.3267488814 | -2.9826463374 |
| 35 | F | 4.1785045946  | -1.1264965433 | 3.1604152133  |
| 36 | F | 4.6453425725  | -2.8672305869 | 1.9570219089  |
| 37 | F | 2.6514420476  | -2.6008198958 | 2.7566867074  |
| 38 | S | 0.6928391225  | 2.8742703114  | 2.1056429124  |
| 39 | H | -4.6619129199 | 3.0360487427  | 3.0225900068  |
| 40 | H | -5.8099028454 | 1.7420929218  | 2.5366965674  |
| 41 | H | -6.3886058008 | 3.1659583634  | 3.4358300498  |
| 42 | C | -5.2465714134 | 3.2936830339  | 0.3968918275  |
| 43 | H | -6.4241522490 | 4.7614405268  | -0.6596091203 |
| 44 | H | -5.1787003558 | 4.4670806654  | -2.8024679022 |
| 45 | H | -3.9528914667 | 1.8131757730  | 1.2080115852  |
| 46 | H | -1.7331188708 | 1.9402119759  | -4.2773149708 |
| 47 | H | -0.9615654287 | 0.5261070722  | -2.4205502111 |
| 48 | H | -1.7492843148 | -5.9149047903 | 1.3582936813  |
| 49 | H | -0.2909213883 | -5.1315858468 | 1.9881328118  |
| 50 | H | -0.1949742822 | -6.7318189039 | 1.2574359638  |
| 51 | H | 0.6445846000  | -5.2628296781 | -0.4384380294 |
| 52 | H | -0.9558362135 | -5.7469097645 | -0.9543389276 |
| 53 | C | -2.5816406321 | -3.0572761986 | 1.2966207657  |
| 54 | C | -1.5911089414 | -2.0334801718 | 1.9099348983  |
| 55 | H | -0.5729185056 | -3.4891124456 | -1.4894909597 |
| 56 | H | 0.5900534068  | -3.1952542787 | 1.2442831444  |
| 57 | H | 0.9399699048  | -2.3153792266 | -0.2356596637 |
| 58 | H | -2.9234699015 | -3.9431933915 | -0.6621454498 |
| 59 | H | -2.5405329218 | -4.0063382852 | 1.8336860786  |
| 60 | H | -3.6142601792 | -2.6986442257 | 1.3791781222  |
| 61 | H | -1.0119243048 | -2.4803103544 | 2.7242149819  |
| 62 | H | -2.1104971869 | -1.1736713065 | 2.3434163527  |
| 63 | H | -3.4011082177 | -1.4610398311 | -0.6744898846 |
| 64 | H | -2.2566830739 | -1.9034864807 | -1.9315032499 |
| 65 | H | -0.5266490840 | -0.7200780594 | -0.9514606414 |
| 66 | H | 2.1011896424  | 0.7896412892  | -2.1896639777 |
| 67 | H | 1.3361584647  | -0.6107526234 | 1.6627387586  |
| 68 | H | 4.5896954558  | -2.2039883046 | -0.3196507111 |

---

|                     |   |               |               |               |
|---------------------|---|---------------|---------------|---------------|
| 69                  | H | -2.8531507121 | 0.1838998089  | 0.7448604358  |
| 70                  | H | 2.5718034930  | 0.6121434445  | 1.9125968816  |
| 71                  | H | -1.7025659570 | 1.6282829632  | 1.9106046253  |
| <b>HQ-TU_ix</b>     |   |               |               |               |
| E = -2414.041261351 |   |               |               |               |
| 1                   | C | -4.9056757426 | 3.2794969777  | 2.5778769926  |
| 2                   | O | -5.1367462178 | 3.8984320336  | 1.3209344960  |
| 3                   | C | -4.7260316958 | 4.0988085015  | -0.9655844280 |
| 4                   | C | -3.6490683699 | 2.3101502088  | 0.2702287444  |
| 5                   | C | -2.9979007765 | 1.8828593877  | -0.9144768895 |
| 6                   | C | -4.1136424438 | 3.7108083607  | -2.1212261281 |
| 7                   | C | -3.2411009361 | 2.6020250230  | -2.1051946336 |
| 8                   | C | -2.1157311816 | 0.7511837368  | -0.9576274866 |
| 9                   | C | -1.5373555149 | 0.4196734361  | -2.1712327617 |
| 10                  | C | -1.7981295726 | 1.1676408137  | -3.3120088300 |
| 11                  | N | -2.6197079300 | 2.2063668373  | -3.2527846439 |
| 12                  | C | -1.9391759474 | -0.0886444327 | 0.3073611530  |
| 13                  | C | -1.2382115651 | -1.4396212226 | 0.0346312348  |
| 14                  | C | -2.1448506776 | -2.3771965930 | -0.8293089454 |
| 15                  | C | -2.3490959809 | -3.6930446410 | -0.0595474010 |
| 16                  | C | -0.9486933093 | -4.3217010978 | 0.1041247400  |
| 17                  | C | -0.1056614383 | -3.3233207308 | 0.9505633788  |
| 18                  | C | -0.8619924052 | -5.7780389020 | 0.5904147541  |
| 19                  | C | -1.4331225473 | -6.1222623742 | 1.9668227379  |
| 20                  | N | -0.8405965444 | -2.1019970263 | 1.2855556478  |
| 21                  | N | -1.4681598181 | 0.6451780535  | 1.4830053342  |
| 22                  | C | -0.5508442884 | 1.5491644134  | 1.4101250889  |
| 23                  | N | 0.1802496317  | 1.7328957661  | 0.1783286771  |
| 24                  | C | 1.3088309685  | 0.9815569377  | -0.1297155978 |
| 25                  | C | 2.0499254220  | 1.3226173811  | -1.2682212759 |
| 26                  | C | 3.1859056937  | 0.6014037812  | -1.6148898477 |
| 27                  | C | 3.6113359554  | -0.4738066518 | -0.8474629503 |
| 28                  | C | 1.7266273446  | -0.1139054476 | 0.6439760715  |
| 29                  | C | 2.8670546502  | -0.8149061913 | 0.2795194521  |
| 30                  | C | 3.9231721614  | 0.9576836764  | -2.8766060916 |
| 31                  | C | 3.3464650139  | -1.9775949942 | 1.1042475293  |
| 32                  | F | 5.2083747368  | 0.5598144028  | -2.8397752098 |
| 33                  | F | 3.9216161897  | 2.2827339497  | -3.1039860027 |
| 34                  | F | 3.3677278698  | 0.3801001556  | -3.9567181594 |
| 35                  | F | 4.6398004805  | -1.8300937114 | 1.4540637664  |
| 36                  | F | 3.2732836012  | -3.1344439036 | 0.4151095773  |
| 37                  | F | 2.6452774612  | -2.1436122438 | 2.2346539972  |
| 38                  | S | -0.1528412998 | 2.6387871038  | 2.7041143665  |
| 39                  | H | -3.8451961514 | 3.3129415588  | 2.8527438770  |
| 40                  | H | -5.2518635465 | 2.2394692932  | 2.5762923381  |
| 41                  | H | -5.4882640671 | 3.8495460115  | 3.3014332976  |
| 42                  | C | -4.4880171224 | 3.4008298906  | 0.2468836018  |
| 43                  | H | -5.3971882114 | 4.9497723619  | -0.9448310606 |
| 44                  | H | -4.2935600056 | 4.2501793613  | -3.0459098200 |
| 45                  | H | -3.4208978634 | 1.7978908778  | 1.1957921619  |
| 46                  | H | -1.3576536393 | 0.9409334283  | -4.2752401419 |
| 47                  | H | -0.8574353980 | -0.4155190319 | -2.2634287530 |

|    |   |               |               |               |
|----|---|---------------|---------------|---------------|
| 48 | H | -2.5264927889 | -6.1495432468 | 1.9642716610  |
| 49 | H | -1.1163198281 | -5.4131425161 | 2.7406348910  |
| 50 | H | -1.0911660821 | -7.1142812180 | 2.2805393506  |
| 51 | H | 0.2025384626  | -6.0501685938 | 0.5812062111  |
| 52 | H | -1.3396215690 | -6.4243536511 | -0.1573989868 |
| 53 | C | -3.0084495964 | -3.3259644204 | 1.2827751783  |
| 54 | C | -2.0112593635 | -2.4551235057 | 2.0895359898  |
| 55 | H | -0.5174347456 | -4.3446996339 | -0.9062493138 |
| 56 | H | 0.2248333157  | -3.7773295509 | 1.8927557313  |
| 57 | H | 0.8019332285  | -3.0397708159 | 0.4114341338  |
| 58 | H | -2.9995430777 | -4.3648461809 | -0.6309012558 |
| 59 | H | -3.3048030461 | -4.2106783920 | 1.8497356864  |
| 60 | H | -3.9306411098 | -2.7676532368 | 1.0780826485  |
| 61 | H | -1.6458697549 | -2.9932570474 | 2.9715478607  |
| 62 | H | -2.4644901376 | -1.5302833403 | 2.4589793321  |
| 63 | H | -3.1180599750 | -1.9098183817 | -1.0254716330 |
| 64 | H | -1.6869175107 | -2.5819524193 | -1.8031576691 |
| 65 | H | -0.2940437398 | -1.2483976629 | -0.4860083477 |
| 66 | H | -2.9745344964 | -0.3613912753 | 0.5743243730  |
| 67 | H | 1.7353560287  | 2.1668163755  | -1.8743533666 |
| 68 | H | 1.1509782854  | -0.4182937977 | 1.5109701490  |
| 69 | H | 4.5049140224  | -1.0269800283 | -1.1101516908 |
| 70 | H | -2.8034595448 | 2.7298926551  | -4.1127734202 |
| 71 | H | 0.3144980502  | 2.7158753596  | -0.0360334707 |

---

**HQ-TU\_x**


---

E = -2414.02181102982

|    |   |               |               |               |
|----|---|---------------|---------------|---------------|
| 1  | C | -5.2626247950 | 3.3933538714  | 2.0907917512  |
| 2  | O | -5.3695241264 | 3.8802949908  | 0.7624902436  |
| 3  | C | -4.7536699889 | 3.8287511550  | -1.4913256027 |
| 4  | C | -3.7368559339 | 2.2470951474  | 0.0407570309  |
| 5  | C | -2.9730895585 | 1.6998138674  | -1.0252016342 |
| 6  | C | -4.0225630095 | 3.3257558409  | -2.5260138627 |
| 7  | C | -3.1088064699 | 2.2553196422  | -2.3255448661 |
| 8  | C | -2.0653227668 | 0.6065199755  | -0.8614713285 |
| 9  | C | -1.3575228750 | 0.1988822274  | -1.9627408326 |
| 10 | C | -1.5602343726 | 0.8282192315  | -3.2078768978 |
| 11 | N | -2.4051876713 | 1.8142190536  | -3.4057568602 |
| 12 | C | -1.9268942650 | -0.0650694627 | 0.4973094140  |
| 13 | C | -1.2969489894 | -1.4692019983 | 0.4941727065  |
| 14 | C | -2.0592009286 | -2.4971937178 | -0.3874450500 |
| 15 | C | -2.0415596956 | -3.8472571018 | 0.3547185341  |
| 16 | C | -0.5736452984 | -4.1121925405 | 0.7661536849  |
| 17 | C | -0.2307078974 | -3.0838240662 | 1.8774312060  |
| 18 | C | -0.1824820347 | -5.5573197156 | 1.1101841821  |
| 19 | C | -0.9601556932 | -6.2718228132 | 2.2154096798  |
| 20 | N | -1.1803476884 | -1.9659863387 | 1.8791134671  |
| 21 | N | -1.2850523629 | 0.8360104359  | 1.4532811836  |
| 22 | C | 0.0269107088  | 1.1907253156  | 1.3719746353  |
| 23 | N | 0.8476941362  | 0.9320568083  | 0.3968097392  |
| 24 | C | 2.0845107461  | 1.5041849518  | 0.6408748329  |
| 25 | C | 3.2341213181  | 1.3781214467  | -0.2422569192 |
| 26 | C | 3.4000608320  | 0.6450576445  | -1.3511011133 |

---

|                         |   |               |               |               |
|-------------------------|---|---------------|---------------|---------------|
| 27                      | C | 1.7922783702  | -0.0238327605 | -3.1138169967 |
| 28                      | C | 2.1987295395  | 2.2034122960  | 1.8059304758  |
| 29                      | C | 2.4227864477  | -0.2890816406 | -1.9738047531 |
| 30                      | C | 4.7109804669  | 0.7325928406  | -2.0898687246 |
| 31                      | C | 2.2964200742  | -1.6578329449 | -1.3502556045 |
| 32                      | F | 5.2585822897  | -0.4848319182 | -2.2597669239 |
| 33                      | F | 5.6233637354  | 1.4917545701  | -1.4620549747 |
| 34                      | F | 4.5513970719  | 1.2572984162  | -3.3225298626 |
| 35                      | F | 3.3278738621  | -2.4518415295 | -1.6880597510 |
| 36                      | F | 1.1737395155  | -2.2928511467 | -1.7521000104 |
| 37                      | F | 2.2691330540  | -1.6145766391 | -0.0107237855 |
| 38                      | S | 0.7089795878  | 2.1805751122  | 2.6711389666  |
| 39                      | H | -4.2448478266 | 3.5152903991  | 2.4793792931  |
| 40                      | H | -5.5621602998 | 2.3406821633  | 2.1542475365  |
| 41                      | H | -5.9474826802 | 3.9964867692  | 2.6871349686  |
| 42                      | C | -4.6064090249 | 3.2880894799  | -0.1858131129 |
| 43                      | H | -5.4516302840 | 4.6465891110  | -1.6353792872 |
| 44                      | H | -4.1123591514 | 3.7262001434  | -3.5304284768 |
| 45                      | H | -3.5992250441 | 1.8602705390  | 1.0403841964  |
| 46                      | H | -0.9996070325 | 0.4930672909  | -4.0782873174 |
| 47                      | H | -0.6292756283 | -0.5974318481 | -1.8910260169 |
| 48                      | H | -1.9873964727 | -6.4966912638 | 1.9115815508  |
| 49                      | H | -1.0015423582 | -5.6889258948 | 3.1428195353  |
| 50                      | H | -0.4804989651 | -7.2264490138 | 2.4562607349  |
| 51                      | H | 0.8827332454  | -5.5493549899 | 1.3806377022  |
| 52                      | H | -0.2502771213 | -6.1594133086 | 0.1947688455  |
| 53                      | C | -2.9621043126 | -3.6919855280 | 1.5761584276  |
| 54                      | C | -2.4716498028 | -2.4589897615 | 2.3771930107  |
| 55                      | H | 0.0373701199  | -3.8541444431 | -0.1083245000 |
| 56                      | H | -0.2612380753 | -3.5468487212 | 2.8715743985  |
| 57                      | H | 0.7803411547  | -2.6896027592 | 1.7362592139  |
| 58                      | H | -2.4052953145 | -4.6463963095 | -0.3011796156 |
| 59                      | H | -2.9569485182 | -4.5884978451 | 2.1992480194  |
| 60                      | H | -3.9943735893 | -3.5516883308 | 1.2360871572  |
| 61                      | H | -2.3474882216 | -2.6990822999 | 3.4381709229  |
| 62                      | H | -3.2032582567 | -1.6462292594 | 2.3312002230  |
| 63                      | H | -3.0955050413 | -2.1788677691 | -0.5649953914 |
| 64                      | H | -1.5862139136 | -2.5897513243 | -1.3697503508 |
| 65                      | H | -0.2709505158 | -1.3665422956 | 0.1356323277  |
| 66                      | H | 4.0804761463  | 1.9840843246  | 0.0670431191  |
| 67                      | H | 1.1464306584  | -0.7535515538 | -3.5902590520 |
| 68                      | H | -2.9496220561 | -0.1741702405 | 0.8760819381  |
| 69                      | H | 3.0711003114  | 2.7096387772  | 2.1959220413  |
| 70                      | H | -1.6185159825 | 0.7019674503  | 2.4010060162  |
| 71                      | H | 1.9059885184  | 0.9343398051  | -3.6073734370 |
| <b>Q-TU<sub>i</sub></b> |   |               |               |               |
| E = -2412.85477732600   |   |               |               |               |
| 1                       | C | -8.7329492995 | 3.0988204951  | -2.8273382563 |
| 2                       | O | -9.2884512473 | 2.3015561712  | -1.7943594600 |
| 3                       | C | -9.1184910454 | 1.2176810314  | 0.2697870611  |
| 4                       | C | -7.1819895409 | 2.3833853067  | -0.6067154199 |
| 5                       | C | -6.4316984759 | 2.0126020397  | 0.5431081974  |

---

|    |   |                |               |               |
|----|---|----------------|---------------|---------------|
| 6  | C | -8.4152119807  | 0.8390430808  | 1.3740723214  |
| 7  | C | -7.0557604459  | 1.2188476162  | 1.5455126521  |
| 8  | C | -5.0725465569  | 2.3876694969  | 0.7602391615  |
| 9  | C | -4.4600063153  | 1.9466001569  | 1.9088036052  |
| 10 | C | -5.1664496294  | 1.1530222441  | 2.8295875320  |
| 11 | N | -6.4226636419  | 0.7946426485  | 2.6741642075  |
| 12 | C | -4.3210698323  | 3.3253665747  | -0.1687383999 |
| 13 | C | -4.3021634082  | 4.7504022250  | 0.4517012070  |
| 14 | C | -5.6607591976  | 5.4859686982  | 0.4202047121  |
| 15 | C | -5.3701641871  | 6.9658403435  | 0.1199545936  |
| 16 | C | -4.2599894851  | 7.4644492078  | 1.0829537796  |
| 17 | C | -2.9571734939  | 6.7072653950  | 0.7043052834  |
| 18 | C | -4.1674420642  | 8.9675236784  | 1.0981356035  |
| 19 | C | -3.0911860026  | 9.7284135391  | 0.9206683036  |
| 20 | N | -3.2506091116  | 5.5693364950  | -0.1729185651 |
| 21 | N | -2.9236308333  | 2.9744871155  | -0.3341363442 |
| 22 | C | -2.4353374653  | 1.9446144397  | -1.0405757774 |
| 23 | N | -1.0745821237  | 1.9456048982  | -1.2041506712 |
| 24 | C | -0.1742872021  | 2.9559291987  | -0.8000006295 |
| 25 | C | -0.1792743927  | 3.4528343789  | 0.5066811950  |
| 26 | C | 0.6716616034   | 4.4919169454  | 0.8533290058  |
| 27 | C | 1.5800959654   | 5.0103489034  | -0.0640913069 |
| 28 | C | 0.7371838034   | 3.4654732662  | -1.7229935485 |
| 29 | C | 1.6166572798   | 4.4756085667  | -1.3445639582 |
| 30 | C | 0.6486643473   | 5.0362609305  | 2.2565428823  |
| 31 | C | 2.6174464689   | 4.9811029053  | -2.3491540510 |
| 32 | F | 0.8974100036   | 6.3561140973  | 2.2777925158  |
| 33 | F | 1.5765319077   | 4.4478555586  | 3.0333138396  |
| 34 | F | -0.5411297181  | 4.8420378198  | 2.8516264142  |
| 35 | F | 3.6440809795   | 4.1227801405  | -2.4905534106 |
| 36 | F | 3.1369874684   | 6.1665444939  | -1.9917015147 |
| 37 | F | 2.0659906411   | 5.1322618076  | -3.5649660473 |
| 38 | S | -3.3789301235  | 0.7046056205  | -1.7034889628 |
| 39 | H | -8.4156221962  | 4.0773367419  | -2.4476689815 |
| 40 | H | -9.5295768790  | 3.2408398768  | -3.5580022277 |
| 41 | H | -7.8871591992  | 2.5958655480  | -3.3109553541 |
| 42 | C | -8.4943445533  | 1.9974851128  | -0.7403573229 |
| 43 | H | -10.1560368373 | 0.9319781870  | 0.1331018347  |
| 44 | H | -8.8688391920  | 0.2382942131  | 2.1553896475  |
| 45 | H | -6.7058721108  | 2.9554408308  | -1.3901867547 |
| 46 | H | -4.6722907394  | 0.8056931670  | 3.7344811485  |
| 47 | H | -3.4250709561  | 2.2034927539  | 2.1112137706  |
| 48 | H | -2.0978861548  | 9.3274693000  | 0.7395196032  |
| 49 | H | -3.1621817996  | 10.8112931083 | 0.9673449178  |
| 50 | H | -5.1179358734  | 9.4670278344  | 1.2925163305  |
| 51 | C | -4.8626725403  | 7.0745650405  | -1.3245798130 |
| 52 | C | -3.6901391277  | 6.0731074464  | -1.4835561795 |
| 53 | H | -4.5609526591  | 7.1636353495  | 2.0978353968  |
| 54 | H | -2.2625263920  | 7.3530750646  | 0.1592879085  |
| 55 | H | -2.4326812569  | 6.3445536989  | 1.5928938034  |
| 56 | H | -6.2777762713  | 7.5629047357  | 0.2545145132  |
| 57 | H | -4.5340543188  | 8.0993573429  | -1.5288212375 |

---

|    |   |               |              |               |
|----|---|---------------|--------------|---------------|
| 58 | H | -5.6693279128 | 6.8469434298 | -2.0292053873 |
| 59 | H | -2.8279955755 | 6.5374994427 | -1.9707713755 |
| 60 | H | -3.9749642168 | 5.2152474513 | -2.1007088882 |
| 61 | H | -6.3187792464 | 5.0777444968 | -0.3553143439 |
| 62 | H | -6.1842316106 | 5.3646987917 | 1.3732628606  |
| 63 | H | -3.9862314290 | 4.6200352989 | 1.4939268625  |
| 64 | H | -4.8011250248 | 3.3417134387 | -1.1522615717 |
| 65 | H | -2.3612654920 | 3.8313455413 | -0.2778132222 |
| 66 | H | -0.7256704215 | 1.2617817185 | -1.8649212726 |
| 67 | H | -0.8610659986 | 3.0399258380 | 1.2396659435  |
| 68 | H | 0.7390072206  | 3.0886861200 | -2.7408069140 |
| 69 | H | 2.2401351164  | 5.8232855492 | 0.2121085551  |

---

**Q-TU\_ii**

---

E = -2412.84445313069

---

|    |   |               |               |               |
|----|---|---------------|---------------|---------------|
| 1  | C | -6.7328772091 | 1.3352837622  | 1.7650637712  |
| 2  | O | -6.8415225987 | 2.2712945131  | 0.7035067446  |
| 3  | C | -5.9218292010 | 3.4128910024  | -1.1184177999 |
| 4  | C | -4.5178722949 | 1.8963336879  | 0.1487889677  |
| 5  | C | -3.4199489858 | 2.1814307971  | -0.7111965125 |
| 6  | C | -4.8839642433 | 3.7077915326  | -1.9508844931 |
| 7  | C | -3.6080414449 | 3.1029044824  | -1.7792171575 |
| 8  | C | -2.1281567569 | 1.5873220070  | -0.5802659755 |
| 9  | C | -1.1604261362 | 1.9417028359  | -1.4922695845 |
| 10 | C | -1.4532537942 | 2.8688732993  | -2.5080019778 |
| 11 | N | -2.6277595010 | 3.4418384918  | -2.6618013269 |
| 12 | C | -1.7864924881 | 0.5866348362  | 0.5234381272  |
| 13 | C | -1.6229696648 | -0.8055253218 | -0.1159981340 |
| 14 | C | -2.9653109412 | -1.4388833277 | -0.5458020191 |
| 15 | C | -3.2191570270 | -2.6975268461 | 0.2953265923  |
| 16 | C | -2.1311138552 | -3.7491623929 | -0.0438279500 |
| 17 | C | -0.7562170611 | -3.0763311449 | 0.1521222975  |
| 18 | C | -2.3608532250 | -5.0263476587 | 0.7257454915  |
| 19 | C | -1.5917670283 | -5.5922914743 | 1.6507857381  |
| 20 | N | -0.9422474309 | -1.7534437486 | 0.8250619345  |
| 21 | N | -0.6936569465 | 1.0436336873  | 1.3960892244  |
| 22 | C | 0.6717549965  | 1.0730532528  | 1.1365975632  |
| 23 | N | 1.1014498892  | 0.0766445882  | 0.3909258084  |
| 24 | C | 2.4233880364  | -0.1693263334 | 0.0552830369  |
| 25 | C | 2.6735626233  | -0.6609515669 | -1.2326761380 |
| 26 | C | 3.9523565349  | -1.0352052198 | -1.6291915307 |
| 27 | C | 5.0231408041  | -0.9457500330 | -0.7501912735 |
| 28 | C | 3.5104600664  | -0.0841442125 | 0.9415983064  |
| 29 | C | 4.7809021376  | -0.4716464736 | 0.5363426226  |
| 30 | C | 4.1658507675  | -1.5016883375 | -3.0415832179 |
| 31 | C | 5.9346014685  | -0.3373194328 | 1.4907050346  |
| 32 | F | 5.3331097903  | -2.1524290165 | -3.1936289442 |
| 33 | F | 4.1781407911  | -0.4695589291 | -3.9097649487 |
| 34 | F | 3.1913429774  | -2.3316689363 | -3.4494859380 |
| 35 | F | 6.5642929230  | 0.8472155885  | 1.3517045027  |
| 36 | F | 6.8643979149  | -1.2900176389 | 1.2902999836  |
| 37 | F | 5.5480582293  | -0.4240730075 | 2.7741457751  |
| 38 | S | 1.5546265942  | 2.3828773875  | 1.8483849865  |

---



|    |   |               |               |               |
|----|---|---------------|---------------|---------------|
| 39 | H | -7.7198101998 | 1.2875229648  | 2.2253608135  |
| 40 | H | -6.0039894973 | 1.6645506644  | 2.5146476025  |
| 41 | H | -6.4639299724 | 0.3404041334  | 1.3908674241  |
| 42 | C | -5.7406373362 | 2.4909254834  | -0.0526659172 |
| 43 | H | -6.8980424382 | 3.8678278782  | -1.2477673663 |
| 44 | H | -4.9979879596 | 4.4079502473  | -2.7717651803 |
| 45 | H | -4.3909582068 | 1.2079680710  | 0.9723501094  |
| 46 | H | -0.6806076342 | 3.1471647949  | -3.2213958190 |
| 47 | H | -0.1628440662 | 1.5188555628  | -1.4289963023 |
| 48 | H | -1.8946547068 | -6.5150755051 | 2.1361539771  |
| 49 | H | -0.6321763110 | -5.1930101445 | 1.9675801839  |
| 50 | H | -3.3044646119 | -5.5139616071 | 0.4796553461  |
| 51 | C | -3.1346263837 | -2.3280411077 | 1.7831295912  |
| 52 | C | -1.6847593268 | -1.9314653208 | 2.1129075837  |
| 53 | H | -2.2398788794 | -3.9943898827 | -1.1067001317 |
| 54 | H | -0.0695957151 | -3.6528378731 | 0.7710536025  |
| 55 | H | -0.2558540595 | -2.8795934884 | -0.7967128842 |
| 56 | H | -4.2069966058 | -3.1037519492 | 0.0630004592  |
| 57 | H | -3.4359461182 | -3.1698502480 | 2.4100641991  |
| 58 | H | -3.8197552240 | -1.5012154204 | 1.9953646914  |
| 59 | H | -1.1600500292 | -2.7140328612 | 2.6627132427  |
| 60 | H | -1.5954259821 | -1.0012107222 | 2.6722642591  |
| 61 | H | -3.7824675706 | -0.7249168389 | -0.4095954528 |
| 62 | H | -2.9388956288 | -1.6855159103 | -1.6105366536 |
| 63 | H | -0.9333953248 | -0.7193781063 | -0.9544800480 |
| 64 | H | -2.6352334907 | 0.5223598862  | 1.2055910120  |
| 65 | H | 1.8424451732  | -0.7464148401 | -1.9257954942 |
| 66 | H | 3.3504555089  | 0.2855627371  | 1.9455276802  |
| 67 | H | 6.0171669045  | -1.2523078075 | -1.0507709103 |
| 68 | H | -0.0078895149 | -1.3152316094 | 0.9604868794  |
| 69 | H | -0.9866135036 | 1.8263941196  | 1.9642919159  |

---

**Q-TU\_iii**

$$E = -2412.83046539741$$

|    |   |               |               |               |
|----|---|---------------|---------------|---------------|
| 1  | C | -2.0628524877 | 2.6571011541  | 4.3668800949  |
| 2  | O | -1.9100888493 | 1.6848602515  | 3.3463835686  |
| 3  | C | -2.9511413275 | 3.2114300530  | 1.7466394300  |
| 4  | C | -1.9925729215 | 1.0807842697  | 1.1068794783  |
| 5  | C | -2.3072246422 | 1.3242776226  | -0.2524870552 |
| 6  | C | -3.2880443169 | 3.4555970158  | 0.4415461554  |
| 7  | C | -2.9747063233 | 2.5388878887  | -0.5902844484 |
| 8  | C | -1.9430731855 | 0.4531919672  | -1.3306371252 |
| 9  | C | -2.2718029830 | 0.8437742606  | -2.6056233241 |
| 10 | C | -2.9688609194 | 2.0493324726  | -2.8238368751 |
| 11 | N | -3.3128142438 | 2.8811188546  | -1.8669961947 |
| 12 | C | -1.1554814067 | -0.8399986120 | -1.1292183389 |
| 13 | C | -2.0424035360 | -2.0331540850 | -1.5290607364 |
| 14 | C | -3.2002701915 | -2.3741639887 | -0.5805955425 |
| 15 | C | -3.2918117127 | -3.9053370326 | -0.4568297237 |
| 16 | C | -3.2793120287 | -4.5068115984 | -1.8774671585 |
| 17 | C | -1.8602835617 | -4.2889874944 | -2.4696773390 |
| 18 | C | -3.6689444872 | -5.9580322443 | -1.9974172208 |
| 19 | C | -4.1658526786 | -6.7386713212 | -1.0431784804 |

---

|    |   |               |               |               |
|----|---|---------------|---------------|---------------|
| 20 | N | -1.1661926597 | -3.2472059730 | -1.6538754229 |
| 21 | N | 0.0489249163  | -0.9359526321 | -1.9462474432 |
| 22 | C | 1.1511798347  | -0.3478537722 | -1.5656514397 |
| 23 | N | 1.0690016591  | 0.5463709338  | -0.4854798129 |
| 24 | C | 1.9843031671  | 1.1086512583  | 0.3954171049  |
| 25 | C | 3.3198193302  | 0.7201295009  | 0.5429385620  |
| 26 | C | 4.1063392177  | 1.3200441268  | 1.5222015768  |
| 27 | C | 3.6082078824  | 2.2958977392  | 2.3755723826  |
| 28 | C | 1.4803272267  | 2.1011521074  | 1.2519724621  |
| 29 | C | 2.2779608064  | 2.6746678462  | 2.2268532816  |
| 30 | C | 5.5565030166  | 0.9306581935  | 1.6192183159  |
| 31 | C | 1.6783067808  | 3.6647920201  | 3.1864256811  |
| 32 | F | 6.0502658093  | 1.1344609407  | 2.8536381613  |
| 33 | F | 6.3214924152  | 1.6481670861  | 0.7732685182  |
| 34 | F | 5.7546882027  | -0.3635350465 | 1.3205931146  |
| 35 | F | 0.6072622397  | 4.2919363384  | 2.6677476783  |
| 36 | F | 2.5622354149  | 4.6136874231  | 3.5448731513  |
| 37 | F | 1.2666204283  | 3.0720789024  | 4.3220602250  |
| 38 | S | 2.6559872776  | -0.6122591430 | -2.3844641715 |
| 39 | H | -1.6252870515 | 2.2171764273  | 5.2629032679  |
| 40 | H | -3.1199222904 | 2.8743057768  | 4.5588784712  |
| 41 | H | -1.5272939620 | 3.5809084858  | 4.1265034045  |
| 42 | C | -2.2874114731 | 2.0057501980  | 2.0870680266  |
| 43 | H | -3.1923099661 | 3.9452346445  | 2.5063248228  |
| 44 | H | -3.7951937353 | 4.3718586555  | 0.1578886591  |
| 45 | H | -1.4835076916 | 0.1766171553  | 1.4195840555  |
| 46 | H | -3.2385314963 | 2.3387532334  | -3.8373467687 |
| 47 | H | -1.9659499067 | 0.2445997773  | -3.4574959727 |
| 48 | H | -4.3465714523 | -6.3940807005 | -0.0287920876 |
| 49 | H | -4.4240431877 | -7.7735758749 | -1.2465095193 |
| 50 | H | -3.5248863672 | -6.3849071096 | -2.9906489208 |
| 51 | C | -2.0659491247 | -4.4027690577 | 0.3254500307  |
| 52 | C | -0.7972027621 | -3.8146405483 | -0.3183957611 |
| 53 | H | -3.9898066356 | -3.9359044857 | -2.4899609573 |
| 54 | H | -1.2504166686 | -5.1931540844 | -2.4164476574 |
| 55 | H | -1.8826075383 | -3.9431652141 | -3.5037167788 |
| 56 | H | -4.2133063654 | -4.1766083916 | 0.0631129651  |
| 57 | H | -2.0274270163 | -5.4949112231 | 0.3149831266  |
| 58 | H | -2.1285351607 | -4.0873511782 | 1.3699559693  |
| 59 | H | -0.0222880166 | -4.5611769381 | -0.4944606660 |
| 60 | H | -0.3536465282 | -3.0084615874 | 0.2652722220  |
| 61 | H | -3.0325122810 | -1.9286770466 | 0.4065874371  |
| 62 | H | -4.1285111374 | -1.9500406057 | -0.9710126067 |
| 63 | H | -2.4054654696 | -1.8566874359 | -2.5446004472 |
| 64 | H | -0.9195193072 | -0.9460660114 | -0.0618650543 |
| 65 | H | 3.7298501135  | -0.0368306446 | -0.1119235739 |
| 66 | H | 0.4463736963  | 2.4169607511  | 1.1530386000  |
| 67 | H | 4.2350441892  | 2.7466365898  | 3.1349549177  |
| 68 | H | 0.1355149249  | 0.8902409832  | -0.3076476210 |
| 69 | H | -0.3166814950 | -2.8860318241 | -2.1255826729 |

---

Q-TU\_iv

E = -2412.82611248451

---

---

|    |   |               |               |               |
|----|---|---------------|---------------|---------------|
| 1  | C | -5.2407870436 | 1.7172668207  | 3.1024198103  |
| 2  | O | -6.0136766335 | 2.2475179311  | 2.0365876126  |
| 3  | C | -6.3034155855 | 2.7647568767  | -0.2233790175 |
| 4  | C | -4.2133953495 | 1.7658845587  | 0.4956370324  |
| 5  | C | -3.7341512129 | 1.7969528312  | -0.8440882253 |
| 6  | C | -5.8606552357 | 2.8167766801  | -1.5108218005 |
| 7  | C | -4.5662093295 | 2.3430108039  | -1.8621965634 |
| 8  | C | -2.4441694251 | 1.3278795530  | -1.2400491292 |
| 9  | C | -2.0847855989 | 1.4594399454  | -2.5615737925 |
| 10 | C | -2.9871715948 | 2.0176070197  | -3.4852966654 |
| 11 | N | -4.1909974889 | 2.4434343837  | -3.1665354814 |
| 12 | C | -1.4818202255 | 0.6569103891  | -0.2704197711 |
| 13 | C | -1.5427672680 | -0.8785303110 | -0.4753988789 |
| 14 | C | -2.8847522081 | -1.5235616167 | -0.0548081758 |
| 15 | C | -2.5613527791 | -2.8593752196 | 0.6365557083  |
| 16 | C | -1.6189301401 | -3.6646047693 | -0.2815236936 |
| 17 | C | -0.2636437901 | -2.8837700016 | -0.3386907176 |
| 18 | C | -1.3962136340 | -5.1075188363 | 0.0823309891  |
| 19 | C | -2.0310270141 | -5.8175284093 | 1.0107139723  |
| 20 | N | -0.4118539089 | -1.5314814243 | 0.2013824308  |
| 21 | N | -0.0872765674 | 1.0332097021  | -0.4872536915 |
| 22 | C | 0.5389360795  | 2.1435125880  | -0.0103900112 |
| 23 | N | 1.7999435968  | 2.2558845052  | 0.2191684715  |
| 24 | C | 2.6109384428  | 1.1143154432  | 0.1608407361  |
| 25 | C | 3.5509891021  | 0.9701502554  | -0.8619611965 |
| 26 | C | 4.3868484038  | -0.1426740137 | -0.8966603788 |
| 27 | C | 4.3110087153  | -1.1254252596 | 0.0813327286  |
| 28 | C | 2.5376749895  | 0.1240071993  | 1.1514424388  |
| 29 | C | 3.3791564486  | -0.9782823125 | 1.1047335231  |
| 30 | C | 5.4248980268  | -0.2448486410 | -1.9809616719 |
| 31 | C | 3.2748570186  | -2.0630368465 | 2.1412209993  |
| 32 | F | 5.8210727056  | -1.5127126681 | -2.1829337141 |
| 33 | F | 6.5271765103  | 0.4671872180  | -1.6775954262 |
| 34 | F | 4.9697842505  | 0.2253702217  | -3.1545860233 |
| 35 | F | 2.5631040288  | -1.6819454383 | 3.2142910280  |
| 36 | F | 4.4873293075  | -2.4472450421 | 2.5802944542  |
| 37 | F | 2.6808250201  | -3.1682110566 | 1.6488100831  |
| 38 | S | -0.4036923066 | 3.6170464106  | 0.3454713077  |
| 39 | H | -5.0087812129 | 0.6586037643  | 2.9365175961  |
| 40 | H | -5.8582405614 | 1.8107611436  | 3.9957233553  |
| 41 | H | -4.3140734735 | 2.2848324189  | 3.2451710203  |
| 42 | C | -5.4691993365 | 2.2363422037  | 0.7988965321  |
| 43 | H | -7.2885813579 | 3.1257208519  | 0.0518604841  |
| 44 | H | -6.4778304012 | 3.2223146237  | -2.3054837775 |
| 45 | H | -3.5821070416 | 1.3750188719  | 1.2811745789  |
| 46 | H | -2.7000753173 | 2.1136037547  | -4.5299503675 |
| 47 | H | -1.1009567291 | 1.1424254424  | -2.8929169734 |
| 48 | H | -1.7872137367 | -6.8621781158 | 1.1815985907  |
| 49 | H | -2.8186983610 | -5.4025624835 | 1.6338578396  |
| 50 | H | -0.6198424870 | -5.6039553022 | -0.5022199912 |
| 51 | C | -1.8527544255 | -2.5437933349 | 1.9637868337  |
| 52 | C | -0.6497605403 | -1.6176973499 | 1.6484741084  |

---

|    |   |               |               |               |
|----|---|---------------|---------------|---------------|
| 53 | H | -2.0540185859 | -3.6589112718 | -1.2918609998 |
| 54 | H | 0.5050572489  | -3.3889631739 | 0.2536302331  |
| 55 | H | 0.1089465856  | -2.8168945784 | -1.3658370647 |
| 56 | H | -3.4880161002 | -3.4130405422 | 0.8153346534  |
| 57 | H | -1.5137078208 | -3.4668842831 | 2.4439263262  |
| 58 | H | -2.5503389770 | -2.0579453522 | 2.6544595395  |
| 59 | H | 0.2665075576  | -1.9842460594 | 2.1164100338  |
| 60 | H | -0.8120033299 | -0.6049521338 | 2.0317025862  |
| 61 | H | -3.4376554514 | -0.8826056854 | 0.6407179793  |
| 62 | H | -3.5295907753 | -1.6711882393 | -0.9262913231 |
| 63 | H | -1.3790079269 | -1.0462753791 | -1.5468468232 |
| 64 | H | -1.7649167230 | 0.8970416877  | 0.7590113424  |
| 65 | H | 3.6142117192  | 1.7350254875  | -1.6280710799 |
| 66 | H | 1.8203598785  | 0.2330410309  | 1.9568463011  |
| 67 | H | 4.9660746595  | -1.9878809983 | 0.0507309531  |
| 68 | H | -1.5010426770 | 3.2920527348  | -0.3562686597 |
| 69 | H | 0.4922873937  | 0.1905207967  | -0.4518431278 |

DQ-TU<sub>i</sub>

E = -2411.59906088590

|    |   |               |               |               |
|----|---|---------------|---------------|---------------|
| 1  | C | -8.7123459248 | 3.0856011623  | -2.8020087155 |
| 2  | O | -9.2352651831 | 2.2893506840  | -1.7512589804 |
| 3  | C | -9.0164901905 | 1.2305392826  | 0.3205046544  |
| 4  | C | -7.1077941458 | 2.4060836389  | -0.6026866294 |
| 5  | C | -6.3346255691 | 2.0564482922  | 0.5392192959  |
| 6  | C | -8.2906592074 | 0.8705901988  | 1.4163824536  |
| 7  | C | -6.9326338108 | 1.2669360941  | 1.5606247983  |
| 8  | C | -4.9765314119 | 2.4506353175  | 0.7298991217  |
| 9  | C | -4.3385804018 | 2.0260070172  | 1.8707570615  |
| 10 | C | -5.0199032714 | 1.2343351117  | 2.8123191975  |
| 11 | N | -6.2750298822 | 0.8621076981  | 2.6825636348  |
| 12 | C | -4.2555866674 | 3.3965409731  | -0.2166735523 |
| 13 | C | -4.2275310088 | 4.8150966145  | 0.4069917143  |
| 14 | C | -5.6132392146 | 5.4964406021  | 0.4846117805  |
| 15 | C | -5.4344324544 | 6.9672870529  | 0.0811458926  |
| 16 | C | -4.2922024631 | 7.5725787714  | 0.9418177777  |
| 17 | C | -2.9675235477 | 6.8309297282  | 0.5421448510  |
| 18 | C | -4.1813966867 | 9.0215504028  | 0.7845213112  |
| 19 | C | -4.0813657334 | 10.2131072395 | 0.6298693610  |
| 20 | N | -3.2562176478 | 5.6696966968  | -0.2941625689 |
| 21 | N | -2.8651193515 | 3.0429338887  | -0.4301370499 |
| 22 | C | -2.4229171968 | 2.0207377148  | -1.1808002135 |
| 23 | N | -1.0692131263 | 1.9808826307  | -1.3727481404 |
| 24 | C | -0.0980986594 | 2.8686220218  | -0.8635634187 |
| 25 | C | -0.0897101948 | 3.2557421025  | 0.4780411014  |
| 26 | C | 0.8786994122  | 4.1396828391  | 0.9370864697  |
| 27 | C | 1.8741951947  | 4.6157933338  | 0.0928369152  |
| 28 | C | 0.8978286835  | 3.3428689496  | -1.7176848491 |
| 29 | C | 1.8809213862  | 4.1979180192  | -1.2322774117 |
| 30 | C | 0.8283271658  | 4.5521185243  | 2.3835872840  |
| 31 | C | 2.9483446342  | 4.6714936078  | -2.1821646584 |
| 32 | F | 1.8159236240  | 5.4009259906  | 2.7070932532  |
| 33 | F | 0.9264715751  | 3.4873447088  | 3.1999232446  |

|    |   |                |               |               |
|----|---|----------------|---------------|---------------|
| 34 | F | -0.3350979014  | 5.1587836493  | 2.6817689006  |
| 35 | F | 3.6942343573   | 3.6444173587  | -2.6275323342 |
| 36 | F | 3.7831948151   | 5.5544985513  | -1.6114984555 |
| 37 | F | 2.4162846595   | 5.2628355841  | -3.2654599196 |
| 38 | S | -3.4207339395  | 0.8364209725  | -1.8655979630 |
| 39 | H | -8.3985744130  | 4.0709475478  | -2.4374546131 |
| 40 | H | -9.5266983407  | 3.2124709791  | -3.5157903073 |
| 41 | H | -7.8714383350  | 2.5899117664  | -3.3011933011 |
| 42 | C | -8.4184296632  | 2.0060224320  | -0.7088152090 |
| 43 | H | -10.0528878768 | 0.9320980834  | 0.2049397851  |
| 44 | H | -8.7246856399  | 0.2738270106  | 2.2116323511  |
| 45 | H | -6.6494024915  | 2.9687262321  | -1.4038783632 |
| 46 | H | -4.5066848715  | 0.9019653106  | 3.7123598238  |
| 47 | H | -3.3036194917  | 2.2968197313  | 2.0532608084  |
| 48 | H | -3.9967666517  | 11.2708626563 | 0.5086182873  |
| 49 | C | -5.0367490392  | 7.0192264050  | -1.3996878651 |
| 50 | C | -3.7841951927  | 6.1231006585  | -1.5896603585 |
| 51 | H | -4.5171854960  | 7.3669732878  | 1.9958660359  |
| 52 | H | -2.3116950305  | 7.5012554807  | -0.0197730735 |
| 53 | H | -2.4222372584  | 6.5046924607  | 1.4316830298  |
| 54 | H | -6.3587202591  | 7.5245200678  | 0.2525694274  |
| 55 | H | -4.8341346715  | 8.0533897384  | -1.6976259952 |
| 56 | H | -5.8685526019  | 6.6631712983  | -2.0161211302 |
| 57 | H | -2.9823384775  | 6.6602267599  | -2.1041092635 |
| 58 | H | -4.0089042942  | 5.2409927867  | -2.1966789554 |
| 59 | H | -6.3295362366  | 5.0242352317  | -0.1959387201 |
| 60 | H | -6.0309174397  | 5.4050681546  | 1.4914249621  |
| 61 | H | -3.8258334694  | 4.6934968452  | 1.4203864757  |
| 62 | H | -4.7674329617  | 3.4164133071  | -1.1834217919 |
| 63 | H | -2.2829279792  | 3.8841895444  | -0.3800792716 |
| 64 | H | -0.7543018495  | 1.3090555695  | -2.0621422436 |
| 65 | H | -0.8376714902  | 2.8671364201  | 1.1592621360  |
| 66 | H | 0.8921379199   | 3.0492843767  | -2.7627465729 |
| 67 | H | 2.6300828872   | 5.2977968311  | 0.4590586989  |

## DQ-TU\_ii

E = -2411.58672334335

|    |   |               |               |               |
|----|---|---------------|---------------|---------------|
| 1  | C | -6.6506206426 | 1.5234210319  | 1.9293884206  |
| 2  | O | -6.7839813192 | 2.3945674438  | 0.8169603389  |
| 3  | C | -5.9164973930 | 3.4172309770  | -1.0970588968 |
| 4  | C | -4.4988789000 | 1.9206295881  | 0.1799242580  |
| 5  | C | -3.4313451700 | 2.1376071878  | -0.7367342699 |
| 6  | C | -4.9081975596 | 3.6459051751  | -1.9846406670 |
| 7  | C | -3.6405683167 | 3.0183745169  | -1.8350961854 |
| 8  | C | -2.1491346390 | 1.5180734463  | -0.6309284131 |
| 9  | C | -1.2071899102 | 1.8185004074  | -1.5887591648 |
| 10 | C | -1.5188984997 | 2.7105916486  | -2.6298254172 |
| 11 | N | -2.6876358712 | 3.2993487530  | -2.7662719384 |
| 12 | C | -1.7887889587 | 0.5538094751  | 0.4991215931  |
| 13 | C | -1.5865991589 | -0.8502546967 | -0.1030696367 |
| 14 | C | -2.9153214105 | -1.5344064018 | -0.4946770815 |
| 15 | C | -3.1222971740 | -2.7776498004 | 0.3814944827  |
| 16 | C | -2.0046992621 | -3.7970850275 | 0.0392883066  |

---

|    |   |               |               |               |
|----|---|---------------|---------------|---------------|
| 17 | C | -0.6364684081 | -3.0800542930 | 0.2088430439  |
| 18 | C | -2.0910688761 | -5.0080423110 | 0.8591758198  |
| 19 | C | -2.1571574951 | -5.9887844875 | 1.5555692301  |
| 20 | N | -0.8615689238 | -1.7512669607 | 0.8518164052  |
| 21 | N | -0.7171839795 | 1.0669230152  | 1.3666227426  |
| 22 | C | 0.6463897772  | 1.1347829735  | 1.1095168829  |
| 23 | N | 1.1077203001  | 0.1380980557  | 0.3827075381  |
| 24 | C | 2.4382940375  | -0.0782110549 | 0.0601869459  |
| 25 | C | 2.7103578094  | -0.5959173524 | -1.2120548555 |
| 26 | C | 4.0012054325  | -0.9492079752 | -1.5901552800 |
| 27 | C | 5.0622422493  | -0.8110556916 | -0.7068548148 |
| 28 | C | 3.5168171529  | 0.0590609456  | 0.9511054034  |
| 29 | C | 4.7988269699  | -0.3079453079 | 0.5652193381  |
| 30 | C | 4.2154920766  | -1.4910727693 | -2.9752235297 |
| 31 | C | 5.9399234294  | -0.1215323873 | 1.5260775846  |
| 32 | F | 5.4911533301  | -1.8573963117 | -3.1917605788 |
| 33 | F | 3.8997934168  | -0.5821446236 | -3.9190652441 |
| 34 | F | 3.4473791057  | -2.5682469522 | -3.2141475088 |
| 35 | F | 6.5294106401  | 1.0825028981  | 1.3782063312  |
| 36 | F | 6.9035824715  | -1.0438601829 | 1.3442043450  |
| 37 | F | 5.5462340177  | -0.2070290728 | 2.8075220356  |
| 38 | S | 1.4876583827  | 2.4818463305  | 1.8012459380  |
| 39 | H | -7.6160254448 | 1.5334924434  | 2.4352988330  |
| 40 | H | -5.8794519489 | 1.8775383924  | 2.6233501415  |
| 41 | H | -6.4260881264 | 0.4995806090  | 1.6079442223  |
| 42 | C | -5.7124133268 | 2.5420109979  | 0.0033712771  |
| 43 | H | -6.8855716538 | 3.8922980492  | -1.2065489893 |
| 44 | H | -5.0387900704 | 4.3108702748  | -2.8319739331 |
| 45 | H | -4.3550981131 | 1.2683307832  | 1.0298097027  |
| 46 | H | -0.7676832756 | 2.9449412389  | -3.3806813126 |
| 47 | H | -0.2134954159 | 1.3840512003  | -1.5416382346 |
| 48 | H | -2.2113682043 | -6.8664545115 | 2.1618732671  |
| 49 | C | -3.0194151712 | -2.3762795735 | 1.8589611888  |
| 50 | C | -1.5777153980 | -1.9252401744 | 2.1556953116  |
| 51 | H | -2.1143644530 | -4.0901226733 | -1.0096391747 |
| 52 | H | 0.0488854165  | -3.6400170318 | 0.8445908291  |
| 53 | H | -0.1494821000 | -2.8964464571 | -0.7492617763 |
| 54 | H | -4.0967921938 | -3.2244544587 | 0.1752827653  |
| 55 | H | -3.2858226914 | -3.2151551667 | 2.5050336442  |
| 56 | H | -3.7276264421 | -1.5682901204 | 2.0652512877  |
| 57 | H | -1.0178797405 | -2.6764513243 | 2.7146591571  |
| 58 | H | -1.5128585166 | -0.9795202654 | 2.6918179567  |
| 59 | H | -3.7511859648 | -0.8420892090 | -0.3598519758 |
| 60 | H | -2.9007076619 | -1.8058509487 | -1.5533913408 |
| 61 | H | -0.9126660098 | -0.7686030229 | -0.9544994398 |
| 62 | H | -2.6401089028 | 0.4800825858  | 1.1768127544  |
| 63 | H | 1.8866951066  | -0.7184134638 | -1.9091018594 |
| 64 | H | 3.3392005453  | 0.4531558596  | 1.9429225939  |
| 65 | H | 6.0656928710  | -1.0999214224 | -0.9922180252 |
| 66 | H | 0.0602587606  | -1.2754386488 | 0.9623406547  |
| 67 | H | -1.0393906057 | 1.8536458292  | 1.9131969727  |

---

| E = -2411.57319198321 |   |               |               |               |
|-----------------------|---|---------------|---------------|---------------|
| 1                     | C | -2.0079619972 | 2.7935082010  | 4.3425449354  |
| 2                     | O | -1.8830018506 | 1.7950237529  | 3.3439984551  |
| 3                     | C | -2.9084730116 | 3.3040864818  | 1.7176348481  |
| 4                     | C | -1.9933944309 | 1.1427207905  | 1.1197273487  |
| 5                     | C | -2.3140990796 | 1.3617067620  | -0.2421886898 |
| 6                     | C | -3.2513255516 | 3.5249534301  | 0.4099044479  |
| 7                     | C | -2.9630719651 | 2.5794312874  | -0.6029892131 |
| 8                     | C | -1.9721942510 | 0.4602494079  | -1.3020893315 |
| 9                     | C | -2.3033563372 | 0.8261760658  | -2.5837890392 |
| 10                    | C | -2.9835168014 | 2.0371475893  | -2.8244631680 |
| 11                    | N | -3.3059107400 | 2.8968300113  | -1.8848218898 |
| 12                    | C | -1.2059162830 | -0.8407083367 | -1.0732068165 |
| 13                    | C | -2.1175473594 | -2.0254425711 | -1.4399814664 |
| 14                    | C | -3.2787242414 | -2.3189340993 | -0.4797002585 |
| 15                    | C | -3.3984267302 | -3.8421897301 | -0.3139897331 |
| 16                    | C | -3.3942204979 | -4.4849555317 | -1.7283381974 |
| 17                    | C | -1.9757674397 | -4.2993412363 | -2.3376190849 |
| 18                    | C | -3.7712924372 | -5.8977610171 | -1.7005490794 |
| 19                    | C | -4.0612982649 | -7.0658524024 | -1.6568336869 |
| 20                    | N | -1.2650851935 | -3.2591585602 | -1.5382512568 |
| 21                    | N | -0.0083274722 | -0.9788684175 | -1.8937375995 |
| 22                    | C | 1.1055424777  | -0.3992340436 | -1.5340798707 |
| 23                    | N | 1.0446335986  | 0.5221306803  | -0.4750813841 |
| 24                    | C | 1.9755650265  | 1.0818967288  | 0.3909290212  |
| 25                    | C | 3.2993010088  | 0.6584692132  | 0.5486626651  |
| 26                    | C | 4.1035206581  | 1.2589063131  | 1.5130946489  |
| 27                    | C | 3.6345887326  | 2.2696493923  | 2.3421742353  |
| 28                    | C | 1.5013581232  | 2.1096289155  | 1.2224589785  |
| 29                    | C | 2.3159312958  | 2.6831791785  | 2.1835824856  |
| 30                    | C | 5.5414653362  | 0.8288515190  | 1.6205354888  |
| 31                    | C | 1.7447526951  | 3.7111851176  | 3.1203255928  |
| 32                    | F | 6.0405732330  | 1.0447093253  | 2.8507659833  |
| 33                    | F | 6.3279136824  | 1.5048801444  | 0.7602115876  |
| 34                    | F | 5.7011181301  | -0.4769305444 | 1.3503364870  |
| 35                    | F | 0.6874440365  | 4.3515073060  | 2.5900028745  |
| 36                    | F | 2.6531345510  | 4.6465911111  | 3.4521897058  |
| 37                    | F | 1.3230972533  | 3.1573200147  | 4.2717505562  |
| 38                    | S | 2.6001894464  | -0.7043041545 | -2.3563916055 |
| 39                    | H | -1.5721920282 | 2.3659411045  | 5.2453953440  |
| 40                    | H | -3.0587689532 | 3.0365859846  | 4.5376712602  |
| 41                    | H | -1.4560141947 | 3.7004239766  | 4.0761622923  |
| 42                    | C | -2.2641503441 | 2.0944743975  | 2.0806191995  |
| 43                    | H | -3.1299068356 | 4.0589426118  | 2.4625354285  |
| 44                    | H | -3.7437413403 | 4.4437084226  | 0.1093494285  |
| 45                    | H | -1.4975494237 | 0.2371502354  | 1.4489766822  |
| 46                    | H | -3.2576976723 | 2.3069535345  | -3.8421882251 |
| 47                    | H | -2.0129743021 | 0.2035237030  | -3.4242824392 |
| 48                    | H | -4.3284091630 | -8.0995743681 | -1.6276270803 |
| 49                    | C | -2.1828734623 | -4.3561148358 | 0.4676504726  |
| 50                    | C | -0.9044686254 | -3.8065514386 | -0.1908569084 |
| 51                    | H | -4.1233869167 | -3.9522687748 | -2.3491040299 |

|                       |   |               |               |               |
|-----------------------|---|---------------|---------------|---------------|
| 52                    | H | -1.3863824708 | -5.2149845966 | -2.2829277416 |
| 53                    | H | -2.0105417424 | -3.9630391738 | -3.3737119841 |
| 54                    | H | -4.3239314428 | -4.1020187676 | 0.2025948756  |
| 55                    | H | -2.1780831966 | -5.4498732282 | 0.4736250730  |
| 56                    | H | -2.2346819156 | -4.0243890988 | 1.5073163888  |
| 57                    | H | -0.1436225179 | -4.5706326504 | -0.3516544585 |
| 58                    | H | -0.4463201929 | -2.9957821675 | 0.3750376505  |
| 59                    | H | -3.0989035540 | -1.8550779959 | 0.4964544219  |
| 60                    | H | -4.2001830809 | -1.8866239843 | -0.8766365028 |
| 61                    | H | -2.4814947019 | -1.8667197808 | -2.4581205559 |
| 62                    | H | -0.9651973192 | -0.9249882989 | -0.0051798120 |
| 63                    | H | 3.6873057107  | -0.1261054545 | -0.0868463714 |
| 64                    | H | 0.4769115877  | 2.4529176710  | 1.1163075942  |
| 65                    | H | 4.2746322758  | 2.7197166245  | 3.0910139199  |
| 66                    | H | 0.1206491033  | 0.8951293027  | -0.3062535885 |
| 67                    | H | -0.4095206304 | -2.9222010496 | -2.0187893091 |
| <b>DQ-TU_iv</b>       |   |               |               |               |
| E = -2411.57071498267 |   |               |               |               |
| 1                     | C | -5.2739395851 | 1.8438054960  | 3.0714790753  |
| 2                     | O | -6.0312092185 | 2.3803126668  | 1.9975732105  |
| 3                     | C | -6.3001451991 | 2.8829237803  | -0.2682705149 |
| 4                     | C | -4.2377584947 | 1.8402575180  | 0.4683205354  |
| 5                     | C | -3.7524790121 | 1.8485597189  | -0.8695590303 |
| 6                     | C | -5.8522718642 | 2.9108641160  | -1.5546818126 |
| 7                     | C | -4.5684388694 | 2.4024726768  | -1.8964979312 |
| 8                     | C | -2.4704245258 | 1.3503737543  | -1.2550314434 |
| 9                     | C | -2.1041320482 | 1.4584277602  | -2.5768173293 |
| 10                    | C | -2.9918492570 | 2.0237535714  | -3.5103809298 |
| 11                    | N | -4.1868458184 | 2.4800863000  | -3.2005566370 |
| 12                    | C | -1.5218864071 | 0.6758416244  | -0.2737632890 |
| 13                    | C | -1.5992395513 | -0.8596948517 | -0.4681330089 |
| 14                    | C | -2.9499883800 | -1.4837173488 | -0.0423743389 |
| 15                    | C | -2.6469028380 | -2.7991448548 | 0.6922538094  |
| 16                    | C | -1.7071413616 | -3.6517281501 | -0.2024323228 |
| 17                    | C | -0.3449839033 | -2.8781468412 | -0.3103424516 |
| 18                    | C | -1.5282465679 | -5.0105956743 | 0.3052543288  |
| 19                    | C | -1.3650176091 | -6.1217801857 | 0.7438200454  |
| 20                    | N | -0.4762495448 | -1.5221660394 | 0.2135947570  |
| 21                    | N | -0.1224812189 | 1.0381173063  | -0.4834523764 |
| 22                    | C | 0.5084247449  | 2.1419270448  | 0.0031526671  |
| 23                    | N | 1.7670727862  | 2.2436632156  | 0.2482054422  |
| 24                    | C | 2.5701254803  | 1.0964005179  | 0.1979175409  |
| 25                    | C | 3.5124846970  | 0.9414808661  | -0.8209847038 |
| 26                    | C | 4.3408873880  | -0.1769746307 | -0.8477901368 |
| 27                    | C | 4.2542786844  | -1.1553337363 | 0.1337512079  |
| 28                    | C | 2.4855608470  | 0.1107304468  | 1.1919405628  |
| 29                    | C | 3.3192081291  | -0.9978208728 | 1.1526058943  |
| 30                    | C | 5.3821495326  | -0.2898618830 | -1.9278966023 |
| 31                    | C | 3.2001998623  | -2.0790231739 | 2.1910419150  |
| 32                    | F | 5.7779248569  | -1.5597973871 | -2.1172012388 |
| 33                    | F | 6.4837790241  | 0.4243407341  | -1.6271791007 |
| 34                    | F | 4.9309365904  | 0.1703316016  | -3.1070077226 |



|                       |   |               |               |               |
|-----------------------|---|---------------|---------------|---------------|
| 35                    | F | 2.4957277443  | -1.6850508510 | 3.2641625693  |
| 36                    | F | 4.4070387642  | -2.4813978561 | 2.6289590411  |
| 37                    | F | 2.5871396557  | -3.1753389301 | 1.7010645686  |
| 38                    | S | -0.4251099230 | 3.6240917559  | 0.3483949128  |
| 39                    | H | -5.0683917864 | 0.7777959437  | 2.9188833603  |
| 40                    | H | -5.8904307469 | 1.9638128306  | 3.9621341570  |
| 41                    | H | -4.3335964930 | 2.3896143676  | 3.2096812039  |
| 42                    | C | -5.4828181228 | 2.3440464126  | 0.7622209946  |
| 43                    | H | -7.2767605307 | 3.2712919422  | -0.0000847786 |
| 44                    | H | -6.4567451987 | 3.3227821574  | -2.3558434878 |
| 45                    | H | -3.6192497864 | 1.4409814053  | 1.2598246926  |
| 46                    | H | -2.6997524211 | 2.1004854710  | -4.5552956151 |
| 47                    | H | -1.1259322302 | 1.1177347780  | -2.9013899264 |
| 48                    | H | -1.2206611977 | -7.1100677402 | 1.1223211204  |
| 49                    | C | -1.9260173013 | -2.4701326685 | 2.0058686619  |
| 50                    | C | -0.7021900339 | -1.5816491354 | 1.6647324402  |
| 51                    | H | -2.1604289252 | -3.7237754239 | -1.1988429993 |
| 52                    | H | 0.4354733237  | -3.3857115382 | 0.2611637124  |
| 53                    | H | -0.0144310007 | -2.8299446305 | -1.3518141533 |
| 54                    | H | -3.5715351691 | -3.3487676887 | 0.8858030903  |
| 55                    | H | -1.6143708581 | -3.3953565260 | 2.5021004727  |
| 56                    | H | -2.6090792306 | -1.9527438306 | 2.6872588137  |
| 57                    | H | 0.2087521766  | -1.9655926651 | 2.1286439056  |
| 58                    | H | -0.8337275768 | -0.5594143600 | 2.0335235682  |
| 59                    | H | -3.5050687256 | -0.8220212882 | 0.6311199191  |
| 60                    | H | -3.5887254610 | -1.6517645848 | -0.9146173113 |
| 61                    | H | -1.4370082104 | -1.0382214739 | -1.5379236652 |
| 62                    | H | -1.8089208536 | 0.9270591889  | 0.7517627414  |
| 63                    | H | 3.5838325798  | 1.7028392228  | -1.5898779655 |
| 64                    | H | 1.7665142347  | 0.2278833209  | 1.9945725117  |
| 65                    | H | 4.9035846173  | -2.0223009351 | 0.1092938115  |
| 66                    | H | -1.5136400150 | 3.3137486133  | -0.3734973013 |
| 67                    | H | 0.4512473531  | 0.1916696297  | -0.4502411348 |
| <b>HQ-TU_anion_1</b>  |   |               |               |               |
| E = -2413.59162169682 |   |               |               |               |
| 1                     | C | -8.6608067202 | 3.1969609062  | -2.7620504370 |
| 2                     | O | -9.0701891977 | 2.2506480855  | -1.7891693839 |
| 3                     | C | -8.6861761818 | 1.0380529079  | 0.1734525812  |
| 4                     | C | -6.9456083884 | 2.5048272519  | -0.6603445039 |
| 5                     | C | -6.1084374071 | 2.1429342522  | 0.4317265989  |
| 6                     | C | -7.8985378569 | 0.6678172768  | 1.2229003879  |
| 7                     | C | -6.5911713783 | 1.2042103695  | 1.3859387000  |
| 8                     | C | -4.7980973318 | 2.6752778813  | 0.6284816249  |
| 9                     | C | -4.0880100401 | 2.2219518456  | 1.7171124752  |
| 10                    | C | -4.6574743298 | 1.2857518302  | 2.5990901485  |
| 11                    | N | -5.8661405634 | 0.7840125965  | 2.4591173886  |
| 12                    | C | -4.1762413894 | 3.7327616740  | -0.2763473655 |
| 13                    | C | -4.2576620009 | 5.1087286713  | 0.4216897764  |
| 14                    | C | -5.6871602118 | 5.5097371491  | 0.8857512912  |
| 15                    | C | -5.8433327728 | 7.0257354989  | 0.6697197353  |
| 16                    | C | -4.6184744569 | 7.7048592382  | 1.3252455556  |
| 17                    | C | -3.3891686193 | 7.3250316791  | 0.4560152479  |

---

|    |   |               |               |               |
|----|---|---------------|---------------|---------------|
| 18 | C | -4.7206168690 | 9.2047679091  | 1.6426386712  |
| 19 | C | -5.0529103357 | 10.1612828080 | 0.4976968026  |
| 20 | N | -3.6688529364 | 6.1719837688  | -0.4082484782 |
| 21 | N | -2.7898554572 | 3.4292143113  | -0.5333048872 |
| 22 | C | -2.4488290654 | 2.9315220591  | -1.6714661935 |
| 23 | N | -1.0740696947 | 2.7250476653  | -1.8816575606 |
| 24 | C | 0.0287132470  | 3.1428582273  | -1.1594065212 |
| 25 | C | -0.0188582533 | 3.9871977894  | -0.0397689982 |
| 26 | C | 1.1592693361  | 4.3684645262  | 0.5938227557  |
| 27 | C | 2.4048124117  | 3.9395424162  | 0.1570655148  |
| 28 | C | 1.2920046637  | 2.7103994425  | -1.6049868321 |
| 29 | C | 2.4507251771  | 3.1061400932  | -0.9579824382 |
| 30 | C | 1.0501530723  | 5.2429516072  | 1.8137669783  |
| 31 | C | 3.7813142703  | 2.5808596934  | -1.4221024035 |
| 32 | F | 2.2347397670  | 5.7646950024  | 2.1750519195  |
| 33 | F | 0.5852514030  | 4.5592122775  | 2.8766766925  |
| 34 | F | 0.2074041919  | 6.2745872023  | 1.6241886326  |
| 35 | F | 4.1526686759  | 1.4845748861  | -0.7330036457 |
| 36 | F | 4.7610554372  | 3.4871628773  | -1.2568226668 |
| 37 | F | 3.7723994915  | 2.2371680637  | -2.7210230319 |
| 38 | S | -3.4385858057 | 2.4389768512  | -3.0323506477 |
| 39 | H | -8.4654063724 | 4.1758020455  | -2.3069512836 |
| 40 | H | -9.4930952736 | 3.2851275599  | -3.4610754073 |
| 41 | H | -7.7663879372 | 2.8618731764  | -3.3007289098 |
| 42 | C | -8.2038595562 | 1.9676911646  | -0.7867537969 |
| 43 | H | -9.6843375859 | 0.6331221139  | 0.0432485914  |
| 44 | H | -8.2425979064 | -0.0439508386 | 1.9663504559  |
| 45 | H | -6.5626177234 | 3.1860082617  | -1.4074442484 |
| 46 | H | -4.0853785497 | 0.9397913374  | 3.4579813637  |
| 47 | H | -3.0760459216 | 2.5778716245  | 1.8813646082  |
| 48 | H | -6.0859052888 | 10.0428303306 | 0.1554703153  |
| 49 | H | -4.3932246247 | 10.0234044707 | -0.3667487937 |
| 50 | H | -4.9397389347 | 11.1987226033 | 0.8304401511  |
| 51 | H | -3.7615919029 | 9.5071412591  | 2.0857041186  |
| 52 | H | -5.4704627895 | 9.3379758218  | 2.4333369834  |
| 53 | C | -5.8807836044 | 7.2419403033  | -0.8540288059 |
| 54 | C | -4.6039600428 | 6.5951033709  | -1.4544526888 |
| 55 | H | -4.4909848322 | 7.2151943403  | 2.3018159639  |
| 56 | H | -3.0945939079 | 8.1580841034  | -0.1955278737 |
| 57 | H | -2.5196732623 | 7.0913629306  | 1.0815511668  |
| 58 | H | -6.7719418034 | 7.3835927392  | 1.1293071636  |
| 59 | H | -5.9379976416 | 8.3019741971  | -1.1099145545 |
| 60 | H | -6.7823731358 | 6.7692175616  | -1.2616505122 |
| 61 | H | -4.0739178727 | 7.2975864877  | -2.1073631285 |
| 62 | H | -4.8435055411 | 5.7253633139  | -2.0751451290 |
| 63 | H | -6.4536246685 | 4.9755465986  | 0.3105467476  |
| 64 | H | -5.8365442669 | 5.2364924971  | 1.9360933997  |
| 65 | H | -3.6060192679 | 5.0294667958  | 1.3034104481  |
| 66 | H | -4.7381149614 | 3.7725968076  | -1.2168735660 |
| 67 | H | -0.8722969515 | 2.2461747301  | -2.7482313275 |
| 68 | H | -0.9832433593 | 4.3352394204  | 0.3026513084  |
| 69 | H | 1.3543594774  | 2.0620383558  | -2.4736804843 |

---

|                       |   |                |              |               |
|-----------------------|---|----------------|--------------|---------------|
| 70                    | H | 3.3124491286   | 4.2504269239 | 0.6581322407  |
| <b>HQ-TU_anion_2</b>  |   |                |              |               |
| E = -2413.58689071442 |   |                |              |               |
| 1                     | C | -8.6553627649  | 3.1391067314 | -2.8510860638 |
| 2                     | O | -9.2249043402  | 2.3857249214 | -1.7942193464 |
| 3                     | C | -9.0773533067  | 1.3707539009 | 0.3065819349  |
| 4                     | C | -7.1177685540  | 2.4671112795 | -0.6058221179 |
| 5                     | C | -6.3737957939  | 2.1213935772 | 0.5562608588  |
| 6                     | C | -8.3800629857  | 1.0124948134 | 1.4216907691  |
| 7                     | C | -7.0129050769  | 1.3695630639 | 1.5809754146  |
| 8                     | C | -5.0078408651  | 2.4836866942 | 0.7592996761  |
| 9                     | C | -4.4049112181  | 2.0595215036 | 1.9198741481  |
| 10                    | C | -5.1246081259  | 1.3050982407 | 2.8624672935  |
| 11                    | N | -6.3874817548  | 0.9650800631 | 2.7215492728  |
| 12                    | C | -4.2427907022  | 3.4062301237 | -0.1779479997 |
| 13                    | C | -4.2389259283  | 4.8294442200 | 0.4411673196  |
| 14                    | C | -5.6337516741  | 5.4966808296 | 0.5446429062  |
| 15                    | C | -5.4424582706  | 6.9975719372 | 0.2551058100  |
| 16                    | C | -4.2860132967  | 7.4913056830 | 1.1571872000  |
| 17                    | C | -2.9856357057  | 6.8532052469 | 0.6012821190  |
| 18                    | C | -4.1795883582  | 9.0031266535 | 1.4095211533  |
| 19                    | C | -4.0771338687  | 9.9291520876 | 0.1979190407  |
| 20                    | N | -3.2877683839  | 5.7048463729 | -0.2647829771 |
| 21                    | N | -2.8476282105  | 3.0478502773 | -0.3314853583 |
| 22                    | C | -2.3441727684  | 2.0587367629 | -1.1528834828 |
| 23                    | N | -1.0616233230  | 2.0630332542 | -1.4636937083 |
| 24                    | C | -0.1620407118  | 2.9548329001 | -0.9096763377 |
| 25                    | C | -0.0838731411  | 3.3126570489 | 0.4521056120  |
| 26                    | C | 0.8800436944   | 4.2036988328 | 0.9125678567  |
| 27                    | C | 1.8242344801   | 4.7568134208 | 0.0593058651  |
| 28                    | C | 0.8225513070   | 3.5066058139 | -1.7586191381 |
| 29                    | C | 1.7838183341   | 4.3845783926 | -1.2842234533 |
| 30                    | C | 0.8613835202   | 4.5668977583 | 2.3713159519  |
| 31                    | C | 2.8373402265   | 4.9121398382 | -2.2184075206 |
| 32                    | F | 1.7811746452   | 5.4933120384 | 2.6848234957  |
| 33                    | F | 1.0952087855   | 3.4982590461 | 3.1579731870  |
| 34                    | F | -0.3356560535  | 5.0573559128 | 2.7494350853  |
| 35                    | F | 3.9400614675   | 4.1364626456 | -2.2186674308 |
| 36                    | F | 3.2413982823   | 6.1481192130 | -1.8743865889 |
| 37                    | F | 2.4109184953   | 4.9750855654 | -3.4913745334 |
| 38                    | S | -3.4210006600  | 0.8541283260 | -1.7776300047 |
| 39                    | H | -8.3207525642  | 4.1238883637 | -2.5030216584 |
| 40                    | H | -9.4496973509  | 3.2698246510 | -3.5867189193 |
| 41                    | H | -7.8149471434  | 2.6099339403 | -3.3160163790 |
| 42                    | C | -8.4370887854  | 2.1030373533 | -0.7283462399 |
| 43                    | H | -10.1205748377 | 1.1015330486 | 0.1787391524  |
| 44                    | H | -8.8436087999  | 0.4454225209 | 2.2224062039  |
| 45                    | H | -6.6207246063  | 2.9922289988 | -1.4091012955 |
| 46                    | H | -4.6321216485  | 0.9745824710 | 3.7750208493  |
| 47                    | H | -3.3620788517  | 2.2988623110 | 2.1020618311  |
| 48                    | H | -5.0134746832  | 9.9660594264 | -0.3679231380 |
| 49                    | H | -3.2777685454  | 9.6311202183 | -0.4903411816 |

|    |   |               |               |               |
|----|---|---------------|---------------|---------------|
| 50 | H | -3.8575494613 | 10.9515111423 | 0.5240913984  |
| 51 | H | -3.3013138747 | 9.1639832572  | 2.0497911028  |
| 52 | H | -5.0460494368 | 9.3115556966  | 2.0088331994  |
| 53 | C | -5.0961355793 | 7.1106332522  | -1.2409385101 |
| 54 | C | -3.8727760434 | 6.1978318423  | -1.5173042700 |
| 55 | H | -4.4667311826 | 7.0498847229  | 2.1477111726  |
| 56 | H | -2.4126565941 | 7.5705563743  | 0.0014407927  |
| 57 | H | -2.3269096576 | 6.5180892474  | 1.4095575904  |
| 58 | H | -6.3631725867 | 7.5485143836  | 0.4772953699  |
| 59 | H | -4.8809270434 | 8.1422471816  | -1.5261355217 |
| 60 | H | -5.9586608133 | 6.7909506773  | -1.8370043872 |
| 61 | H | -3.0884260836 | 6.7315561455  | -2.0633693277 |
| 62 | H | -4.1419620769 | 5.3323411316  | -2.1315313783 |
| 63 | H | -6.3352332626 | 5.0642312988  | -0.1784896962 |
| 64 | H | -6.0615919552 | 5.3286555759  | 1.5381460288  |
| 65 | H | -3.8239290946 | 4.7088764568  | 1.4502986644  |
| 66 | H | -4.7337917219 | 3.4198994026  | -1.1579237390 |
| 67 | H | -2.2917647779 | 3.9018763429  | -0.3090146535 |
| 68 | H | -0.8040549125 | 2.9003105831  | 1.1501515528  |
| 69 | H | 0.7910128145  | 3.2297260103  | -2.8068440589 |
| 70 | H | 2.5626467651  | 5.4599319803  | 0.4221775369  |

---

**HQ-TU\_anion\_3**


---

E = -2413.55324498076

|    |   |               |               |               |
|----|---|---------------|---------------|---------------|
| 1  | C | -7.1451777305 | 2.6507145863  | 2.2678783842  |
| 2  | O | -5.8739618442 | 2.0740936846  | 2.0072736014  |
| 3  | C | -5.8738654378 | 3.1387142475  | -0.1920315581 |
| 4  | C | -4.0661493541 | 1.7276499145  | 0.5868606920  |
| 5  | C | -3.3654090483 | 1.9182129597  | -0.6287413371 |
| 6  | C | -5.2128634336 | 3.3391980394  | -1.3751781919 |
| 7  | C | -3.9534382048 | 2.7466181720  | -1.6302294641 |
| 8  | C | -2.0862718344 | 1.3414755597  | -0.9154602799 |
| 9  | C | -1.5174658115 | 1.6356067859  | -2.1309386744 |
| 10 | C | -2.1911259838 | 2.4596559950  | -3.0552417985 |
| 11 | N | -3.3650269350 | 3.0052453902  | -2.8339590702 |
| 12 | C | -1.3297542952 | 0.4275945305  | 0.0458902503  |
| 13 | C | -1.4616293060 | -1.0387093130 | -0.4308800525 |
| 14 | C | -2.9301802980 | -1.5346238760 | -0.5599992898 |
| 15 | C | -2.9711244158 | -3.0026899175 | -0.0980193652 |
| 16 | C | -1.8564655893 | -3.7470488840 | -0.8683335021 |
| 17 | C | -0.5076941717 | -3.2187231327 | -0.3122289550 |
| 18 | C | -1.9434984469 | -5.2790583874 | -0.9433332652 |
| 19 | C | -1.9982429366 | -6.0621286630 | 0.3680692136  |
| 20 | N | -0.6797198149 | -1.9539418878 | 0.4132782610  |
| 21 | N | 0.0713829547  | 0.7528074950  | 0.0970741968  |
| 22 | C | 0.5975489796  | 1.5381338346  | 0.9718574695  |
| 23 | N | 1.8887099318  | 1.7473477336  | 1.2293234653  |
| 24 | C | 2.8356891003  | 0.8289458604  | 0.8384268275  |
| 25 | C | 2.6232201948  | -0.5254102480 | 0.4826356181  |
| 26 | C | 3.6968617323  | -1.3610434244 | 0.1942940893  |
| 27 | C | 5.0133680510  | -0.9143821872 | 0.2160965172  |
| 28 | C | 4.1811943544  | 1.2626587353  | 0.8692835807  |
| 29 | C | 5.2350851123  | 0.4174055668  | 0.5610195881  |

---

|                       |   |               |               |               |
|-----------------------|---|---------------|---------------|---------------|
| 30                    | C | 3.3975520246  | -2.7851734600 | -0.1850681266 |
| 31                    | C | 6.6463576962  | 0.9205350118  | 0.6678314016  |
| 32                    | F | 4.5071645347  | -3.5439517042 | -0.2554076310 |
| 33                    | F | 2.7967011949  | -2.8772099399 | -1.3900659433 |
| 34                    | F | 2.5749609513  | -3.3840518169 | 0.6953321302  |
| 35                    | F | 6.7447390382  | 2.2379978937  | 0.4145183009  |
| 36                    | F | 7.4735413607  | 0.2927254603  | -0.1889070096 |
| 37                    | F | 7.1614855236  | 0.7292627956  | 1.8995623172  |
| 38                    | S | -0.3755369964 | 2.6285387883  | 2.1055174188  |
| 39                    | H | -7.9004190008 | 2.3003017592  | 1.5553363646  |
| 40                    | H | -7.1012745640 | 3.7457323439  | 2.2590189563  |
| 41                    | H | -7.4199361187 | 2.3162096912  | 3.2687034171  |
| 42                    | C | -5.2909210739 | 2.3205612629  | 0.8082708654  |
| 43                    | H | -6.8353948689 | 3.6119183272  | -0.0328169369 |
| 44                    | H | -5.6365762524 | 3.9634699554  | -2.1552320557 |
| 45                    | H | -3.6567353635 | 1.1082257184  | 1.3767304057  |
| 46                    | H | -1.7278615952 | 2.6752387543  | -4.0161342897 |
| 47                    | H | -0.5307335215 | 1.2491802780  | -2.3651427924 |
| 48                    | H | -2.9498427547 | -5.9170215093 | 0.8893564227  |
| 49                    | H | -1.1906047012 | -5.7831041985 | 1.0545258228  |
| 50                    | H | -1.8990576236 | -7.1348043747 | 0.1696108742  |
| 51                    | H | -1.0740425666 | -5.6228318241 | -1.5209537641 |
| 52                    | H | -2.8244650438 | -5.5446330872 | -1.5423817974 |
| 53                    | C | -2.7150580165 | -2.9880120515 | 1.4202987998  |
| 54                    | C | -1.3804833004 | -2.2352263874 | 1.6687560894  |
| 55                    | H | -1.9350144569 | -3.4075018445 | -1.9116552699 |
| 56                    | H | -0.0542154274 | -3.9334124995 | 0.3843331699  |
| 57                    | H | 0.2219687257  | -3.0663285309 | -1.1142931302 |
| 58                    | H | -3.9502095860 | -3.4447862725 | -0.3158399327 |
| 59                    | H | -2.6719309408 | -3.9994037300 | 1.8296450955  |
| 60                    | H | -3.5467281974 | -2.4785987959 | 1.9211202439  |
| 61                    | H | -0.7037528778 | -2.8216424279 | 2.2996481797  |
| 62                    | H | -1.5435347891 | -1.2884943531 | 2.1946093951  |
| 63                    | H | -3.6058993770 | -0.9348754218 | 0.0625475740  |
| 64                    | H | -3.2781743253 | -1.4302692128 | -1.5935219569 |
| 65                    | H | -0.9798348761 | -1.0681611417 | -1.4172505896 |
| 66                    | H | -1.7945192122 | 0.4967563983  | 1.0401269322  |
| 67                    | H | 1.6091498696  | -0.9117774611 | 0.4376397598  |
| 68                    | H | 4.3637835746  | 2.2968063958  | 1.1428806215  |
| 69                    | H | 5.8356502305  | -1.5739408580 | -0.0290930401 |
| 70                    | H | -1.5577638150 | 2.6040678988  | 1.4651387566  |
| <b>HQ-TU_anion_4</b>  |   |               |               |               |
| E = -2413.56789398267 |   |               |               |               |
| 1                     | C | -6.6588577328 | 1.3123333588  | 1.9870170943  |
| 2                     | O | -6.7158310102 | 2.3365633412  | 1.0079189148  |
| 3                     | C | -5.7382470011 | 3.5807922989  | -0.7127699965 |
| 4                     | C | -4.3995770966 | 1.9228266730  | 0.4427563048  |
| 5                     | C | -3.2817108757 | 2.2379754141  | -0.3804258228 |
| 6                     | C | -4.6797255915 | 3.9088003334  | -1.5060989797 |
| 7                     | C | -3.4249172139 | 3.2528456721  | -1.3685061839 |
| 8                     | C | -2.0165156259 | 1.5831005894  | -0.2826121434 |
| 9                     | C | -1.0224223290 | 1.9989343364  | -1.1398349135 |

---

|    |   |               |               |               |
|----|---|---------------|---------------|---------------|
| 10 | C | -1.2659021968 | 3.0196305558  | -2.0748107284 |
| 11 | N | -2.4207036929 | 3.6372828619  | -2.2030585580 |
| 12 | C | -1.7091356556 | 0.4659328276  | 0.7183825869  |
| 13 | C | -1.4869680898 | -0.8378989865 | -0.1106041012 |
| 14 | C | -2.8219055349 | -1.2677640732 | -0.7958141864 |
| 15 | C | -3.1233835189 | -2.7239206197 | -0.4048558807 |
| 16 | C | -1.9467809102 | -3.5748501917 | -0.9288047744 |
| 17 | C | -0.6784377662 | -3.1003042119 | -0.1682754133 |
| 18 | C | -2.1154133182 | -5.1030591504 | -0.9521694631 |
| 19 | C | -2.3976491086 | -5.8221566697 | 0.3675410473  |
| 20 | N | -0.9462007089 | -1.9436194467 | 0.7024432920  |
| 21 | N | -0.7950691471 | 1.0147355428  | 1.7213639616  |
| 22 | C | 0.4949354686  | 0.8970838145  | 1.7539736111  |
| 23 | N | 1.1184812350  | -0.0833058837 | 0.9454983679  |
| 24 | C | 2.4345691495  | -0.2836202277 | 0.5848048193  |
| 25 | C | 2.8322879671  | -1.5942302339 | 0.2849852471  |
| 26 | C | 4.1033053516  | -1.8658042105 | -0.2067830403 |
| 27 | C | 5.0261948183  | -0.8494102095 | -0.4018952385 |
| 28 | C | 3.3697155245  | 0.7480509142  | 0.3875386069  |
| 29 | C | 4.6364438198  | 0.4536042458  | -0.0942592402 |
| 30 | C | 4.4538377546  | -3.2953667357 | -0.5122760737 |
| 31 | C | 5.6397302754  | 1.5613069783  | -0.2626303150 |
| 32 | F | 5.6646344903  | -3.4167999511 | -1.0814034891 |
| 33 | F | 3.5644929114  | -3.8585603138 | -1.3499735154 |
| 34 | F | 4.4632961537  | -4.0563667025 | 0.5991054841  |
| 35 | F | 6.4657694381  | 1.3330785493  | -1.2998066284 |
| 36 | F | 6.4231968687  | 1.6996246684  | 0.8244994214  |
| 37 | F | 5.0571739028  | 2.7534592182  | -0.4767523745 |
| 38 | S | 1.4684540578  | 1.8530823454  | 2.8419270363  |
| 39 | H | -7.6537493496 | 1.2681671580  | 2.4309621422  |
| 40 | H | -5.9249562249 | 1.5427207362  | 2.7682328120  |
| 41 | H | -6.4214110067 | 0.3419700835  | 1.5346765488  |
| 42 | C | -5.5991456712 | 2.5732278184  | 0.2793181208  |
| 43 | H | -6.6983831242 | 4.0752409338  | -0.8158143783 |
| 44 | H | -4.7592918574 | 4.6761918374  | -2.2692122144 |
| 45 | H | -4.2876182247 | 1.1740602302  | 1.2144740784  |
| 46 | H | -0.4684391943 | 3.3354299606  | -2.7445161596 |
| 47 | H | -0.0355489371 | 1.5482765891  | -1.0873326833 |
| 48 | H | -2.2618288960 | -6.9019671040 | 0.2448611475  |
| 49 | H | -3.4255342892 | -5.6660722457 | 0.7076112354  |
| 50 | H | -1.7249700996 | -5.5019823385 | 1.1720046588  |
| 51 | H | -1.1935498014 | -5.5163800328 | -1.3837397701 |
| 52 | H | -2.9138639029 | -5.3506951518 | -1.6633440075 |
| 53 | C | -3.2564070449 | -2.7507120059 | 1.1302536739  |
| 54 | C | -1.8933243502 | -2.3489178436 | 1.7482566000  |
| 55 | H | -1.8253262711 | -3.2886238422 | -1.9820217320 |
| 56 | H | -0.2738717537 | -3.8952549882 | 0.4691689318  |
| 57 | H | 0.1172146683  | -2.8219749587 | -0.8689841519 |
| 58 | H | -4.0603249408 | -3.0497242481 | -0.8703107247 |
| 59 | H | -3.5772560297 | -3.7272807601 | 1.4965131256  |
| 60 | H | -4.0343404158 | -2.0352849015 | 1.4239614065  |
| 61 | H | -1.4378856746 | -3.1860514673 | 2.2868989554  |

---

|    |   |               |               |               |
|----|---|---------------|---------------|---------------|
| 62 | H | -1.9861669633 | -1.5293913717 | 2.4670413233  |
| 63 | H | -3.6481700964 | -0.6217460957 | -0.4761981155 |
| 64 | H | -2.7449344909 | -1.1604266156 | -1.8827400639 |
| 65 | H | -0.7288100273 | -0.6432029327 | -0.8767389368 |
| 66 | H | -2.6249484486 | 0.2660538450  | 1.2852079644  |
| 67 | H | 2.1284836562  | -2.4071210393 | 0.4401368396  |
| 68 | H | 3.0896322938  | 1.7661475686  | 0.6212668059  |
| 69 | H | 6.0137640111  | -1.0578836986 | -0.7925286649 |
| 70 | H | 0.5366933946  | -0.9313888397 | 0.9080494970  |

---

**Q-TU\_anion\_1**

---

E = -2412.35344501182

---

|    |   |               |              |               |
|----|---|---------------|--------------|---------------|
| 1  | C | -8.7391547333 | 3.1510590595 | -2.7585389400 |
| 2  | O | -9.1902081649 | 2.2243809764 | -1.7851071836 |
| 3  | C | -8.8608329206 | 1.0011150747 | 0.1810556902  |
| 4  | C | -7.0578094754 | 2.3895280399 | -0.6547055439 |
| 5  | C | -6.2388871320 | 1.9971880875 | 0.4407998041  |
| 6  | C | -8.0909964069 | 0.6008438920 | 1.2326202441  |
| 7  | C | -6.7622711974 | 1.0815841418 | 1.3962634361  |
| 8  | C | -4.9080332639 | 2.4747582153 | 0.6404747425  |
| 9  | C | -4.2197061657 | 1.9937363629 | 1.7312039720  |
| 10 | C | -4.8291251793 | 1.0828937395 | 2.6127202555  |
| 11 | N | -6.0576587013 | 0.6325958931 | 2.4714825946  |
| 12 | C | -4.2400166052 | 3.5080196364 | -0.2584710465 |
| 13 | C | -4.2881274655 | 4.8890905070 | 0.4378219904  |
| 14 | C | -5.7115421447 | 5.3675071963 | 0.8292580269  |
| 15 | C | -5.7786385876 | 6.8848285020 | 0.6009594389  |
| 16 | C | -4.5563946059 | 7.5449448665 | 1.2861631057  |
| 17 | C | -3.2965795510 | 7.0555434374 | 0.5166307192  |
| 18 | C | -4.7157952086 | 9.0370259110 | 1.4139451433  |
| 19 | C | -3.8365478662 | 9.9857468671 | 1.1026062486  |
| 20 | N | -3.6056879301 | 5.9198520330 | -0.3573992381 |
| 21 | N | -2.8568983520 | 3.1771372242 | -0.4851894166 |
| 22 | C | -2.4902338839 | 2.6690105635 | -1.6095332890 |
| 23 | N | -1.1018633409 | 2.5205476009 | -1.7905810363 |
| 24 | C | -0.0540994467 | 3.1651506203 | -1.1550804156 |
| 25 | C | -0.2104359544 | 4.1967372719 | -0.2153422857 |
| 26 | C | 0.9075066614  | 4.8055525916 | 0.3403745301  |
| 27 | C | 2.2007919326  | 4.4299946964 | -0.0011112628 |
| 28 | C | 1.2538296433  | 2.7855229667 | -1.5038627243 |
| 29 | C | 2.3538191352  | 3.4113696445 | -0.9367773437 |
| 30 | C | 0.6842214905  | 5.9432403964 | 1.2996547576  |
| 31 | C | 3.7369246336  | 2.9332732975 | -1.2819696303 |
| 32 | F | 1.7823828463  | 6.2228169607 | 2.0227738968  |
| 33 | F | -0.3064079485 | 5.6813756027 | 2.1740560878  |
| 34 | F | 0.3398540014  | 7.0780509485 | 0.6621863394  |
| 35 | F | 4.1522005084  | 1.9587685890 | -0.4495902721 |
| 36 | F | 4.6448533224  | 3.9215816025 | -1.1986096818 |
| 37 | F | 3.8075434151  | 2.4322595759 | -2.5273175400 |
| 38 | S | -3.4499816879 | 2.1080310163 | -2.9626160193 |
| 39 | H | -8.4990357155 | 4.1200574286 | -2.3039088433 |
| 40 | H | -9.5668429310 | 3.2768591668 | -3.4572344010 |

---

|    |   |               |               |               |
|----|---|---------------|---------------|---------------|
| 41 | H | -7.8615812365 | 2.7749955741  | -3.2977356390 |
| 42 | C | -8.3379239792 | 1.9065733940  | -0.7809680375 |
| 43 | H | -9.8752586596 | 0.6389136391  | 0.0506994393  |
| 44 | H | -8.4657478727 | -0.0938041145 | 1.9774570293  |
| 45 | H | -6.6463497855 | 3.0524879912  | -1.4030402425 |
| 46 | H | -4.2736740654 | 0.7139830141  | 3.4729710861  |
| 47 | H | -3.1946819650 | 2.3096364522  | 1.8961736081  |
| 48 | H | -4.0719737724 | 11.0344343305 | 1.2612767767  |
| 49 | H | -2.8510316564 | 9.7731075712  | 0.6968222916  |
| 50 | H | -5.6740810897 | 9.3469855780  | 1.8345534657  |
| 51 | C | -5.7083454479 | 7.1439023213  | -0.9103342989 |
| 52 | C | -4.4607901668 | 6.3938681839  | -1.4507426369 |
| 53 | H | -4.5180634140 | 7.1479452342  | 2.3127508152  |
| 54 | H | -2.8949796379 | 7.8473081980  | -0.1253549804 |
| 55 | H | -2.4961991466 | 6.7652605927  | 1.2033236910  |
| 56 | H | -6.7077864160 | 7.2901756690  | 1.0166959412  |
| 57 | H | -5.6357906013 | 8.2204840731  | -1.1035710973 |
| 58 | H | -6.6218838928 | 6.7858051951  | -1.3981345757 |
| 59 | H | -3.8542453296 | 7.0426030637  | -2.0922456353 |
| 60 | H | -4.7417799871 | 5.5322798794  | -2.0653204236 |
| 61 | H | -6.4778581186 | 4.8746479300  | 0.2183960972  |
| 62 | H | -5.9301063992 | 5.1110716735  | 1.8717211083  |
| 63 | H | -3.6838770043 | 4.7772802519  | 1.3490684618  |
| 64 | H | -4.7839086932 | 3.5589271236  | -1.2100203268 |
| 65 | H | -0.8537755742 | 1.9867451595  | -2.6118952943 |
| 66 | H | -1.2114347100 | 4.5022833949  | 0.0567163508  |
| 67 | H | 1.4006380218  | 1.9922159839  | -2.2307811947 |
| 68 | H | 3.0615155752  | 4.9131324377  | 0.4432533109  |

---

**Q-TU\_anion\_2**


---

E = -2412.34826184821

---

|    |   |               |              |               |
|----|---|---------------|--------------|---------------|
| 1  | C | -8.7009389212 | 3.0337948509 | -2.8384491940 |
| 2  | O | -9.2506193923 | 2.2762836562 | -1.7739858849 |
| 3  | C | -9.0741769087 | 1.2788744154 | 0.3329031678  |
| 4  | C | -7.1391384310 | 2.4037134964 | -0.5970914808 |
| 5  | C | -6.3836390759 | 2.0800783209 | 0.5639178815  |
| 6  | C | -8.3653052264 | 0.9417344352 | 1.4473812148  |
| 7  | C | -7.0043227359 | 1.3253336486 | 1.5976056304  |
| 8  | C | -5.0234544624 | 2.4685551209 | 0.7573135524  |
| 9  | C | -4.4082854147 | 2.0674626519 | 1.9195956694  |
| 10 | C | -5.1100404176 | 1.3083928560 | 2.8719809158  |
| 11 | N | -6.3665214572 | 0.9426675377 | 2.7389402190  |
| 12 | C | -4.2795073014 | 3.3949782442 | -0.1929823159 |
| 13 | C | -4.3001468157 | 4.8246248448 | 0.4103355212  |
| 14 | C | -5.7031962567 | 5.4651430966 | 0.5214354600  |
| 15 | C | -5.5489108215 | 6.9627206528 | 0.2125334615  |
| 16 | C | -4.3823822520 | 7.5315006212 | 1.0624760473  |
| 17 | C | -3.0783242679 | 6.8707806734 | 0.5358525829  |
| 18 | C | -4.3982955467 | 9.0369275572 | 1.0938309340  |
| 19 | C | -3.4156159504 | 9.8802049625 | 0.7889456967  |
| 20 | N | -3.3786413487 | 5.7133865482 | -0.3151751148 |
| 21 | N | -2.8784082597 | 3.0618840437 | -0.3471319362 |
| 22 | C | -2.3570001827 | 2.0663565951 | -1.1492274664 |

---



|                       |   |                |               |               |
|-----------------------|---|----------------|---------------|---------------|
| 23                    | N | -1.0741363964  | 2.0877008391  | -1.4580429833 |
| 24                    | C | -0.1910715296  | 3.0018607051  | -0.9140307557 |
| 25                    | C | -0.1230376115  | 3.3784851457  | 0.4433474158  |
| 26                    | C | 0.8260635961   | 4.2892926178  | 0.8956842723  |
| 27                    | C | 1.7647128191   | 4.8458180252  | 0.0384198559  |
| 28                    | C | 0.7872893669   | 3.5585107064  | -1.7669531231 |
| 29                    | C | 1.7338012558   | 4.4566558430  | -1.3004804737 |
| 30                    | C | 0.7974578119   | 4.6698639361  | 2.3498369477  |
| 31                    | C | 2.7818350077   | 4.9880039948  | -2.2386858797 |
| 32                    | F | 1.7066265087   | 5.6091373215  | 2.6559594542  |
| 33                    | F | 1.0381079107   | 3.6131956978  | 3.1503953223  |
| 34                    | F | -0.4061423897  | 5.1531355826  | 2.7167680490  |
| 35                    | F | 3.8930558933   | 4.2245970176  | -2.2319990441 |
| 36                    | F | 3.1719338778   | 6.2314009457  | -1.9054315238 |
| 37                    | F | 2.3551166088   | 5.0350665357  | -3.5122760920 |
| 38                    | S | -3.4118249640  | 0.8315071723  | -1.7520381069 |
| 39                    | H | -8.3823576855  | 4.0264772700  | -2.4979799816 |
| 40                    | H | -9.5017315597  | 3.1460142302  | -3.5701041571 |
| 41                    | H | -7.8539147352  | 2.5171672953  | -3.3054669356 |
| 42                    | C | -8.4523375487  | 2.0152183718  | -0.7104156983 |
| 43                    | H | -10.1129128983 | 0.9897675729  | 0.2121737173  |
| 44                    | H | -8.8147675253  | 0.3724941349  | 2.2545464446  |
| 45                    | H | -6.6556199649  | 2.9319080260  | -1.4065922320 |
| 46                    | H | -4.6078336545  | 0.9959775822  | 3.7856183367  |
| 47                    | H | -3.3694726426  | 2.3277179410  | 2.0956040792  |
| 48                    | H | -2.4286876679  | 9.5566481028  | 0.4696516424  |
| 49                    | H | -3.5630102634  | 10.9539621927 | 0.8633025876  |
| 50                    | H | -5.3498035544  | 9.4598384666  | 1.4204969305  |
| 51                    | C | -5.2015673258  | 7.1119264162  | -1.2751240141 |
| 52                    | C | -3.9881777134  | 6.1900432491  | -1.5644225703 |
| 53                    | H | -4.5525164969  | 7.1979298841  | 2.0973491173  |
| 54                    | H | -2.4968684641  | 7.5667985055  | -0.0766511915 |
| 55                    | H | -2.4305141956  | 6.5451446070  | 1.3552596024  |
| 56                    | H | -6.4772832696  | 7.4946394860  | 0.4454751827  |
| 57                    | H | -4.9628066837  | 8.1574262267  | -1.5004914880 |
| 58                    | H | -6.0599553933  | 6.8321934384  | -1.8954576054 |
| 59                    | H | -3.2145615761  | 6.7104672327  | -2.1374496484 |
| 60                    | H | -4.2770277198  | 5.3155292585  | -2.1561426424 |
| 61                    | H | -6.4049345618  | 5.0143793007  | -0.1899418939 |
| 62                    | H | -6.1196352875  | 5.3015486338  | 1.5204052263  |
| 63                    | H | -3.8712680591  | 4.7248504489  | 1.4160760181  |
| 64                    | H | -4.7744501984  | 3.3887005342  | -1.1710508234 |
| 65                    | H | -2.3379864416  | 3.9257315403  | -0.3412334824 |
| 66                    | H | -0.8389441796  | 2.9638495148  | 1.1443931666  |
| 67                    | H | 0.7635812754   | 3.2684318580  | -2.8118146615 |
| 68                    | H | 2.4917996726   | 5.5638077628  | 0.3949390776  |
| <b>Q-TU_anion_4</b>   |   |                |               |               |
| E = -2412.33006873694 |   |                |               |               |
| 1                     | C | -6.6860981489  | 1.2553246129  | 1.9363320868  |
| 2                     | O | -6.7104891568  | 2.3440769333  | 1.0278732797  |
| 3                     | C | -5.6830559311  | 3.6845653904  | -0.5887233042 |
| 4                     | C | -4.3908030557  | 1.9318198347  | 0.4761894823  |

---

|    |   |               |               |               |
|----|---|---------------|---------------|---------------|
| 5  | C | -3.2532587509 | 2.2834098877  | -0.3041079074 |
| 6  | C | -4.6054670887 | 4.0471285579  | -1.3402923641 |
| 7  | C | -3.3634370126 | 3.3631556660  | -1.2254388850 |
| 8  | C | -1.9995336702 | 1.6037902620  | -0.2274286404 |
| 9  | C | -0.9846757683 | 2.0582077417  | -1.0397213241 |
| 10 | C | -1.1965595814 | 3.1412024355  | -1.9100553922 |
| 11 | N | -2.3391018502 | 3.7851546620  | -2.0162004085 |
| 12 | C | -1.7263393285 | 0.4213493672  | 0.7063298760  |
| 13 | C | -1.5020967822 | -0.8314865997 | -0.1956900170 |
| 14 | C | -2.8206617605 | -1.2164472736 | -0.9305410555 |
| 15 | C | -3.2243504431 | -2.6342433712 | -0.5049615415 |
| 16 | C | -2.1247363821 | -3.6195424177 | -0.9770783185 |
| 17 | C | -0.7868400304 | -3.1122902185 | -0.3714382497 |
| 18 | C | -2.5126876934 | -5.0445232249 | -0.6731973610 |
| 19 | C | -1.9714152318 | -5.8891962099 | 0.2003758198  |
| 20 | N | -0.9874893857 | -1.9902397411 | 0.5591209204  |
| 21 | N | -0.8196989664 | 0.8902633037  | 1.7564108999  |
| 22 | C | 0.4699401358  | 0.7641101816  | 1.7876280716  |
| 23 | N | 1.0939737089  | -0.1622285847 | 0.9169477207  |
| 24 | C | 2.4126842715  | -0.3434724449 | 0.5554764867  |
| 25 | C | 2.8129237819  | -1.6376988815 | 0.1886081480  |
| 26 | C | 4.0933882622  | -1.8835888506 | -0.2888293843 |
| 27 | C | 5.0192013908  | -0.8566303749 | -0.4145959688 |
| 28 | C | 3.3483601771  | 0.6967305498  | 0.4267556388  |
| 29 | C | 4.6237149440  | 0.4281312763  | -0.0496964817 |
| 30 | C | 4.4558186433  | -3.2733115890 | -0.7331114974 |
| 31 | C | 5.6282687652  | 1.5433226653  | -0.1443198313 |
| 32 | F | 5.7784465580  | -3.5020770066 | -0.6464366617 |
| 33 | F | 4.1090595335  | -3.4965613361 | -2.0147269086 |
| 34 | F | 3.8404983127  | -4.2167946205 | 0.0009168452  |
| 35 | F | 6.4656971616  | 1.3732194853  | -1.1836451108 |
| 36 | F | 6.4003005777  | 1.6202705892  | 0.9569920549  |
| 37 | F | 5.0473024023  | 2.7454575486  | -0.2979580546 |
| 38 | S | 1.4416317588  | 1.6377051004  | 2.9441665787  |
| 39 | H | -7.6891994141 | 1.1970895797  | 2.3597003803  |
| 40 | H | -5.9626553589 | 1.4212468157  | 2.7432408222  |
| 41 | H | -6.4547662156 | 0.3141333198  | 1.4232648237  |
| 42 | C | -5.5774275413 | 2.6109818991  | 0.3360636077  |
| 43 | H | -6.6335530721 | 4.2003948413  | -0.6750364942 |
| 44 | H | -4.6593106932 | 4.8646737786  | -2.0518593717 |
| 45 | H | -4.3042852466 | 1.1313327223  | 1.1974833110  |
| 46 | H | -0.3829721930 | 3.4863950176  | -2.5449700085 |
| 47 | H | -0.0055034101 | 1.5898407862  | -1.0005696722 |
| 48 | H | -2.3751428054 | -6.8894844517 | 0.3281964671  |
| 49 | H | -1.1135944607 | -5.6418443909 | 0.8199948877  |
| 50 | H | -3.3766309203 | -5.3901377216 | -1.2428815733 |
| 51 | C | -3.3325563363 | -2.6734196084 | 1.0264888489  |
| 52 | C | -1.9237957229 | -2.4045727005 | 1.6138326793  |
| 53 | H | -2.0710971334 | -3.5341216318 | -2.0706124787 |
| 54 | H | -0.2545982223 | -3.9001764452 | 0.1690508659  |
| 55 | H | -0.1143145766 | -2.7681611801 | -1.1638926785 |
| 56 | H | -4.1837697808 | -2.9016644108 | -0.9600223296 |

---

|    |   |               |               |               |
|----|---|---------------|---------------|---------------|
| 57 | H | -3.7129035265 | -3.6424304017 | 1.3630997899  |
| 58 | H | -4.0448629846 | -1.9092084016 | 1.3599106077  |
| 59 | H | -1.5101234784 | -3.3090704053 | 2.0707501683  |
| 60 | H | -1.9358470034 | -1.6341723378 | 2.3899831592  |
| 61 | H | -3.6257678024 | -0.5156809868 | -0.6820796476 |
| 62 | H | -2.6848142117 | -1.1634409711 | -2.0161005944 |
| 63 | H | -0.7271720566 | -0.5955346095 | -0.9323049293 |
| 64 | H | -2.6546246331 | 0.2019958981  | 1.2446834396  |
| 65 | H | 2.1078540191  | -2.4569484238 | 0.2934795124  |
| 66 | H | 3.0650845119  | 1.7008188392  | 0.7116899048  |
| 67 | H | 6.0176552938  | -1.0469618865 | -0.7879100657 |
| 68 | H | 0.5121406094  | -1.0055358391 | 0.8206173263  |

---

**DQ-TU\_anion\_1**

---

E = -2411.09802235152

---

|    |   |               |               |               |
|----|---|---------------|---------------|---------------|
| 1  | C | -8.6605194959 | 3.1153258909  | -2.7648922209 |
| 2  | O | -9.0748240596 | 2.2012771643  | -1.7634452873 |
| 3  | C | -8.6948695487 | 1.0432018211  | 0.2326133369  |
| 4  | C | -6.9443014408 | 2.4694240218  | -0.6489507957 |
| 5  | C | -6.1073105094 | 2.1326812302  | 0.4513079007  |
| 6  | C | -7.9076089719 | 0.6971865144  | 1.2906172808  |
| 7  | C | -6.5953156546 | 1.2272426376  | 1.4345947561  |
| 8  | C | -4.7925883297 | 2.6606352641  | 0.6295915707  |
| 9  | C | -4.0839402676 | 2.2362824164  | 1.7307612545  |
| 10 | C | -4.6587932689 | 1.3315304848  | 2.6416474546  |
| 11 | N | -5.8711473340 | 0.8342933001  | 2.5186963725  |
| 12 | C | -4.1674761454 | 3.6886624348  | -0.3060975449 |
| 13 | C | -4.2506997058 | 5.0843448468  | 0.3510538844  |
| 14 | C | -5.6762361285 | 5.5026673470  | 0.8001987235  |
| 15 | C | -5.8397139770 | 7.0068933749  | 0.5377385879  |
| 16 | C | -4.6154821450 | 7.7391884648  | 1.1494269300  |
| 17 | C | -3.3605270817 | 7.2862600935  | 0.3197219941  |
| 18 | C | -4.7738506534 | 9.1922201175  | 1.1638592344  |
| 19 | C | -4.8998899811 | 10.3919804211 | 1.1480590884  |
| 20 | N | -3.6641306316 | 6.1247584809  | -0.5080631627 |
| 21 | N | -2.7797519908 | 3.3795368875  | -0.5480054755 |
| 22 | C | -2.4321908253 | 2.8569186871  | -1.6732467832 |
| 23 | N | -1.0566877205 | 2.6455553773  | -1.8720977769 |
| 24 | C | 0.0438080010  | 3.0811245450  | -1.1570735396 |
| 25 | C | -0.0093094816 | 3.9270057389  | -0.0393793832 |
| 26 | C | 1.1660155766  | 4.3237321407  | 0.5896158406  |
| 27 | C | 2.4151144823  | 3.9090765424  | 0.1497942963  |
| 28 | C | 1.3106004942  | 2.6630115493  | -1.6062259167 |
| 29 | C | 2.4666562721  | 3.0738470674  | -0.9638775653 |
| 30 | C | 1.0473772852  | 5.1972872316  | 1.8091549122  |
| 31 | C | 3.8015189294  | 2.5626129746  | -1.4315761069 |
| 32 | F | 2.2250891054  | 5.7349986825  | 2.1689455312  |
| 33 | F | 0.5922443121  | 4.5074594094  | 2.8724459047  |
| 34 | F | 0.1900531817  | 6.2174489785  | 1.6206198427  |
| 35 | F | 4.1869747533  | 1.4714796503  | -0.7421677375 |
| 36 | F | 4.7722857981  | 3.4795289025  | -1.2711402619 |
| 37 | F | 3.7920453882  | 2.2167678637  | -2.7298977215 |
| 38 | S | -3.4149988486 | 2.3357855629  | -3.0284363899 |

---

|    |   |               |               |               |
|----|---|---------------|---------------|---------------|
| 39 | H | -8.4553838632 | 4.1052573839  | -2.3391224223 |
| 40 | H | -9.4943847271 | 3.1903515610  | -3.4634996629 |
| 41 | H | -7.7710652405 | 2.7565800318  | -3.2963916867 |
| 42 | C | -8.2076957942 | 1.9401527011  | -0.7558937287 |
| 43 | H | -9.6968495571 | 0.6431561570  | 0.1171317906  |
| 44 | H | -8.2559873601 | 0.0104380917  | 2.0554617463  |
| 45 | H | -6.5580902473 | 3.1246706052  | -1.4172738371 |
| 46 | H | -4.0880703065 | 1.0083461910  | 3.5103637295  |
| 47 | H | -3.0697021436 | 2.5907274499  | 1.8839414506  |
| 48 | H | -5.0092974319 | 11.4548053537 | 1.1423363092  |
| 49 | C | -5.8523474059 | 7.2306586757  | -0.9801563491 |
| 50 | C | -4.5971477082 | 6.5303182821  | -1.5658919227 |
| 51 | H | -4.5007417254 | 7.3992585271  | 2.1868860467  |
| 52 | H | -3.0313704141 | 8.0979316089  | -0.3374559359 |
| 53 | H | -2.5262261662 | 7.0422457461  | 0.9848349292  |
| 54 | H | -6.7613980067 | 7.3799724900  | 0.9926798958  |
| 55 | H | -5.8498745167 | 8.3041491418  | -1.2011066649 |
| 56 | H | -6.7694170058 | 6.8131500059  | -1.4097551941 |
| 57 | H | -4.0566272580 | 7.1916649431  | -2.2513921887 |
| 58 | H | -4.8636410046 | 5.6405040896  | -2.1449285816 |
| 59 | H | -6.4442472355 | 4.9588257789  | 0.2373535700  |
| 60 | H | -5.8337056574 | 5.2614716882  | 1.8569293016  |
| 61 | H | -3.5996216339 | 5.0312813801  | 1.2350641380  |
| 62 | H | -4.7260241975 | 3.7002193262  | -1.2492886579 |
| 63 | H | -0.8512364395 | 2.1568139256  | -2.7320901912 |
| 64 | H | -0.9764873695 | 4.2642464301  | 0.3050027742  |
| 65 | H | 1.3778998552  | 2.0141162659  | -2.4741218303 |
| 66 | H | 3.3206311792  | 4.2314720499  | 0.6475221451  |

---

**DQ-TU\_anion\_2**


---

E = -2411.09288370535

|    |   |               |               |               |
|----|---|---------------|---------------|---------------|
| 1  | C | -8.6765651785 | 3.0963215366  | -2.8397038290 |
| 2  | O | -9.2308374298 | 2.3427705090  | -1.7748729854 |
| 3  | C | -9.0641960882 | 1.3452630788  | 0.3316112394  |
| 4  | C | -7.1162732770 | 2.4470035586  | -0.5995806744 |
| 5  | C | -6.3643966768 | 2.1152356657  | 0.5618864073  |
| 6  | C | -8.3589095899 | 0.9991162898  | 1.4453484042  |
| 7  | C | -6.9934423013 | 1.3664333895  | 1.5950578519  |
| 8  | C | -5.0001663604 | 2.4881555350  | 0.7570334672  |
| 9  | C | -4.3893083062 | 2.0770044953  | 1.9182219053  |
| 10 | C | -5.0992212099 | 1.3239804282  | 2.8690439680  |
| 11 | N | -6.3600450048 | 0.9738917961  | 2.7353731665  |
| 12 | C | -4.2418808034 | 3.4058853180  | -0.1912261074 |
| 13 | C | -4.2387844242 | 4.8334386977  | 0.4169166739  |
| 14 | C | -5.6317576540 | 5.4992734688  | 0.5113987924  |
| 15 | C | -5.4613519818 | 6.9897611773  | 0.1783167108  |
| 16 | C | -4.3032326248 | 7.5523812597  | 1.0470283390  |
| 17 | C | -2.9857189385 | 6.8529898371  | 0.5588772167  |
| 18 | C | -4.2103620632 | 9.0102695792  | 0.9852747927  |
| 19 | C | -4.1244450328 | 10.2108728523 | 0.9091777604  |
| 20 | N | -3.2918715913 | 5.7078728745  | -0.2945788154 |
| 21 | N | -2.8476997327 | 3.0466726924  | -0.3475499651 |
| 22 | C | -2.3474445656 | 2.0518635583  | -1.1642535473 |

---

|                       |   |                |               |               |
|-----------------------|---|----------------|---------------|---------------|
| 23                    | N | -1.0645753509  | 2.0503225197  | -1.4727467440 |
| 24                    | C | -0.1622148563  | 2.9374080301  | -0.9152408291 |
| 25                    | C | -0.0857652423  | 3.2909264141  | 0.4479761122  |
| 26                    | C | 0.8848382666   | 4.1710596487  | 0.9153108821  |
| 27                    | C | 1.8355647940   | 4.7194861562  | 0.0663743429  |
| 28                    | C | 0.8273716685   | 3.4863357930  | -1.7600865909 |
| 29                    | C | 1.7944577379   | 4.3544694448  | -1.2792034308 |
| 30                    | C | 0.8677305645   | 4.5253397664  | 2.3766212411  |
| 31                    | C | 2.8563941106   | 4.8762581467  | -2.2070305843 |
| 32                    | F | 1.8039694639   | 5.4318123726  | 2.6997043908  |
| 33                    | F | 1.0784090421   | 3.4468239284  | 3.1563259946  |
| 34                    | F | -0.3209061884  | 5.0362814402  | 2.7542747362  |
| 35                    | F | 3.9522831491   | 4.0908390959  | -2.2036512830 |
| 36                    | F | 3.2692151515   | 6.1077318983  | -1.8571278448 |
| 37                    | F | 2.4371710735   | 4.9466788721  | -3.4819279545 |
| 38                    | S | -3.4285244216  | 0.8475148400  | -1.7826848358 |
| 39                    | H | -8.3474070809  | 4.0851846916  | -2.4984983357 |
| 40                    | H | -9.4782918871  | 3.2178547006  | -3.5689363984 |
| 41                    | H | -7.8362308827  | 2.5718778001  | -3.3099666147 |
| 42                    | C | -8.4340956899  | 2.0738241794  | -0.7121358458 |
| 43                    | H | -10.1064539057 | 1.0692711963  | 0.2109868330  |
| 44                    | H | -8.8146958539  | 0.4350712906  | 2.2525113888  |
| 45                    | H | -6.6263943768  | 2.9667266422  | -1.4108642449 |
| 46                    | H | -4.6003064338  | 1.0029647253  | 3.7814728548  |
| 47                    | H | -3.3473161435  | 2.3241228552  | 2.0947372983  |
| 48                    | H | -4.0471526084  | 11.2747821930 | 0.8523260370  |
| 49                    | C | -5.0828873031  | 7.1141600964  | -1.3035905407 |
| 50                    | C | -3.8656524231  | 6.1871426135  | -1.5594992290 |
| 51                    | H | -4.4936515306  | 7.2699946609  | 2.0902238646  |
| 52                    | H | -2.3740275518  | 7.5528294018  | -0.0181397405 |
| 53                    | H | -2.3848714562  | 6.5136363880  | 1.4074489550  |
| 54                    | H | -6.3827928246  | 7.5378476476  | 0.3908238495  |
| 55                    | H | -4.8442990192  | 8.1567503457  | -1.5413348377 |
| 56                    | H | -5.9317690101  | 6.8241300611  | -1.9316235256 |
| 57                    | H | -3.0747678239  | 6.7042689129  | -2.1110118732 |
| 58                    | H | -4.1413367461  | 5.3129831786  | -2.1574654541 |
| 59                    | H | -6.3358632907  | 5.0504133466  | -0.1981329248 |
| 60                    | H | -6.0580389763  | 5.3574249578  | 1.5092725573  |
| 61                    | H | -3.8238750949  | 4.7229328491  | 1.4271213024  |
| 62                    | H | -4.7376218158  | 3.4109400581  | -1.1687615259 |
| 63                    | H | -2.2859734726  | 3.8960190710  | -0.3245916317 |
| 64                    | H | -0.8113759574  | 2.8823374752  | 1.1425093177  |
| 65                    | H | 0.7961152652   | 3.2144943683  | -2.8097151673 |
| 66                    | H | 2.5803957658   | 5.4128683283  | 0.4346652577  |
| <b>DQ-TU_anion_4</b>  |   |                |               |               |
| E = -2411.07390356070 |   |                |               |               |
| 1                     | C | -6.6538251537  | 1.2705904129  | 1.9913592430  |
| 2                     | O | -6.7050408265  | 2.3291538682  | 1.0490141098  |
| 3                     | C | -5.7231380268  | 3.6210328381  | -0.6338614646 |
| 4                     | C | -4.3933101664  | 1.9177218313  | 0.4647756380  |
| 5                     | C | -3.2748479477  | 2.2517586848  | -0.3501492335 |
| 6                     | C | -4.6639658206  | 3.9672473000  | -1.4184897036 |

---

|    |   |               |               |               |
|----|---|---------------|---------------|---------------|
| 7  | C | -3.4133784793 | 3.2988209923  | -1.3048171236 |
| 8  | C | -2.0142310179 | 1.5843942350  | -0.2777285875 |
| 9  | C | -1.0200866262 | 2.0200976716  | -1.1251657447 |
| 10 | C | -1.2585806729 | 3.0728697881  | -2.0251503036 |
| 11 | N | -2.4088305155 | 3.7032715972  | -2.1294512858 |
| 12 | C | -1.7144097588 | 0.4333008157  | 0.6865492006  |
| 13 | C | -1.4960474039 | -0.8444761461 | -0.1812968434 |
| 14 | C | -2.8278416463 | -1.2664446972 | -0.8697913358 |
| 15 | C | -3.2162418701 | -2.6679659889 | -0.3807017448 |
| 16 | C | -2.1206774006 | -3.6551481480 | -0.8554287698 |
| 17 | C | -0.7580223372 | -3.1204009172 | -0.2921157757 |
| 18 | C | -2.3939998544 | -5.0325347775 | -0.4433675462 |
| 19 | C | -2.6144531233 | -6.1617131552 | -0.0815273300 |
| 20 | N | -0.9526402872 | -1.9733090824 | 0.5986855926  |
| 21 | N | -0.7952850719 | 0.9383604864  | 1.7078076675  |
| 22 | C | 0.4967483009  | 0.8336270125  | 1.7178686635  |
| 23 | N | 1.1191040231  | -0.1006993552 | 0.8531711977  |
| 24 | C | 2.4359208863  | -0.2815291517 | 0.4808918322  |
| 25 | C | 2.8321374358  | -1.5821465728 | 0.1253406612  |
| 26 | C | 4.1057760788  | -1.8355189535 | -0.3603320109 |
| 27 | C | 5.0342852145  | -0.8106043305 | -0.5063317687 |
| 28 | C | 3.3718614826  | 0.7527809413  | 0.3333260028  |
| 29 | C | 4.6455323658  | 0.4758739305  | -0.1505582947 |
| 30 | C | 4.4688991752  | -3.2300874726 | -0.7883499387 |
| 31 | C | 5.5983740516  | 1.6250032668  | -0.3372627614 |
| 32 | F | 5.7831037373  | -3.4761936549 | -0.6388162194 |
| 33 | F | 4.1828728939  | -3.4461171947 | -2.0863671608 |
| 34 | F | 3.8066845551  | -4.1664483568 | -0.0876210557 |
| 35 | F | 5.1960782993  | 2.4471099896  | -1.3260282226 |
| 36 | F | 6.8382065408  | 1.2146581991  | -0.6538185459 |
| 37 | F | 5.7039195547  | 2.3821689746  | 0.7692400731  |
| 38 | S | 1.4747218614  | 1.7473372163  | 2.8354871314  |
| 39 | H | -7.6483270670 | 1.2175069981  | 2.4351701074  |
| 40 | H | -5.9172753348 | 1.4682655306  | 2.7790582896  |
| 41 | H | -6.4239086109 | 0.3152450988  | 1.5045054213  |
| 42 | C | -5.5887031068 | 2.5814439375  | 0.3252838497  |
| 43 | H | -6.6802020256 | 4.1247399735  | -0.7189640234 |
| 44 | H | -4.7398625262 | 4.7589106872  | -2.1567864014 |
| 45 | H | -4.2851040063 | 1.1448257171  | 1.2127206114  |
| 46 | H | -0.4607757877 | 3.4041434803  | -2.6869351387 |
| 47 | H | -0.0365352320 | 1.5607129247  | -1.0923073090 |
| 48 | H | -2.8086315355 | -7.1646546829 | 0.2304506909  |
| 49 | C | -3.2767828363 | -2.6611794008 | 1.1534553325  |
| 50 | C | -1.8553332677 | -2.3583536834 | 1.6932219954  |
| 51 | H | -2.0916674775 | -3.6308136116 | -1.9510630339 |
| 52 | H | -0.2370588536 | -3.9045743314 | 0.2644764590  |
| 53 | H | -0.1060273402 | -2.8068083803 | -1.1131437608 |
| 54 | H | -4.1822670304 | -2.9617435726 | -0.8000602040 |
| 55 | H | -3.6395736183 | -3.6237857174 | 1.5264755507  |
| 56 | H | -3.9886537648 | -1.8949560758 | 1.4817379509  |
| 57 | H | -1.4203739153 | -3.2414196809 | 2.1712045086  |
| 58 | H | -1.8550457647 | -1.5588050959 | 2.4389839252  |

---

|                       |   |                |               |               |
|-----------------------|---|----------------|---------------|---------------|
| 59                    | H | -3.6325907935  | -0.5629554287 | -0.6293957080 |
| 60                    | H | -2.7191002770  | -1.2547432737 | -1.9594843849 |
| 61                    | H | -0.7417005168  | -0.6253213969 | -0.9437449408 |
| 62                    | H | -2.6318136071  | 0.2216286986  | 1.2461390532  |
| 63                    | H | 2.1283686191   | -2.3996328426 | 0.2499138409  |
| 64                    | H | 3.0974581408   | 1.7600615878  | 0.6195080835  |
| 65                    | H | 6.0312163467   | -1.0098184139 | -0.8772173192 |
| 66                    | H | 0.5490787403   | -0.9534411421 | 0.7879583117  |
| <b>HQ-TU_cation_1</b> |   |                |               |               |
| E = -2414.51843241094 |   |                |               |               |
| 1                     | C | -10.1534046243 | 2.4300733486  | -2.7434578107 |
| 2                     | O | -8.8248309617  | 2.7561524495  | -2.3664923014 |
| 3                     | C | -9.0770102667  | 1.4017973569  | -0.3476057150 |
| 4                     | C | -7.0426551943  | 2.6003802506  | -0.8880365192 |
| 5                     | C | -6.4309092574  | 2.1295413312  | 0.2950614576  |
| 6                     | C | -8.4990113955  | 0.9270473932  | 0.8001034834  |
| 7                     | C | -7.1723122586  | 1.2673255655  | 1.1548909810  |
| 8                     | C | -5.0962707852  | 2.4524695973  | 0.6964842774  |
| 9                     | C | -4.6164049351  | 1.9087679188  | 1.8614970015  |
| 10                    | C | -5.4370593194  | 1.0592700359  | 2.6343465886  |
| 11                    | N | -6.6705746973  | 0.7452793393  | 2.3120106877  |
| 12                    | C | -4.2317383945  | 3.4150172093  | -0.0943259935 |
| 13                    | C | -4.1937081421  | 4.8090736273  | 0.5843500894  |
| 14                    | C | -5.5089305456  | 5.6146514235  | 0.4588997083  |
| 15                    | C | -5.1141882536  | 7.0783514217  | 0.1791437595  |
| 16                    | C | -4.0857961573  | 7.4931192691  | 1.2598884118  |
| 17                    | C | -2.7840839728  | 6.6946703920  | 0.9823099066  |
| 18                    | C | -3.8450351006  | 8.9959655467  | 1.4730772983  |
| 19                    | C | -3.3751259547  | 9.8262946259  | 0.2776478600  |
| 20                    | N | -3.0445647149  | 5.5750950133  | 0.0704064690  |
| 21                    | N | -2.8283928410  | 3.0047977790  | -0.1603236384 |
| 22                    | C | -2.2973676794  | 1.9852760682  | -0.7909475333 |
| 23                    | N | -0.9784877666  | 1.9443614850  | -1.0077987731 |
| 24                    | C | -0.1050497923  | 3.0239230686  | -0.6739695319 |
| 25                    | C | 0.7954480535   | 2.8714287579  | 0.3711258718  |
| 26                    | C | 1.6415356954   | 3.9299799865  | 0.6947881008  |
| 27                    | C | 1.5741898329   | 5.1271991067  | -0.0028758471 |
| 28                    | C | -0.1796608582  | 4.2164355966  | -1.3927685713 |
| 29                    | C | 0.6578292313   | 5.2656241888  | -1.0430085714 |
| 30                    | C | 2.6555178543   | 3.7406224389  | 1.7919888709  |
| 31                    | C | 0.5840240126   | 6.5840032577  | -1.7664413831 |
| 32                    | F | 3.1554597533   | 4.9106903099  | 2.2216945817  |
| 33                    | F | 3.6894251737   | 2.9904850652  | 1.3716821695  |
| 34                    | F | 2.1185636679   | 3.1133273061  | 2.8503664683  |
| 35                    | F | -0.1425774201  | 6.5062010575  | -2.8904895764 |
| 36                    | F | 1.8085541517   | 7.0265499784  | -2.1018559470 |
| 37                    | F | 0.0244837855   | 7.5377103031  | -0.9956310769 |
| 38                    | S | -3.3519428366  | 0.6818364777  | -1.3350738634 |
| 39                    | H | -10.3259442794 | 2.9390804928  | -3.6918132194 |
| 40                    | H | -10.8813055952 | 2.7922378431  | -2.0089493407 |
| 41                    | H | -10.2774295402 | 1.3516395546  | -2.8922152263 |
| 42                    | C | -8.3367954414  | 2.2498751510  | -1.2090930044 |

|    |   |                |               |               |
|----|---|----------------|---------------|---------------|
| 43 | H | -10.0952523990 | 1.1198036515  | -0.5871759114 |
| 44 | H | -9.0456405518  | 0.2731553285  | 1.4712155283  |
| 45 | H | -6.5230293126  | 3.2487650436  | -1.5826151473 |
| 46 | H | -5.0529175745  | 0.6310766287  | 3.5573201605  |
| 47 | H | -3.6090004748  | 2.1241254866  | 2.2054059660  |
| 48 | H | -4.1681721734  | 9.9639027646  | -0.4637595400 |
| 49 | H | -2.5099363774  | 9.3838481335  | -0.2298358836 |
| 50 | H | -3.0735482783  | 10.8256757059 | 0.6082767400  |
| 51 | H | -3.1036598864  | 9.0954890193  | 2.2777190731  |
| 52 | H | -4.7673602924  | 9.4427612585  | 1.8655201843  |
| 53 | C | -4.5111262443  | 7.1050498387  | -1.2362010423 |
| 54 | C | -3.3322390457  | 6.1004534959  | -1.2720683343 |
| 55 | H | -4.4941558706  | 7.1365511956  | 2.2157435434  |
| 56 | H | -2.0160292261  | 7.3195691538  | 0.5176195628  |
| 57 | H | -2.3597410614  | 6.3031137110  | 1.9125336306  |
| 58 | H | -5.9980196732  | 7.7232031365  | 0.2287798174  |
| 59 | H | -4.1728682704  | 8.1053296229  | -1.5098600758 |
| 60 | H | -5.2821368397  | 6.8267888410  | -1.9624992632 |
| 61 | H | -2.4212094340  | 6.5720802976  | -1.6473885896 |
| 62 | H | -3.5477985682  | 5.2583790574  | -1.9376630025 |
| 63 | H | -6.1359586362  | 5.2401864040  | -0.3580776668 |
| 64 | H | -6.0988164072  | 5.5256585495  | 1.3756310488  |
| 65 | H | -3.9766344832  | 4.6282213562  | 1.6435890779  |
| 66 | H | -4.6014243557  | 3.5071007976  | -1.1188725902 |
| 67 | H | -2.2226195057  | 3.8084700715  | 0.0785028004  |
| 68 | H | -0.5451497505  | 1.0657530341  | -1.2860314766 |
| 69 | H | 0.8288032718   | 1.9421668597  | 0.9306258336  |
| 70 | H | -0.8853384890  | 4.3176998173  | -2.2098727218 |
| 71 | H | 2.2294148211   | 5.9490770806  | 0.2604934930  |
| 72 | H | -2.4648441415  | 0.2037432693  | -2.2250518140 |

---

**HQ-TU\_cation\_2**


---

E = -2414.56410290504

|    |   |               |               |               |
|----|---|---------------|---------------|---------------|
| 1  | C | -9.7072411186 | 1.3167225087  | -1.4475024247 |
| 2  | O | -8.4893051566 | 2.0441982850  | -1.4442952425 |
| 3  | C | -7.8830285411 | 0.9925325330  | 0.6768878965  |
| 4  | C | -6.4671042606 | 2.6026893624  | -0.4503073206 |
| 5  | C | -5.5044604787 | 2.5017828103  | 0.5790974820  |
| 6  | C | -6.9583206130 | 0.8728606473  | 1.6805279259  |
| 7  | C | -5.7542218306 | 1.6151102869  | 1.6674303627  |
| 8  | C | -4.2832769273 | 3.2457354443  | 0.6128865931  |
| 9  | C | -3.4416342837 | 3.0537249660  | 1.6803568050  |
| 10 | C | -3.7772968289 | 2.1327816931  | 2.6962910791  |
| 11 | N | -4.8881618699 | 1.4345977306  | 2.7072450488  |
| 12 | C | -3.9141001062 | 4.2452787363  | -0.4774783561 |
| 13 | C | -4.0640801457 | 5.6767380930  | 0.0547516882  |
| 14 | C | -5.4734322706 | 6.0259596373  | 0.5714840093  |
| 15 | C | -5.7819123645 | 7.4835527058  | 0.1851884698  |
| 16 | C | -4.5618580387 | 8.3360052419  | 0.6028608090  |
| 17 | C | -3.4165859984 | 8.0079970344  | -0.3727160558 |
| 18 | C | -4.7772155602 | 9.8481382802  | 0.7754733574  |
| 19 | C | -5.3736391154 | 10.6278079507 | -0.3964252121 |
| 20 | N | -3.7103023161 | 6.6793012202  | -1.0152196735 |

---



---

|    |   |                |               |               |
|----|---|----------------|---------------|---------------|
| 21 | N | -2.5552478340  | 4.0465857278  | -0.9498090823 |
| 22 | C | -2.1998094852  | 3.3861326592  | -2.0769320506 |
| 23 | N | -0.9002568739  | 2.9863899127  | -2.1255313981 |
| 24 | C | 0.0054335025   | 2.9266677702  | -1.0383581194 |
| 25 | C | -0.3423678222  | 2.2499401536  | 0.1335222698  |
| 26 | C | 0.5483909260   | 2.2216361427  | 1.1987946422  |
| 27 | C | 1.8017854531   | 2.8183844527  | 1.0966252497  |
| 28 | C | 1.2548470246   | 3.5309115042  | -1.1494047719 |
| 29 | C | 2.1502004932   | 3.4586576651  | -0.0856109708 |
| 30 | C | 0.1281532184   | 1.5844101501  | 2.4958618031  |
| 31 | C | 3.5195660601   | 4.0637737207  | -0.2455393737 |
| 32 | F | 1.1763051254   | 1.0868339996  | 3.1733917478  |
| 33 | F | -0.7477379688  | 0.5853494357  | 2.3039488292  |
| 34 | F | -0.4719621684  | 2.4802572138  | 3.3063074187  |
| 35 | F | 4.3260328465   | 3.2574129120  | -0.9613132889 |
| 36 | F | 4.1169910453   | 4.2768772680  | 0.9388306939  |
| 37 | F | 3.4671816865   | 5.2389098535  | -0.8910301140 |
| 38 | S | -3.2442105432  | 3.0864166385  | -3.3789605240 |
| 39 | H | -9.5313455774  | 0.2355711927  | -1.4770765412 |
| 40 | H | -10.2283439736 | 1.6135964322  | -2.3577711686 |
| 41 | H | -10.3306289394 | 1.5702656624  | -0.5827591923 |
| 42 | C | -7.6341264118  | 1.8700004092  | -0.4082445120 |
| 43 | H | -8.7946565218  | 0.4087478238  | 0.7205651803  |
| 44 | H | -7.1257579247  | 0.2035852323  | 2.5176587724  |
| 45 | H | -6.3175493567  | 3.2388453156  | -1.3142238011 |
| 46 | H | -3.0913362519  | 1.9732427881  | 3.5241280364  |
| 47 | H | -2.5018266255  | 3.5900007091  | 1.7774582118  |
| 48 | H | -6.4194799636  | 10.3613635459 | -0.5777226455 |
| 49 | H | -4.8199727613  | 10.4849090015 | -1.3312642379 |
| 50 | H | -5.3529521531  | 11.7009106349 | -0.1814832124 |
| 51 | H | -3.8098051818  | 10.2947470482 | 1.0395131381  |
| 52 | H | -5.4185497682  | 9.9961666479  | 1.6522097456  |
| 53 | C | -6.0047036339  | 7.5072895002  | -1.3373581624 |
| 54 | C | -4.8036604901  | 6.8400063978  | -2.0287822717 |
| 55 | H | -4.2608317381  | 7.9803997607  | 1.5955974524  |
| 56 | H | -3.3287748307  | 8.7325319996  | -1.1848567323 |
| 57 | H | -2.4513213988  | 7.9284387194  | 0.1293681801  |
| 58 | H | -6.6813209048  | 7.8271987107  | 0.7026935501  |
| 59 | H | -6.1340812306  | 8.5244227270  | -1.7063149839 |
| 60 | H | -6.9179490559  | 6.9596000643  | -1.5833745045 |
| 61 | H | -4.3917554660  | 7.4430920478  | -2.8381630225 |
| 62 | H | -5.0275436202  | 5.8526514547  | -2.4326435072 |
| 63 | H | -6.2201330001  | 5.3540307533  | 0.1358882917  |
| 64 | H | -5.5031515908  | 5.8796743833  | 1.6531549950  |
| 65 | H | -3.3218358128  | 5.8320247609  | 0.8443241594  |
| 66 | H | -4.5570527812  | 4.0996154005  | -1.3435868326 |
| 67 | H | -1.8230201814  | 4.2420723314  | -0.2714672142 |
| 68 | H | -0.5612697630  | 2.6926728477  | -3.0333910458 |
| 69 | H | -1.3034243034  | 1.7528487319  | 0.2080384931  |
| 70 | H | 1.5183787308   | 4.0609793112  | -2.0588233885 |
| 71 | H | 2.4960113561   | 2.7833320587  | 1.9270234897  |
| 72 | H | -2.8615997352  | 6.3528222476  | -1.4966069213 |

---

| HQ-TU_cation_3        |   |               |               |               |
|-----------------------|---|---------------|---------------|---------------|
| E = -2414.53452577752 |   |               |               |               |
| 1                     | C | -5.8402762237 | 4.9739269358  | 1.1362140268  |
| 2                     | O | -5.0566464690 | 3.7937451513  | 1.2143527296  |
| 3                     | C | -4.5817875600 | 3.9628006803  | -1.1768771330 |
| 4                     | C | -3.7209694931 | 2.1792359192  | 0.2160070997  |
| 5                     | C | -3.0609363186 | 1.6037218903  | -0.8914769455 |
| 6                     | C | -3.9499698026 | 3.4203374941  | -2.2647801569 |
| 7                     | C | -3.1774541449 | 2.2403599075  | -2.1595299057 |
| 8                     | C | -2.2688453929 | 0.4105668340  | -0.8225457992 |
| 9                     | C | -1.6747295827 | -0.0290607859 | -1.9766990527 |
| 10                    | C | -1.8606684677 | 0.6786162260  | -3.1861256295 |
| 11                    | N | -2.5778437347 | 1.7712977613  | -3.2940307115 |
| 12                    | C | -2.0809998851 | -0.2850040345 | 0.5196285500  |
| 13                    | C | -1.7206986030 | -1.7719890347 | 0.3894381002  |
| 14                    | C | -2.8240184533 | -2.6397387413 | -0.2459363698 |
| 15                    | C | -2.8492282736 | -3.9972883146 | 0.4813123046  |
| 16                    | C | -1.3886624909 | -4.5012972051 | 0.5530989330  |
| 17                    | C | -0.6500542948 | -3.6262351015 | 1.5834969638  |
| 18                    | C | -1.1669811567 | -6.0045604655 | 0.7852363895  |
| 19                    | C | -1.8195217828 | -6.6481850538 | 2.0087436502  |
| 20                    | N | -1.4201527372 | -2.3483308979 | 1.7488916575  |
| 21                    | N | -1.1407141489 | 0.4395954702  | 1.3815407779  |
| 22                    | C | 0.1473243030  | 0.7115837571  | 1.0342568273  |
| 23                    | N | 0.7394258427  | 0.0186593701  | 0.1383430910  |
| 24                    | C | 2.0292837010  | 0.2819272512  | -0.3095716578 |
| 25                    | C | 2.2488824842  | 1.1747262893  | -1.3640995747 |
| 26                    | C | 3.5374120242  | 1.3919845351  | -1.8339081679 |
| 27                    | C | 4.6275531020  | 0.7325829168  | -1.2729062547 |
| 28                    | C | 3.1190499394  | -0.3891471669 | 0.2487657743  |
| 29                    | C | 4.4047361346  | -0.1580925987 | -0.2318574393 |
| 30                    | C | 3.7521351593  | 2.4065138712  | -2.9245928550 |
| 31                    | C | 5.5496048202  | -0.8810876694 | 0.4246267598  |
| 32                    | F | 4.9098112651  | 2.2065418530  | -3.5778943195 |
| 33                    | F | 3.7886153766  | 3.6571779986  | -2.4286648830 |
| 34                    | F | 2.7644095953  | 2.3752057108  | -3.8339311937 |
| 35                    | F | 5.7083421595  | -0.4839782972 | 1.7002674678  |
| 36                    | F | 6.7164546732  | -0.6712720626 | -0.2081089938 |
| 37                    | F | 5.3402730407  | -2.2075364975 | 0.4554562577  |
| 38                    | S | 0.8451295362  | 2.0956969148  | 1.9591332144  |
| 39                    | H | -5.2396252000 | 5.8367317250  | 0.8273211160  |
| 40                    | H | -6.2163937093 | 5.1480747731  | 2.1443407699  |
| 41                    | H | -6.6905814138 | 4.8485058767  | 0.4568112654  |
| 42                    | C | -4.4666837986 | 3.3320180539  | 0.0865850925  |
| 43                    | H | -5.1641016480 | 4.8687568707  | -1.2948131971 |
| 44                    | H | -4.0247314110 | 3.8841631181  | -3.2426078385 |
| 45                    | H | -3.6743361075 | 1.7407856559  | 1.2053413085  |
| 46                    | H | -1.3865542470 | 0.3188110472  | -4.0966964253 |
| 47                    | H | -1.0424404427 | -0.9081103030 | -1.9958881412 |
| 48                    | H | -1.5663750340 | -6.1386733228 | 2.9453273441  |
| 49                    | H | -1.4788333229 | -7.6831015004 | 2.1135439098  |
| 50                    | H | -2.9100482170 | -6.6812199073 | 1.9233174756  |

|    |   |               |               |               |
|----|---|---------------|---------------|---------------|
| 51 | H | -0.0838235082 | -6.1779775985 | 0.8314389059  |
| 52 | H | -1.5111759485 | -6.5349472255 | -0.1104521904 |
| 53 | C | -3.4393766679 | -3.7509283893 | 1.8800428228  |
| 54 | C | -2.6623355997 | -2.6062593263 | 2.5512188786  |
| 55 | H | -0.9420326160 | -4.2993460718 | -0.4279171656 |
| 56 | H | -0.5943674692 | -4.0896204079 | 2.5706524597  |
| 57 | H | 0.3584603239  | -3.3633488785 | 1.2613966738  |
| 58 | H | -3.4687665357 | -4.7097290322 | -0.0697802818 |
| 59 | H | -3.3952467351 | -4.6488805762 | 2.4956806716  |
| 60 | H | -4.4935759271 | -3.4771146680 | 1.7906018966  |
| 61 | H | -2.3383256819 | -2.8495956198 | 3.5634892418  |
| 62 | H | -3.2283426880 | -1.6760609473 | 2.5943673106  |
| 63 | H | -3.7995873800 | -2.1472564806 | -0.1641817996 |
| 64 | H | -2.6175737077 | -2.7614717378 | -1.3113605039 |
| 65 | H | -0.7784755228 | -1.8598503223 | -0.1505631102 |
| 66 | H | -3.0377628394 | -0.2286984858 | 1.0444876451  |
| 67 | H | 1.4050422500  | 1.6876813308  | -1.8127068599 |
| 68 | H | 2.9538758858  | -1.0945312798 | 1.0570108449  |
| 69 | H | 5.6282365667  | 0.9039822681  | -1.6476881353 |
| 70 | H | -0.8413816092 | -1.6698789164 | 2.2611881282  |
| 71 | H | -1.5572408425 | 0.9866958933  | 2.1246684452  |
| 72 | H | 2.1202786633  | 1.7691485741  | 1.7103949105  |

#### Q-TU\_cation\_1

E = -2413.28010809340

|    |   |                |              |               |
|----|---|----------------|--------------|---------------|
| 1  | C | -10.1156152959 | 2.2998917865 | -2.7278859966 |
| 2  | O | -8.7824207285  | 2.6283530362 | -2.3698229633 |
| 3  | C | -9.0627040331  | 1.4220678286 | -0.2626774838 |
| 4  | C | -7.0081350062  | 2.5487010936 | -0.8760167154 |
| 5  | C | -6.4086336517  | 2.1552298966 | 0.3410817094  |
| 6  | C | -8.4963335398  | 1.0207905805 | 0.9183002742  |
| 7  | C | -7.1663882457  | 1.3661902851 | 1.2554910547  |
| 8  | C | -5.0720432521  | 2.4885013730 | 0.7273384131  |
| 9  | C | -4.6062167411  | 2.0218764622 | 1.9309865739  |
| 10 | C | -5.4418336446  | 1.2386594957 | 2.7558737188  |
| 11 | N | -6.6779628216  | 0.9194396377 | 2.4490590985  |
| 12 | C | -4.1881450699  | 3.3798343972 | -0.1241825073 |
| 13 | C | -4.1425426002  | 4.8220823530 | 0.4469688785  |
| 14 | C | -5.4370170187  | 5.6354491387 | 0.2229851628  |
| 15 | C | -5.0188250854  | 7.0614674709 | -0.1762677093 |
| 16 | C | -4.0018034197  | 7.5869960067 | 0.8708713836  |
| 17 | C | -2.7164479233  | 6.7112586984 | 0.7372253310  |
| 18 | C | -3.6955833436  | 9.0492276302 | 0.7287039220  |
| 19 | C | -3.9563887067  | 9.9731798565 | 1.6484085374  |
| 20 | N | -2.9695568754  | 5.5316476293 | -0.0922944795 |
| 21 | N | -2.7901005701  | 2.9492883316 | -0.1392437805 |
| 22 | C | -2.2645329074  | 1.8795578661 | -0.6866823361 |
| 23 | N | -0.9426310302  | 1.8059489899 | -0.8716509489 |
| 24 | C | -0.0705643781  | 2.9002901305 | -0.5816300271 |
| 25 | C | 0.7344090956   | 2.8511159058 | 0.5472043450  |
| 26 | C | 1.5627400019   | 3.9347788180 | 0.8349435388  |
| 27 | C | 1.5692174502   | 5.0548993071 | 0.0177161868  |
| 28 | C | -0.0676643107  | 4.0131841780 | -1.4221365026 |

|    |   |                |               |               |
|----|---|----------------|---------------|---------------|
| 29 | C | 0.7496477292   | 5.0886887744  | -1.1091296556 |
| 30 | C | 2.4195230011   | 3.8779341641  | 2.0721065919  |
| 31 | C | 0.7563607489   | 6.3271673348  | -1.9647785075 |
| 32 | F | 3.2527260205   | 4.9275297621  | 2.1581035015  |
| 33 | F | 3.1671354784   | 2.7612491359  | 2.0927281254  |
| 34 | F | 1.6656075511   | 3.8662968764  | 3.1836296223  |
| 35 | F | 0.0825916539   | 6.1567023735  | -3.1109940876 |
| 36 | F | 2.0099981865   | 6.6982171723  | -2.2787390881 |
| 37 | F | 0.1920870535   | 7.3688803145  | -1.3220543210 |
| 38 | S | -3.3309666397  | 0.5591863967  | -1.1602226064 |
| 39 | H | -10.2784903476 | 2.7486677774  | -3.7078334903 |
| 40 | H | -10.8386557010 | 2.7207362430  | -2.0203040485 |
| 41 | H | -10.2568184212 | 1.2161184950  | -2.8059654642 |
| 42 | C | -8.3064863042  | 2.1965042997  | -1.1778644814 |
| 43 | H | -10.0840735269 | 1.1388371860  | -0.4868918748 |
| 44 | H | -9.0550229056  | 0.4232631601  | 1.6307962657  |
| 45 | H | -6.4752066192  | 3.1368476398  | -1.6128630657 |
| 46 | H | -5.0679151798  | 0.8700178304  | 3.7083351730  |
| 47 | H | -3.5979905248  | 2.2475704883  | 2.2657628674  |
| 48 | H | -4.4295787452  | 9.7233521863  | 2.5958730385  |
| 49 | H | -3.7093208129  | 11.0195846648 | 1.4945702155  |
| 50 | H | -3.2113223973  | 9.3573379082  | -0.1993154871 |
| 51 | C | -4.3607888508  | 6.9852976048  | -1.5615932691 |
| 52 | C | -3.2061311830  | 5.9538341815  | -1.4816979660 |
| 53 | H | -4.4416312155  | 7.4337667674  | 1.8649119559  |
| 54 | H | -1.9031076495  | 7.2738544053  | 0.2687686777  |
| 55 | H | -2.3621032812  | 6.3887340117  | 1.7205381536  |
| 56 | H | -5.8933929900  | 7.7176001680  | -0.2015867719 |
| 57 | H | -3.9885949349  | 7.9671909604  | -1.8703617470 |
| 58 | H | -5.1031992935  | 6.6850524025  | -2.3077952179 |
| 59 | H | -2.2728833964  | 6.3718773300  | -1.8667592093 |
| 60 | H | -3.4264829492  | 5.0663047960  | -2.0831028707 |
| 61 | H | -6.0538421506  | 5.2041206798  | -0.5729910259 |
| 62 | H | -6.0497989864  | 5.6388985513  | 1.1289664017  |
| 63 | H | -3.9554619825  | 4.7205187094  | 1.5221649168  |
| 64 | H | -4.5446942240  | 3.3971506878  | -1.1575064357 |
| 65 | H | -2.1762729205  | 3.7589432131  | 0.0537722150  |
| 66 | H | -0.5141000971  | 0.9088191987  | -1.0918347898 |
| 67 | H | 0.7098422123   | 1.9816203416  | 1.1963764867  |
| 68 | H | -0.7009276004  | 4.0312886927  | -2.3021689750 |
| 69 | H | 2.2090277647   | 5.8971230725  | 0.2528028699  |
| 70 | H | -2.4282419176  | -0.0085151420 | -1.9788362998 |

---

**Q-TU\_cation\_2**

---

E = -2413.32667716321

---

|   |   |               |              |               |
|---|---|---------------|--------------|---------------|
| 1 | C | -8.5846932088 | 2.5401090039 | -2.2078762010 |
| 2 | O | -8.6853699442 | 1.6278569048 | -1.1252619820 |
| 3 | C | -7.8445195545 | 0.6987150234 | 0.8491767776  |
| 4 | C | -6.5378199141 | 2.3801858251 | -0.3095799335 |
| 5 | C | -5.5309183600 | 2.2897585050 | 0.6896606590  |
| 6 | C | -6.8872863859 | 0.5874842664 | 1.8128100821  |
| 7 | C | -5.7061806577 | 1.3784647130 | 1.7678723995  |
| 8 | C | -4.3413139405 | 3.0763083743 | 0.6882030000  |

---

---

|    |   |               |               |               |
|----|---|---------------|---------------|---------------|
| 9  | C | -3.4516513588 | 2.9041513438  | 1.7232436126  |
| 10 | C | -3.7136858719 | 1.9578084059  | 2.7320641913  |
| 11 | N | -4.7987133448 | 1.2154262486  | 2.7699380055  |
| 12 | C | -4.0503486894 | 4.0995216472  | -0.4039841849 |
| 13 | C | -4.2508230111 | 5.5212733343  | 0.1372592924  |
| 14 | C | -5.6589522035 | 5.8052382558  | 0.6898516772  |
| 15 | C | -6.0623710787 | 7.2320112444  | 0.2907500269  |
| 16 | C | -4.8989722640 | 8.1963224322  | 0.6397453805  |
| 17 | C | -3.7275515974 | 7.8796394351  | -0.3090927219 |
| 18 | C | -5.3473209860 | 9.6343355360  | 0.6349901315  |
| 19 | C | -4.9122539904 | 10.6360667900 | -0.1229716174 |
| 20 | N | -3.9757264571 | 6.5388152754  | -0.9392634427 |
| 21 | N | -2.7008544560 | 3.9645034121  | -0.9228374167 |
| 22 | C | -2.3581362981 | 3.3126147342  | -2.0590982627 |
| 23 | N | -1.0432712788 | 2.9784286413  | -2.1595661691 |
| 24 | C | -0.0883066691 | 2.9875326841  | -1.1139625995 |
| 25 | C | -0.3436796412 | 2.3100507674  | 0.0806841924  |
| 26 | C | 0.5928446953  | 2.3512836602  | 1.1058989230  |
| 27 | C | 1.8031279648  | 3.0178035338  | 0.9402114984  |
| 28 | C | 1.1182544489  | 3.6605385734  | -1.2889475968 |
| 29 | C | 2.0620118707  | 3.6567779209  | -0.2658204763 |
| 30 | C | 0.2673457449  | 1.7037628896  | 2.4251973560  |
| 31 | C | 3.3885896473  | 4.3310355877  | -0.4959190598 |
| 32 | F | 1.3739863684  | 1.3341434779  | 3.0909511792  |
| 33 | F | -0.5020915872 | 0.6142449245  | 2.2712034310  |
| 34 | F | -0.4099528166 | 2.5488673432  | 3.2295262426  |
| 35 | F | 4.2069943373  | 3.5524409101  | -1.2287827842 |
| 36 | F | 4.0225324142  | 4.6027102255  | 0.6570281807  |
| 37 | F | 3.2458147813  | 5.4866585164  | -1.1625897724 |
| 38 | S | -3.4362129149 | 2.9467871161  | -3.3159732930 |
| 39 | H | -8.5329023223 | 3.5746905493  | -1.8482305819 |
| 40 | H | -9.4950648365 | 2.4137188092  | -2.7935619498 |
| 41 | H | -7.7174402935 | 2.3167481070  | -2.8402316204 |
| 42 | C | -7.6711112944 | 1.6068234654  | -0.2299140766 |
| 43 | H | -8.7493556346 | 0.1013776892  | 0.8792914195  |
| 44 | H | -6.9984101003 | -0.1020395147 | 2.6427164947  |
| 45 | H | -6.4062787164 | 3.0432391108  | -1.1529452383 |
| 46 | H | -2.9940396998 | 1.8115016785  | 3.5334003108  |
| 47 | H | -2.5305791801 | 3.4757858968  | 1.7940300626  |
| 48 | H | -4.1222183282 | 10.5410290571 | -0.8619028195 |
| 49 | H | -5.3320895472 | 11.6320056867 | -0.0211396343 |
| 50 | H | -6.1357925436 | 9.8445528038  | 1.3574433476  |
| 51 | C | -6.3105476617 | 7.2699969343  | -1.2226321612 |
| 52 | C | -5.0975572222 | 6.6461683000  | -1.9330217522 |
| 53 | H | -4.5897230657 | 7.9699421903  | 1.6682023927  |
| 54 | H | -3.6436140724 | 8.5846102865  | -1.1363674052 |
| 55 | H | -2.7694113079 | 7.8334270884  | 0.2091600041  |
| 56 | H | -6.9651798993 | 7.5277749751  | 0.8301064473  |
| 57 | H | -6.4621327890 | 8.3014868065  | -1.5516848332 |
| 58 | H | -7.2136804595 | 6.7095168406  | -1.4755303669 |
| 59 | H | -4.7271610295 | 7.2566166156  | -2.7567106071 |
| 60 | H | -5.2886585701 | 5.6460712145  | -2.3219076996 |

---

|                       |   |               |               |               |
|-----------------------|---|---------------|---------------|---------------|
| 61                    | H | -6.3836311476 | 5.0896034150  | 0.2882509664  |
| 62                    | H | -5.6529562771 | 5.6777167941  | 1.7741669752  |
| 63                    | H | -3.4956925733 | 5.7112533688  | 0.9069638461  |
| 64                    | H | -4.7108786944 | 3.9297657857  | -1.2521101769 |
| 65                    | H | -1.9540892105 | 4.1996947430  | -0.2736546740 |
| 66                    | H | -0.7286343057 | 2.6906668844  | -3.0780128176 |
| 67                    | H | -1.2682358173 | 1.7561325451  | 0.2033575125  |
| 68                    | H | 1.3109680128  | 4.1890988226  | -2.2168751459 |
| 69                    | H | 2.5342300017  | 3.0352498980  | 1.7386405382  |
| 70                    | H | -3.1224022071 | 6.2555596694  | -1.4402504827 |
| <b>Q-TU_cation_3</b>  |   |               |               |               |
| E = -2413.29487092283 |   |               |               |               |
| 1                     | C | -5.8590536579 | 5.0024494583  | 0.9747647834  |
| 2                     | O | -5.0896116378 | 3.8158042091  | 1.0877583175  |
| 3                     | C | -4.5685861670 | 3.9378188557  | -1.2966073797 |
| 4                     | C | -3.7501376544 | 2.1719766489  | 0.1442778035  |
| 5                     | C | -3.0748411834 | 1.5706564852  | -0.9400927082 |
| 6                     | C | -3.9215343480 | 3.3698903664  | -2.3625193849 |
| 7                     | C | -3.1626901917 | 2.1849058634  | -2.2214144074 |
| 8                     | C | -2.2935352149 | 0.3728659947  | -0.8348549344 |
| 9                     | C | -1.6814539238 | -0.0917587108 | -1.9698175149 |
| 10                    | C | -1.8397862036 | 0.5947693606  | -3.1952566959 |
| 11                    | N | -2.5467141405 | 1.6902688593  | -3.3362639018 |
| 12                    | C | -2.1361513882 | -0.2996422790 | 0.5228305812  |
| 13                    | C | -1.7728024467 | -1.7887149754 | 0.4264115381  |
| 14                    | C | -2.8592758322 | -2.6684337395 | -0.2152424840 |
| 15                    | C | -2.9168400109 | -4.0036361210 | 0.5428630495  |
| 16                    | C | -1.4722433595 | -4.5470097541 | 0.7005813728  |
| 17                    | C | -0.7259752294 | -3.6176068688 | 1.6775515388  |
| 18                    | C | -1.4622675251 | -6.0039502387 | 1.0820181976  |
| 19                    | C | -0.9092749837 | -6.5770740848 | 2.1464441074  |
| 20                    | N | -1.5041553422 | -2.3422200329 | 1.8002335997  |
| 21                    | N | -1.2147063977 | 0.4392185300  | 1.3926754693  |
| 22                    | C | 0.0787967260  | 0.7102976678  | 1.0663748350  |
| 23                    | N | 0.6905572953  | 0.0053267810  | 0.1933312943  |
| 24                    | C | 1.9853520309  | 0.2730048466  | -0.2378179489 |
| 25                    | C | 2.2151626441  | 1.1593173956  | -1.2954902207 |
| 26                    | C | 3.5094990000  | 1.3827496830  | -1.7464434131 |
| 27                    | C | 4.5950734793  | 0.7345171717  | -1.1643055642 |
| 28                    | C | 3.0708188395  | -0.3873176521 | 0.3416669250  |
| 29                    | C | 4.3621260476  | -0.1507270532 | -0.1206338646 |
| 30                    | C | 3.7319919657  | 2.3892932472  | -2.8429506526 |
| 31                    | C | 5.5019535446  | -0.8618485002 | 0.5572287277  |
| 32                    | F | 4.9115282343  | 2.2084764105  | -3.4617775999 |
| 33                    | F | 3.7258992779  | 3.6460485722  | -2.3615440184 |
| 34                    | F | 2.7707721106  | 2.3246336748  | -3.7786727634 |
| 35                    | F | 5.6470325272  | -0.4466363308 | 1.8287594436  |
| 36                    | F | 6.6745721721  | -0.6577636830 | -0.0666963195 |
| 37                    | F | 5.2954629746  | -2.1882131292 | 0.6042623671  |
| 38                    | S | 0.7522893674  | 2.1144723769  | 1.9785653444  |
| 39                    | H | -5.2431791340 | 5.8536646245  | 0.6637240465  |
| 40                    | H | -6.2530367382 | 5.1970841695  | 1.9722553778  |

|    |   |               |               |               |
|----|---|---------------|---------------|---------------|
| 41 | H | -6.6970893025 | 4.8745962705  | 0.2807150938  |
| 42 | C | -4.4828398464 | 3.3288499818  | -0.0201779325 |
| 43 | H | -5.1404374200 | 4.8463547242  | -1.4423284666 |
| 44 | H | -3.9738261757 | 3.8164121277  | -3.3498026187 |
| 45 | H | -3.7264922013 | 1.7508051510  | 1.1419338019  |
| 46 | H | -1.3515323997 | 0.2149947521  | -4.0901049832 |
| 47 | H | -1.0555860926 | -0.9754481163 | -1.9628427620 |
| 48 | H | -0.3513706953 | -6.0378658953 | 2.9062877139  |
| 49 | H | -0.9785700361 | -7.6498719547 | 2.2974806894  |
| 50 | H | -1.9827314865 | -6.6435000156 | 0.3692537579  |
| 51 | C | -3.5148113071 | -3.7603058183 | 1.9339281000  |
| 52 | C | -2.7620671731 | -2.5891433198 | 2.5861917748  |
| 53 | H | -0.9911303218 | -4.4789452251 | -0.2838164720 |
| 54 | H | -0.6586010193 | -4.0270166261 | 2.6858967342  |
| 55 | H | 0.2761022077  | -3.3613282664 | 1.3329588114  |
| 56 | H | -3.5248646556 | -4.7227662690 | -0.0110911318 |
| 57 | H | -3.4265579695 | -4.6639632032 | 2.5430040984  |
| 58 | H | -4.5776283068 | -3.5200845859 | 1.8570618771  |
| 59 | H | -2.4570787023 | -2.7977552347 | 3.6119006590  |
| 60 | H | -3.3376246760 | -1.6638640229 | 2.5870780407  |
| 61 | H | -3.8354404652 | -2.1726423675 | -0.1744238661 |
| 62 | H | -2.6251701061 | -2.8220887623 | -1.2706803692 |
| 63 | H | -0.8184739813 | -1.8858961748 | -0.0906032012 |
| 64 | H | -3.1044980946 | -0.2341665254 | 1.0251476388  |
| 65 | H | 1.3750282361  | 1.6627072613  | -1.7617159594 |
| 66 | H | 2.8978439629  | -1.0879628894 | 1.1523701784  |
| 67 | H | 5.6002697830  | 0.9103140705  | -1.5246586275 |
| 68 | H | -0.9350459257 | -1.6557293056 | 2.3131810497  |
| 69 | H | -1.6466078272 | 0.9924825244  | 2.1223661891  |
| 70 | H | 2.0335914715  | 1.7821216153  | 1.7712382379  |

---

**DQ-TU\_cation\_1**

---

E = -2412.02359077219

---

|    |   |                |               |               |
|----|---|----------------|---------------|---------------|
| 1  | C | -10.0660268563 | 2.3277919026  | -2.8198394911 |
| 2  | O | -8.7374990416  | 2.6450675535  | -2.4352816862 |
| 3  | C | -9.0863302458  | 1.4841976620  | -0.3129114006 |
| 4  | C | -7.0031750365  | 2.5751975711  | -0.8947517655 |
| 5  | C | -6.4404188440  | 2.2004461397  | 0.3456692109  |
| 6  | C | -8.5559647131  | 1.1017020506  | 0.8908043895  |
| 7  | C | -7.2316181934  | 1.4400307625  | 1.2561146765  |
| 8  | C | -5.1098832452  | 2.5248200205  | 0.7596560343  |
| 9  | C | -4.6823888423  | 2.0803226825  | 1.9856893132  |
| 10 | C | -5.5492804391  | 1.3258731613  | 2.8050952529  |
| 11 | N | -6.7803278856  | 1.0137174811  | 2.4716905558  |
| 12 | C | -4.1891981278  | 3.3816804086  | -0.0891937811 |
| 13 | C | -4.1311837057  | 4.8334159632  | 0.4526387738  |
| 14 | C | -5.4135228479  | 5.6557603063  | 0.1932078435  |
| 15 | C | -4.9794540885  | 7.0611802146  | -0.2525459966 |
| 16 | C | -3.9654379723  | 7.6152540146  | 0.7858132441  |
| 17 | C | -2.6860570182  | 6.7092537803  | 0.7216127796  |
| 18 | C | -3.6476265016  | 9.0232987411  | 0.5571458391  |
| 19 | C | -3.3670941414  | 10.1758300829 | 0.3432006125  |
| 20 | N | -2.9430657173  | 5.5196793726  | -0.0843771054 |

---

|                       |   |                |               |               |
|-----------------------|---|----------------|---------------|---------------|
| 21                    | N | -2.8008026637  | 2.9200819618  | -0.0621938309 |
| 22                    | C | -2.2921483278  | 1.8213859213  | -0.5672600140 |
| 23                    | N | -0.9692284404  | 1.7015658958  | -0.7154497003 |
| 24                    | C | -0.0630165052  | 2.7719694817  | -0.4448806566 |
| 25                    | C | 0.7671761506   | 2.6979409599  | 0.6651126531  |
| 26                    | C | 1.6427775842   | 3.7499294776  | 0.9255739366  |
| 27                    | C | 1.6706032886   | 4.8659419325  | 0.1012908088  |
| 28                    | C | -0.0389250436  | 3.8790449909  | -1.2917108256 |
| 29                    | C | 0.8252662242   | 4.9253592303  | -1.0043235608 |
| 30                    | C | 2.5135639345   | 3.6888104504  | 2.1531970016  |
| 31                    | C | 0.8530130827   | 6.1584527728  | -1.8675229189 |
| 32                    | F | 3.5351349390   | 4.5589413146  | 2.0869830095  |
| 33                    | F | 3.0334615314   | 2.4619551175  | 2.3224587735  |
| 34                    | F | 1.8116189490   | 3.9763565716  | 3.2619771985  |
| 35                    | F | 0.1834364351   | 5.9883640515  | -3.0164726819 |
| 36                    | F | 2.1131658326   | 6.5107922339  | -2.1772158055 |
| 37                    | F | 0.2985362642   | 7.2109182708  | -1.2349978911 |
| 38                    | S | -3.3841663414  | 0.5198184153  | -1.0357410927 |
| 39                    | H | -10.7999329729 | 2.7686067177  | -2.1360814607 |
| 40                    | H | -10.2192436577 | 1.2447754044  | -2.8844641499 |
| 41                    | H | -10.2002145290 | 2.7631027294  | -3.8101603717 |
| 42                    | C | -8.2975380835  | 2.2317021954  | -1.2231003556 |
| 43                    | H | -10.1044321183 | 1.2069982408  | -0.5584857084 |
| 44                    | H | -9.1400134913  | 0.5252893846  | 1.6003315476  |
| 45                    | H | -6.4448697012  | 3.1418781217  | -1.6296330939 |
| 46                    | H | -5.2054138811  | 0.9742845143  | 3.7751231875  |
| 47                    | H | -3.6802880457  | 2.2999648408  | 2.3422403410  |
| 48                    | H | -3.1262598979  | 11.2011409763 | 0.1658643352  |
| 49                    | C | -4.2910743168  | 6.9483466966  | -1.6183571645 |
| 50                    | C | -3.1479345880  | 5.9091786497  | -1.4886864378 |
| 51                    | H | -4.4187177245  | 7.5317511769  | 1.7813553084  |
| 52                    | H | -1.8509800340  | 7.2496614828  | 0.2707553253  |
| 53                    | H | -2.3825391238  | 6.4040595087  | 1.7264578080  |
| 54                    | H | -5.8451192566  | 7.7253636343  | -0.3102315481 |
| 55                    | H | -3.9026285186  | 7.9252645997  | -1.9232027675 |
| 56                    | H | -5.0177477508  | 6.6404389315  | -2.3763745202 |
| 57                    | H | -2.2037995194  | 6.3104899109  | -1.8645203458 |
| 58                    | H | -3.3637278172  | 5.0082841679  | -2.0711762351 |
| 59                    | H | -6.0301390558  | 5.2087315238  | -0.5936364782 |
| 60                    | H | -6.0335170967  | 5.6961188685  | 1.0931992294  |
| 61                    | H | -3.9606997561  | 4.7517485035  | 1.5322232194  |
| 62                    | H | -4.5207646491  | 3.3831382063  | -1.1307954661 |
| 63                    | H | -2.1664515872  | 3.7091904882  | 0.1379716524  |
| 64                    | H | -0.5667952266  | 0.7837619341  | -0.8961441389 |
| 65                    | H | 0.7274535034   | 1.8320706565  | 1.3181533656  |
| 66                    | H | -0.6885193169  | 3.9154079265  | -2.1592486291 |
| 67                    | H | 2.3497279711   | 5.6835292909  | 0.3121997717  |
| 68                    | H | -2.4829881881  | -0.0811372050 | -1.8320359222 |
| <b>DQ-TU_cation_2</b> |   |                |               |               |
| E = -2412.06416576519 |   |                |               |               |
| 1                     | C | -3.5853053202  | 4.7330903696  | 2.5831371265  |
| 2                     | O | -3.2277932038  | 3.4085896598  | 2.2254829259  |



---

|    |   |               |               |               |
|----|---|---------------|---------------|---------------|
| 3  | C | -3.0416779498 | 4.1033524383  | -0.1088569420 |
| 4  | C | -2.5854981952 | 1.8408892344  | 0.6365586581  |
| 5  | C | -2.2782334691 | 1.4529065510  | -0.6867309285 |
| 6  | C | -2.7507843791 | 3.7423892501  | -1.3978758456 |
| 7  | C | -2.3582868985 | 2.4242379077  | -1.7248306227 |
| 8  | C | -1.8516963921 | 0.1333777977  | -1.0523180440 |
| 9  | C | -1.5222297607 | -0.0889007154 | -2.3644732570 |
| 10 | C | -1.6541871081 | 0.9479114019  | -3.3177485227 |
| 11 | N | -2.0628892572 | 2.1580485399  | -3.0305219418 |
| 12 | C | -1.6757707737 | -0.9303749585 | 0.0258201556  |
| 13 | C | -1.7028452081 | -2.3598206592 | -0.5343192684 |
| 14 | C | -2.9892132427 | -2.7513133910 | -1.2836038147 |
| 15 | C | -3.3084225792 | -4.2248437712 | -0.9887015924 |
| 16 | C | -2.0044251590 | -5.0472246989 | -1.1679834182 |
| 17 | C | -1.0370852041 | -4.6587366146 | -0.0184944388 |
| 18 | C | -2.2446129245 | -6.4890617748 | -1.1761882377 |
| 19 | C | -2.4511665657 | -7.6749165486 | -1.1551325962 |
| 20 | N | -1.5184297114 | -3.3672153942 | 0.5756448409  |
| 21 | N | -0.4082070736 | -0.6751263856 | 0.7055738592  |
| 22 | C | -0.2259791238 | -0.3808255709 | 2.0130978490  |
| 23 | N | 0.9395783296  | 0.2546418266  | 2.3050760415  |
| 24 | C | 1.7802082512  | 0.9321472597  | 1.3892072182  |
| 25 | C | 1.2477817999  | 1.8802147420  | 0.5124192086  |
| 26 | C | 2.0878640647  | 2.5344524024  | -0.3784079204 |
| 27 | C | 3.4563378639  | 2.2817137053  | -0.3861779187 |
| 28 | C | 3.1463525083  | 0.6668390331  | 1.3869285597  |
| 29 | C | 3.9771710270  | 1.3544645324  | 0.5066437059  |
| 30 | C | 1.4922960899  | 3.5003815824  | -1.3682751416 |
| 31 | C | 5.4575351148  | 1.0873410241  | 0.5556280626  |
| 32 | F | 2.3999245320  | 4.3981723106  | -1.7971123460 |
| 33 | F | 0.4679209594  | 4.1835272412  | -0.8347519453 |
| 34 | F | 1.0244290545  | 2.8624937256  | -2.4520255480 |
| 35 | F | 6.0124278377  | 1.6245340422  | 1.6583103286  |
| 36 | F | 6.1003408467  | 1.6005763971  | -0.5066528316 |
| 37 | F | 5.7184548881  | -0.2292609465 | 0.5897525598  |
| 38 | S | -1.3173560977 | -0.7815879046 | 3.2484563626  |
| 39 | H | -2.7849690459 | 5.4446460307  | 2.3504024142  |
| 40 | H | -3.7408338960 | 4.7175507359  | 3.6620279828  |
| 41 | H | -4.5154322055 | 5.0466260479  | 2.0959595464  |
| 42 | C | -2.9568461889 | 3.1390132498  | 0.9257261421  |
| 43 | H | -3.3317286594 | 5.1245441186  | 0.1069394234  |
| 44 | H | -2.8034825038 | 4.4646080988  | -2.2054935016 |
| 45 | H | -2.5350955111 | 1.1447350262  | 1.4673096175  |
| 46 | H | -1.4085518229 | 0.7526134809  | -4.3592582829 |
| 47 | H | -1.1593573761 | -1.0474155384 | -2.7176304187 |
| 48 | H | -2.6314935869 | -8.7276666569 | -1.1502814625 |
| 49 | C | -3.7764791794 | -4.3525916249 | 0.4643838694  |
| 50 | C | -2.7772834204 | -3.6069987713 | 1.3620159966  |
| 51 | H | -1.5531161267 | -4.7771492890 | -2.1290840049 |
| 52 | H | -1.0346807372 | -5.3988576089 | 0.7816984859  |
| 53 | H | -0.0159398350 | -4.5093116959 | -0.3695595317 |
| 54 | H | -4.0721862345 | -4.5932638685 | -1.6748904773 |

---

|    |   |               |               |               |
|----|---|---------------|---------------|---------------|
| 55 | H | -3.8468776355 | -5.4069196983 | 0.7456002021  |
| 56 | H | -4.7706040454 | -3.9164731484 | 0.5847302697  |
| 57 | H | -2.4889620302 | -4.1721948863 | 2.2482212450  |
| 58 | H | -3.1400421796 | -2.6364289614 | 1.6957025717  |
| 59 | H | -3.8256611520 | -2.1193409478 | -0.9668032564 |
| 60 | H | -2.8553569544 | -2.5879472153 | -2.3540516776 |
| 61 | H | -0.8247353106 | -2.5006229443 | -1.1703617422 |
| 62 | H | -2.4696091129 | -0.8258638031 | 0.7680749552  |
| 63 | H | 0.3665452010  | -0.4892653095 | 0.0730228020  |
| 64 | H | 1.1940696584  | 0.2852468387  | 3.2846418724  |
| 65 | H | 0.1862949966  | 2.1075898051  | 0.5357193141  |
| 66 | H | 3.5533704268  | -0.0760149426 | 2.0652944154  |
| 67 | H | 4.1066895502  | 2.8043280820  | -1.0759743897 |
| 68 | H | -0.7916182949 | -3.0208480426 | 1.2134011999  |

### DQ-TU cation\_3

E = -2412.03717845262

|    |   |               |               |               |
|----|---|---------------|---------------|---------------|
| 1  | C | -5.8911799066 | 4.9746635406  | 0.9406327243  |
| 2  | O | -5.1102450297 | 3.7966515352  | 1.0644876579  |
| 3  | C | -4.5755078081 | 3.9105313865  | -1.3174912053 |
| 4  | C | -3.7499987889 | 2.1604098300  | 0.1383930179  |
| 5  | C | -3.0620394313 | 1.5596320680  | -0.9382307815 |
| 6  | C | -3.9168001858 | 3.3425832039  | -2.3760739510 |
| 7  | C | -3.1473051029 | 2.1659937987  | -2.2233585102 |
| 8  | C | -2.2696173652 | 0.3704202938  | -0.8214772731 |
| 9  | C | -1.6454225447 | -0.0942427306 | -1.9497439730 |
| 10 | C | -1.8023986097 | 0.5840004605  | -3.1798843274 |
| 11 | N | -2.5186022326 | 1.6720106794  | -3.3312746374 |
| 12 | C | -2.1121447660 | -0.2914262941 | 0.5413844740  |
| 13 | C | -1.7383153702 | -1.7782926686 | 0.4546440184  |
| 14 | C | -2.8192000938 | -2.6668716879 | -0.1848480765 |
| 15 | C | -2.9005142561 | -3.9876058324 | 0.5942007780  |
| 16 | C | -1.4595966342 | -4.5412720926 | 0.7585673079  |
| 17 | C | -0.6856377218 | -3.5918908343 | 1.7126561638  |
| 18 | C | -1.4399704317 | -5.9129975521 | 1.2628959043  |
| 19 | C | -1.4371988694 | -7.0323116503 | 1.7065494176  |
| 20 | N | -1.4653752233 | -2.3210086445 | 1.8326956639  |
| 21 | N | -1.1971849315 | 0.4590725544  | 1.4080787131  |
| 22 | C | 0.0938296089  | 0.7378203316  | 1.0772788621  |
| 23 | N | 0.7111816923  | 0.0232266899  | 0.2161636713  |
| 24 | C | 1.9998052865  | 0.2972818252  | -0.2279010110 |
| 25 | C | 2.2139964327  | 1.1793697213  | -1.2924818079 |
| 26 | C | 3.5022399785  | 1.4067826502  | -1.7578382216 |
| 27 | C | 4.5971891625  | 0.7682053378  | -1.1824551430 |
| 28 | C | 3.0942662695  | -0.3528792744 | 0.3453221365  |
| 29 | C | 4.3795083417  | -0.1117747495 | -0.1312878826 |
| 30 | C | 3.7101166910  | 2.4103756284  | -2.8596469705 |
| 31 | C | 5.5295090311  | -0.8125661102 | 0.5397678913  |
| 32 | F | 4.8751365528  | 2.2191080510  | -3.5024888277 |
| 33 | F | 3.7248229820  | 3.6674656467  | -2.3791978461 |
| 34 | F | 2.7293099608  | 2.3532759523  | -3.7752855962 |
| 35 | F | 5.6762795136  | -0.3979324671 | 1.8112375655  |
| 36 | F | 6.6970899867  | -0.5958439256 | -0.0894373896 |

|    |   |               |               |               |
|----|---|---------------|---------------|---------------|
| 37 | F | 5.3363551313  | -2.1410007436 | 0.5854479827  |
| 38 | S | 0.7559832250  | 2.1626670988  | 1.9649523427  |
| 39 | H | -5.2826874158 | 5.8305120473  | 0.6278211656  |
| 40 | H | -6.2922031929 | 5.1708645934  | 1.9349908781  |
| 41 | H | -6.7243477129 | 4.8341521480  | 0.2431787068  |
| 42 | C | -4.4921504081 | 3.3094811226  | -0.0371423092 |
| 43 | H | -5.1542894172 | 4.8131649617  | -1.4719421309 |
| 44 | H | -3.9666248996 | 3.7831651269  | -3.3661300380 |
| 45 | H | -3.7286095220 | 1.7458277094  | 1.1388484180  |
| 46 | H | -1.3042540983 | 0.2044720509  | -4.0693562607 |
| 47 | H | -1.0091441689 | -0.9704462407 | -1.9339149130 |
| 48 | H | -1.4288524974 | -8.0313438679 | 2.0844993867  |
| 49 | C | -3.4954384393 | -3.7156280083 | 1.9804375511  |
| 50 | C | -2.7182319210 | -2.5583385963 | 2.6298306634  |
| 51 | H | -0.9746754920 | -4.5357277491 | -0.2238090889 |
| 52 | H | -0.5892888742 | -4.0098698691 | 2.7149656382  |
| 53 | H | 0.3040778131  | -3.3396401027 | 1.3320510645  |
| 54 | H | -3.5093321623 | -4.7122457069 | 0.0515825237  |
| 55 | H | -3.4383997973 | -4.6171298528 | 2.5961640097  |
| 56 | H | -4.5507645506 | -3.4491320982 | 1.8906232040  |
| 57 | H | -2.4040367516 | -2.7776645343 | 3.6503904855  |
| 58 | H | -3.2804617083 | -1.6251419114 | 2.6431875301  |
| 59 | H | -3.7941334003 | -2.1683405630 | -0.1644520361 |
| 60 | H | -2.5734709870 | -2.8403818751 | -1.2344385817 |
| 61 | H | -0.7828870698 | -1.8718038152 | -0.0609322939 |
| 62 | H | -3.0823122636 | -0.2298797565 | 1.0406331490  |
| 63 | H | 1.3664895720  | 1.6759554667  | -1.7525645030 |
| 64 | H | 2.9331640459  | -1.0495023549 | 1.1619563122  |
| 65 | H | 5.5978416031  | 0.9471851024  | -1.5537099573 |
| 66 | H | -0.8915464530 | -1.6311728780 | 2.3368371338  |
| 67 | H | -1.6336133830 | 1.0169118733  | 2.1316196540  |
| 68 | H | 2.0396890091  | 1.8376765504  | 1.7602217765  |

**Table S8b** Total energies in Hartree and optimized coordinates calculated in THF solvent using the SM8 method on wB97X-D/6-31G\* level for neutral and protonated monomer and dimer THF molecules.

| monomer THF           |   |               |               |               |
|-----------------------|---|---------------|---------------|---------------|
| E = -232.385827420250 |   |               |               |               |
| 1                     | C | -5.8519654355 | -0.5715759916 | 0.0787267442  |
| 2                     | C | -4.4011318608 | -0.4005708892 | -0.3766738800 |
| 3                     | C | -6.3633622476 | 0.8654207007  | 0.0035061775  |
| 4                     | C | -4.0450796191 | 0.9419451081  | 0.2569948024  |
| 5                     | O | -5.2468308664 | 1.7103680674  | 0.2794550746  |
| 6                     | H | -6.7522801481 | 1.0951751762  | -0.9991615289 |
| 7                     | H | -7.1556682393 | 1.0798113300  | 0.7285315186  |
| 8                     | H | -6.4300480649 | -1.2561580626 | -0.5463524794 |
| 9                     | H | -5.8865599620 | -0.9368496681 | 1.1109433708  |
| 10                    | H | -3.7416331639 | -1.2081216809 | -0.0503588383 |
| 11                    | H | -4.3488360148 | -0.3338162231 | -1.4689460202 |
| 12                    | H | -3.2841626878 | 1.4966001635  | -0.3018882646 |
| 13                    | H | -3.6777076899 | 0.8081869696  | 1.2852243233  |

monomer THF-H

| E = -232.796755215918                     |   |               |               |               |
|-------------------------------------------|---|---------------|---------------|---------------|
| 1                                         | C | -5.9019052449 | -0.5520742848 | -0.1113871577 |
| 2                                         | C | -4.3518483898 | -0.4656339304 | -0.1492025676 |
| 3                                         | C | -6.4028555886 | 0.8536707602  | 0.1654851979  |
| 4                                         | C | -3.9974691733 | 0.9862437278  | 0.1144461871  |
| 5                                         | O | -5.2525183563 | 1.6886466955  | -0.3113482747 |
| 6                                         | H | -6.5368801026 | 1.0749060713  | 1.2253365066  |
| 7                                         | H | -7.2607922463 | 1.1755886779  | -0.4200336483 |
| 8                                         | H | -6.2538703604 | -1.2261924089 | 0.6699425481  |
| 9                                         | H | -6.2855059268 | -0.9133389578 | -1.0656784011 |
| 10                                        | H | -3.9776129659 | -0.7798738931 | -1.1235420374 |
| 11                                        | H | -3.8904000970 | -1.0982681351 | 0.6094226913  |
| 12                                        | H | -3.8467314795 | 1.2202382936  | 1.1692824476  |
| 13                                        | H | -3.2057337937 | 1.4023249481  | -0.5037667612 |
| 14                                        | H | -5.2965352750 | 2.6065834356  | 0.0186012694  |
| dimer THF                                 |   |               |               |               |
| E = -464.775875891339                     |   |               |               |               |
| 1                                         | C | -5.7524165887 | -0.7454928609 | -0.1258011307 |
| 2                                         | C | -4.2479945255 | -0.4322954949 | 0.0282533512  |
| 3                                         | C | -6.4215172643 | 0.6361717910  | 0.0112055463  |
| 4                                         | C | -4.2448006094 | 1.0485922547  | 0.4200934519  |
| 5                                         | O | -5.3995249429 | 1.5982931269  | -0.1952756824 |
| 6                                         | H | -7.2073080322 | 0.8207904732  | -0.7261912386 |
| 7                                         | H | -6.8535059196 | 0.7574326176  | 1.0161754177  |
| 8                                         | H | -5.9651486847 | -1.1965626994 | -1.0985037129 |
| 9                                         | H | -6.1103630693 | -1.4319328901 | 0.6456306079  |
| 10                                        | H | -3.7598557204 | -1.0543729605 | 0.7821961527  |
| 11                                        | H | -3.7235205036 | -0.5761008825 | -0.9209415869 |
| 12                                        | H | -3.3754692393 | 1.6044065010  | 0.0590011282  |
| 13                                        | H | -4.3092179697 | 1.1544220782  | 1.5128734364  |
| 14                                        | C | -6.8330153952 | -0.7444559169 | 3.5194434679  |
| 15                                        | C | -6.8501404522 | -1.6556719061 | 4.7537395604  |
| 16                                        | C | -5.5278618675 | -2.4471699653 | 4.6234126815  |
| 17                                        | C | -4.8515396191 | -1.8114101204 | 3.3940747121  |
| 18                                        | O | -5.4621000217 | -0.5427092783 | 3.2212992873  |
| 19                                        | H | -7.2913674574 | 0.2341566923  | 3.6799561833  |
| 20                                        | H | -7.3411086112 | -1.2301363415 | 2.6697178324  |
| 21                                        | H | -6.8547797601 | -1.0563609589 | 5.6681152671  |
| 22                                        | H | -7.7321697181 | -2.3003067440 | 4.7723073578  |
| 23                                        | H | -5.6940624574 | -3.5170819545 | 4.4759288751  |
| 24                                        | H | -4.9106762076 | -2.3288756969 | 5.5173053765  |
| 25                                        | H | -5.0137370719 | -2.4324303736 | 2.4985190701  |
| 26                                        | H | -3.7770342908 | -1.6526194902 | 3.5112395876  |
| dimer THF-H (protonated on the first THF) |   |               |               |               |
| E = -465.218345090135                     |   |               |               |               |
| 1                                         | C | -6.2525138969 | -0.1619841803 | -0.8081284881 |
| 2                                         | C | -4.8581947422 | -0.7909017082 | -0.8931601768 |
| 3                                         | C | -6.0443042343 | 0.9843785232  | 0.1628152204  |
| 4                                         | C | -4.3731836390 | -0.7347017637 | 0.5433187929  |
| 5                                         | O | -4.9912915185 | 0.4964505684  | 1.0819417723  |
| 6                                         | H | -6.9073560139 | 1.2470614125  | 0.7747875441  |
| 7                                         | H | -5.6377025761 | 1.8797714953  | -0.3064038892 |

|    |   |               |               |               |
|----|---|---------------|---------------|---------------|
| 8  | H | -6.9784117717 | -0.8792040876 | -0.4128322584 |
| 9  | H | -6.6174966015 | 0.1945642429  | -1.7725170042 |
| 10 | H | -4.8770353248 | -1.8165330906 | -1.2647505402 |
| 11 | H | -4.2042320605 | -0.2021317593 | -1.5422120292 |
| 12 | H | -4.7389002388 | -1.5716251250 | 1.1433583287  |
| 13 | H | -3.2975347250 | -0.6225072417 | 0.6667182088  |
| 14 | C | -6.8678025505 | -0.9895900442 | 3.2951265402  |
| 15 | C | -6.2395342123 | -2.1595118144 | 4.0338116749  |
| 16 | C | -5.3446693253 | -1.4516884702 | 5.0547448424  |
| 17 | C | -4.7944527989 | -0.2810396156 | 4.2551705308  |
| 18 | O | -5.8472700985 | 0.0514745040  | 3.3006951570  |
| 19 | H | -7.7450236004 | -0.5897960314 | 3.8089706050  |
| 20 | H | -7.1306659724 | -1.2003658407 | 2.2557050451  |
| 21 | H | -6.9912720852 | -2.8033409214 | 4.4933900313  |
| 22 | H | -5.6375657890 | -2.7715980486 | 3.3542386509  |
| 23 | H | -4.5467183398 | -2.0887325758 | 5.4399156728  |
| 24 | H | -5.9353243327 | -1.0932914626 | 5.9030092381  |
| 25 | H | -3.8966716969 | -0.5541864379 | 3.6912490705  |
| 26 | H | -4.5913331664 | 0.6141605125  | 4.8428260907  |
| 27 | H | -5.3752616883 | 0.3269769603  | 2.0959523691  |

**dimer THF-H (protonated on the second THF)**

E = -465.218286448533

|    |   |               |               |               |
|----|---|---------------|---------------|---------------|
| 1  | C | -4.9117432203 | -1.2619237436 | -0.5311487101 |
| 2  | C | -4.0898612987 | 0.0118852042  | -0.7477611792 |
| 3  | C | -6.0769087783 | -0.7531690420 | 0.3018316005  |
| 4  | C | -4.2096804511 | 0.7132545699  | 0.5962417429  |
| 5  | O | -5.5235406924 | 0.3327464473  | 1.1013199814  |
| 6  | H | -6.8783888096 | -0.3324375074 | -0.3098791513 |
| 7  | H | -6.5012075995 | -1.4940230913 | 0.9834858182  |
| 8  | H | -4.3299727608 | -2.0048742359 | 0.0239738835  |
| 9  | H | -5.2461409557 | -1.7211887627 | -1.4628839077 |
| 10 | H | -4.5291453025 | 0.6245402966  | -1.5406185275 |
| 11 | H | -3.0492495904 | -0.1889039047 | -1.0083933173 |
| 12 | H | -3.4551953931 | 0.3674147608  | 1.3098076763  |
| 13 | H | -4.1829127439 | 1.8016454250  | 0.5426752994  |
| 14 | C | -6.9402970350 | -0.0216589502 | 4.0182327656  |
| 15 | C | -7.1277366483 | -1.2734799700 | 4.8557353310  |
| 16 | C | -6.2795319359 | -2.3161990124 | 4.1207352462  |
| 17 | C | -5.0535619583 | -1.5199539090 | 3.7189028725  |
| 18 | O | -5.5686666960 | -0.1550652003 | 3.4739302606  |
| 19 | H | -7.6202492512 | 0.0275279384  | 3.1650702158  |
| 20 | H | -6.9638574426 | 0.9150014565  | 4.5712445492  |
| 21 | H | -8.1809711543 | -1.5512263423 | 4.9177524559  |
| 22 | H | -6.7545361185 | -1.1155105495 | 5.8712685747  |
| 23 | H | -6.0143345510 | -3.1676088177 | 4.7492350957  |
| 24 | H | -6.8065288775 | -2.6932861789 | 3.2390184290  |
| 25 | H | -4.5619302404 | -1.8465908996 | 2.8019200646  |
| 26 | H | -4.3192415723 | -1.4248796666 | 4.5184369116  |
| 27 | H | -5.5396749225 | 0.0928586853  | 2.4083380183  |

**dimer THF-2H (protonated on both THF)**

E = -465.590126426655

|   |   |               |               |               |
|---|---|---------------|---------------|---------------|
| 1 | C | -5.9419823692 | -0.0886651371 | -0.9829816517 |
|---|---|---------------|---------------|---------------|

---

|    |   |               |               |               |
|----|---|---------------|---------------|---------------|
| 2  | C | -4.4447624615 | 0.2366617417  | -1.0474933711 |
| 3  | C | -6.5537961715 | 1.1701380592  | -0.4152422799 |
| 4  | C | -4.1711644646 | 0.9528612645  | 0.2579389896  |
| 5  | O | -5.5099871960 | 1.5842245415  | 0.5931719288  |
| 6  | H | -6.6371550459 | 1.9812264361  | -1.1383098071 |
| 7  | H | -7.4725143100 | 1.0505648657  | 0.1537104738  |
| 8  | H | -6.1331419722 | -0.9399710931 | -0.3246061133 |
| 9  | H | -6.3636296998 | -0.3136108172 | -1.9634174270 |
| 10 | H | -4.2248154020 | 0.8859093613  | -1.8985567723 |
| 11 | H | -3.8263771273 | -0.6581575996 | -1.1331344168 |
| 12 | H | -3.9749374752 | 0.2953455127  | 1.1017568525  |
| 13 | H | -3.4436099105 | 1.7607665806  | 0.2154792820  |
| 14 | C | -6.5263898065 | -1.9115233354 | 3.2575386538  |
| 15 | C | -6.9753772910 | -1.9989179721 | 4.6980573735  |
| 16 | C | -5.7472188577 | -1.5232171692 | 5.4823803325  |
| 17 | C | -4.5907580302 | -2.2044570331 | 4.7873282461  |
| 18 | O | -5.0392380270 | -2.2013347050 | 3.3401411265  |
| 19 | H | -6.9499822517 | -2.6454991384 | 2.5736672385  |
| 20 | H | -6.5727256065 | -0.9063949261 | 2.8444331830  |
| 21 | H | -7.2352856404 | -3.0274073925 | 4.9621394286  |
| 22 | H | -7.8486433779 | -1.3690546105 | 4.8718715254  |
| 23 | H | -5.6431890513 | -0.4362248741 | 5.4312467347  |
| 24 | H | -5.7855709795 | -1.8129074674 | 6.5332740106  |
| 25 | H | -3.6429271190 | -1.6721448141 | 4.7922123947  |
| 26 | H | -4.4651935695 | -3.2493324457 | 5.0699678386  |
| 27 | H | -5.4562521275 | 2.5512940063  | 0.7016341398  |
| 28 | H | -4.8045096585 | -3.0349148388 | 2.8921310862  |

---
